# Supplementary material
Source: PubMed Central journal article supplement (PMC8166093)
Supplement: pnas.2021683118.sapp.pdf [file pnas.2021683118.sapp.pdf]

## **Supplementary Information for**

### **Microevolution in the pan-secondary metabolome of *Aspergillus flavus* and its potential macroevolutionary implications for filamentous fungi**

Milton T. Drott<sup>1\*</sup>, Tomás A. Rush<sup>2</sup>, Tatum R. Satterlee<sup>3</sup>, Richard J. Giannone<sup>2</sup>, Paul E. Abraham<sup>2</sup>, Claudio Greco<sup>4</sup>, Nandhitha Venkatesh<sup>5,6</sup>, Jeffrey M. Skerker<sup>7</sup>, N. Louise Glass<sup>7,8,9</sup>, Jesse L. Labbé<sup>2</sup>, Michael G. Milgroom<sup>10</sup>, Nancy P. Keller<sup>1,5\*</sup>

#### **Corresponding Authors:**

\*Milton T. Drott ([mdrott@wisc.edu](mailto:mdrott@wisc.edu)) and Nancy P. Keller ([npkeller@wisc.edu](mailto:npkeller@wisc.edu))

#### **This PDF file includes:**

Supplementary text  
Figures S1 to S29  
Tables S1 to S4  
SI References

## Supplementary Information Text

### Supplemental methods

#### Validation of biosynthetic gene clusters:

To minimize the impact of genome fragmentation, cutoff values for network construction were optimized by generating sets of biosynthetic gene cluster (BGC) networks between 0.3 (default cutoff) and 0.6 at intervals of 0.05. The set of networks that contained the highest number of BGCs but did not result in associations between networks that were distinct at the 0.3 cutoff was selected (optimized cutoff was 0.5). For each network we compared the number of backbone genes identified by antiSMASH. Backbone genes that were not incorporated into BGCs because of assembly fragmentation were identified using reciprocal best-hit BLAST. In a single instance when the absence of such genes from antiSMASH-identified clusters could not be explained by genome fragmentation, we assumed that differences in protein domains were meaningful and did interpret the BGC as present (see BGC 8 in results, Fig. 1 and Fig. S2). We determined the percent identity of backbone genes relative to the NRRL3357 reference genome using a global alignment implemented in EMBOSS (1).

To identify BGCs that differed between populations in presence/absence or in the protein sequence identity of backbone genes, we visually identified patterns from a series of heatmaps in R using 'ggplot2' (2) (Fig. S2). To confirm patterns observed in heatmaps, we obtained BGC-representative sequence data from the reference genome when present or, if not, from an isolate with a high-quality assembly (as determined by overall genome-quality metrics and corresponding contig-size). Using representative sequences, we perform BLASTN and BLASTP of backbone-gene sequences against all other isolates using the BLAST+ suite v2.8.1 (3). When BLAST analyses returned high-quality nucleotide hits but only low-identity or no protein hits, we confirmed that this result reflected pseudogenization of genes by checking the protein domains present in neighboring genes (as can occur by annotation error) in three isolates from each affected population using the NCBI Conserved Domains tool (4). We only interpreted population-specific differences in proteins when impacted domains could not be found in neighboring genes, assuming that our validation indicates that such differences are not caused by annotation error. For BGCs present in the reference genome, we confirmed all apparent deletions in other isolates by aligning raw-reads to the reference assembly using BWA MEM (5). However, it was computationally prohibitive to align all raw reads to all isolates. Thus, in cases where a BGC was novel relative to the reference genome, we relied on BLASTN to indicate deletions, and only aligned raw reads to a representative isolate's genome (as mentioned above) in rare cases where BLASTN results returned any hit  $\geq 20\%$  the length of the query.

#### Site-frequency estimates of dN/dS ratios in backbone genes:

We suggest that our assessments of protein-domain and chemical differentiation associated with population-specific differences in BGCs give important ecological and evolutionary context, as selection acts upon phenotypes. While such inferences can be bolstered by site-frequency estimates of the ratio of non-synonymous (dN) and synonymous (dS) mutations found in a gene in some circumstances, we emphasize that this method is not easily applied to our data set as this analysis was originally developed to compare deeply divergent species. Within species, dN/dS estimates are relatively insensitive to selection, and may not conform to classic interpretations of these estimates (reviewed by (6)). Despite this, we provide these estimates to further support our suggestion of the ecological and evolutionary importance of the population-specific patterns we identify. Given problems associated with these estimates, we urge caution when interpreting these results.

To determine dN/dS ratios, we aligned nucleotide sequences of backbone-gene coding regions using MAFFT (7) with the setting “—auto”. Resulting alignments were used to construct maximum likelihood trees with IQ-TREE (8) after testing for the best-fitting model using the “-mset” parameter, constrained within RAXML-compatible models for computational reasons. Sequence alignments were reformatted using Pal2Nal (9). We then estimated a single dN/dS ratio across entire phylogenies using PAML (10). We did not perform these analyses on BGCs 1 or 3 because so few isolates were found to have these clusters. Similarly, for the idiomorphic BGC (BGC 14), we only performed analyses on the two most common backbone genes.

#### Metabolite identification and chemical analyses:

Acquisition and processing of UHPLC-MS data was done using the open-source software program, Maven version 2011.6.17 and the Thermo Scientific Xcalibur software version 4.3. Files were later converted to .mzXML using MassMatrix MS Data File Conversion grouped by condition, and run in the XCMS open-source package (<https://xcmsonline.scripps.edu/>) (11, 12). The latter allows a pairwise comparison of two populations using parameter ID 3110 (UPLC/Q-Exactive). Differential masses found via XCMS were filtered by having a maximum intensity greater than  $5 \times 10^4$  as done in Pfannenstiel et al., (13) and Tannous et al. (14). PubChem (<https://pubchem.ncbi.nlm.nih.gov/>) was used to get an exact mass spectrometry profile from computed analysis, and Maven (15) was used to obtaining high-resolution full-scan mass spectrometry data. Differences of  $m/z$  values between PubChem and Maven were below 1 ppm. While an accuracy of  $<1$  ppm to the unfragmented parent ion and its molecular formula is sufficient for a putative match (16), a standard is necessary to exclude candidates with complex element compositions (17) (see next paragraph). Identified masses that had a maximum intensity lower than  $5 \times 10^4$  were considered background. Volcano plots showing the  $-\log_{10}$  ( $P$ -values) versus the  $\log_2$  (fold change) were then constructed on GraphPad Prism version 8.3.0 to display

metabolites with statistically significant mean differences in abundance among populations in positive ionization mode. Consistent with previous work (13), we have assumed that ions that show significant differences between groups are metabolites. Metabolites were filtered based on a *P*-value lower than 0.05 and a fold change higher than 1.0. We only interpret positive ionization samples because an initial screening of a subsample of extracts in negative ionization mode did not prove more sensitive for target SMs. Additionally, because of small sample size for S-type isolates (*N*=2), we do not draw comparisons between these isolates and L-type *A. flavus* populations that are the focus of this article.

The identification of putative SMs was further confirmed using the fragmentation patterns produced in tandem mass spectra (MS/MS) to annotate major identifiable peaks (Table S3, Figs. S5-S29). A Q Exactive Plus mass spectrometer operating in ES<sup>+</sup> mode with a normalized HCD collision energy of 30% was utilized for this task. Both Aflatoxin B1 (AC000018; <https://mona.fiehnlab.ucdavis.edu/spectra/display/AC000018>) and cyclopiazonic acid (AC000052; <https://mona.fiehnlab.ucdavis.edu/spectra/display/AC000052>) were confirmed by comparison to molecular standards qualified in the MassBank of North America Database (MoNA). Aflatrem and ditryptophenaline fragmentation patterns matched to spectra available on the Mass Spectrometry Search Tool (MASST) database (community match to soils and fungal SM collection; MS000084355 [aflatrem] and MSV000079098 [aflatrem and ditryptophenaline]). The metabolites, 14-deacetyl astellolide A, 14-deacetyl astellolide B, astellolide A, astellolide B, aflavarin, asparasone A, leporin B, and ustiloxin B had measured monoisotopic masses/chemical formulas that matched available PubChem data, but could not be confirmed via fragmentation pattern analysis as chemical standards were not available at this time; therefore these are considered putative identifications (Table S3). The fragmentation spectra for confirmed and putative SMs are provided in Figs. S5-S29.

In order to determine if populations were differentiated based on their metabolomes, we performed principle component analysis (PCA) on data that was generated by XCMS multigroup analysis (11, 18). The abundances of all ions for each medium was analyzed separately using 'FactoMineR' (19). Confidence intervals were drawn at the 0.95 confidence level using 'Tidyverse' (20) based on population structure identified here, and on the aflatoxin producing ability of isolates which was determined previously. Aflatoxin production was identified on several different media types, including PDA (21, 22) but not GMM as aflatoxin production on the latter is typically low or absent.

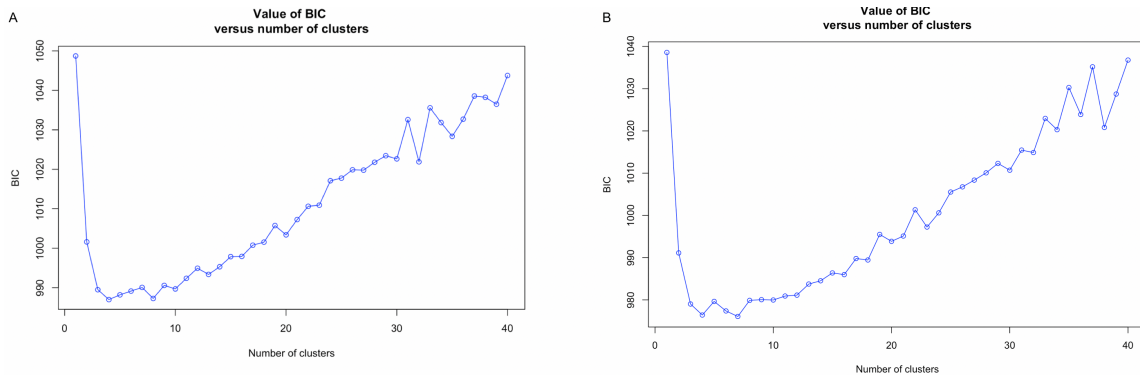

**Fig. S1.** Plot of Bayesian information criterion (BIC) versus the number of possible clusters representing SNP data from 94 isolates of *Aspergillus flavus* from the United States using all data (A) and data with biosynthetic gene clusters (BGCs) removed (B). BIC is a goodness-of-fit measure, whereas clusters represent potential populations. The lowest point indicates the optimal number of populations. We inferred three populations of L-type *A. flavus*, with a fourth population comprising two S-type isolates, which was not well supported. S-type isolates were not included in subsequent population-level analyses.

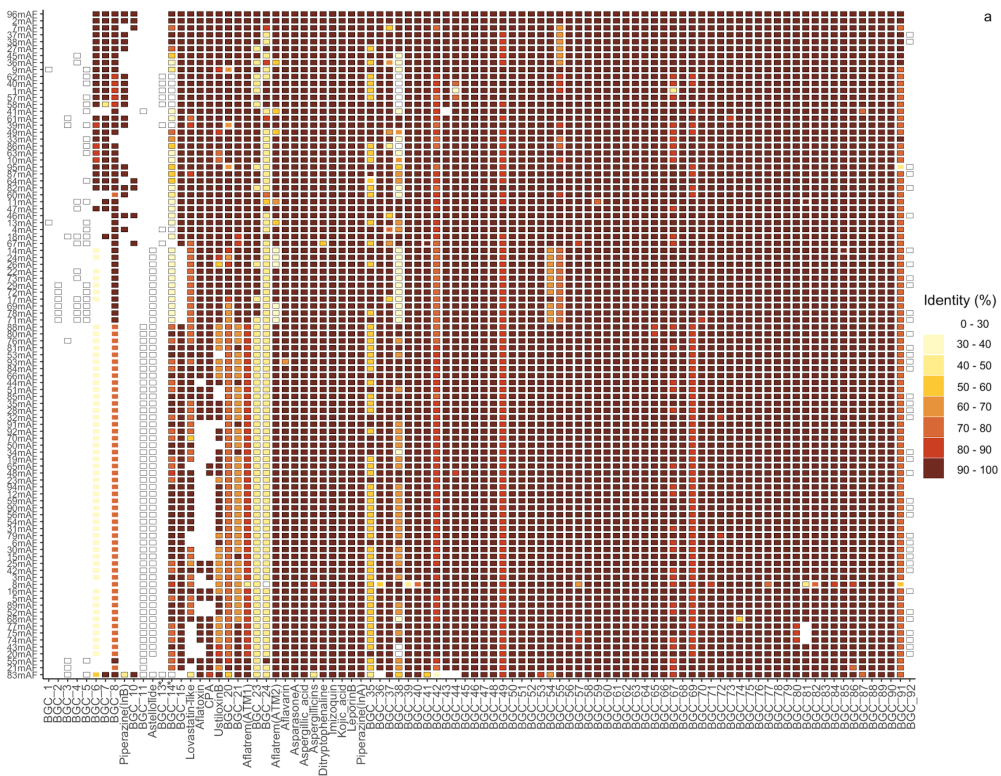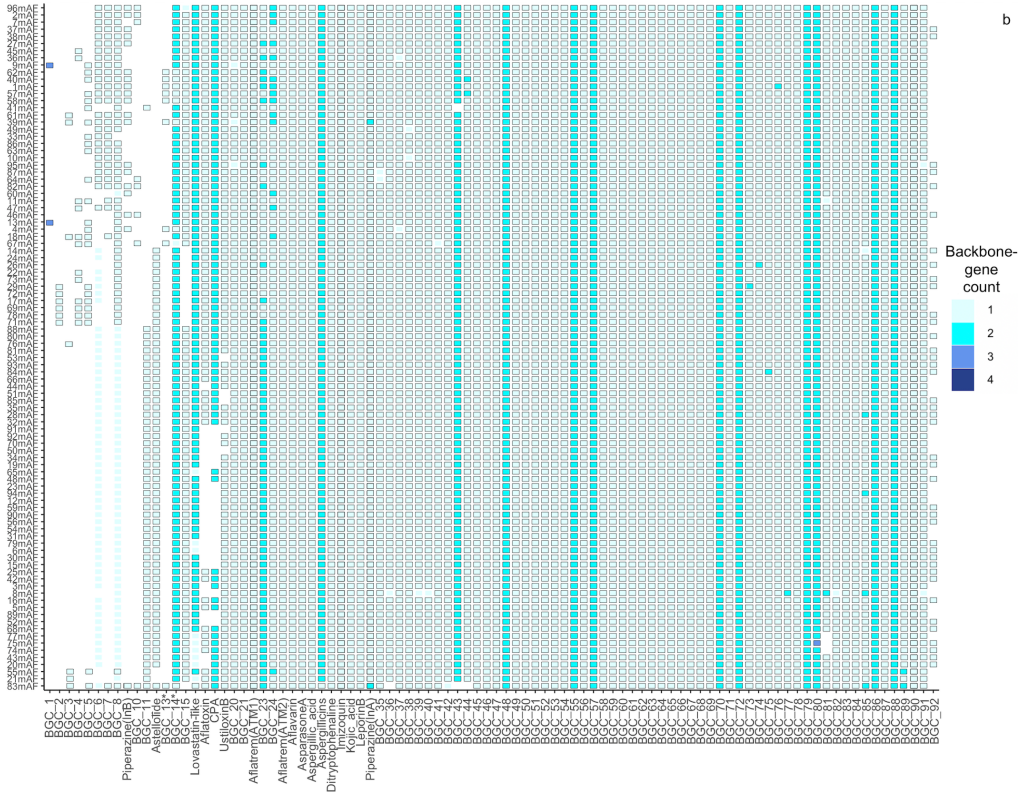

**Fig. S2.** Distribution of 92 biosynthetic gene clusters (BGCs) analyzed in this study from 92 L-type *Aspergillus flavus* strains, two S-strain (55mAF and 21mAF, third and second from bottom)

and one *Aspergillus minisclerotigenes* isolate (83mAF, bottom -- – formerly identified as *Aspergillus texensis* (see methods)). Coloration indicates the protein sequence identity (a) and total count (b) of backbone genes (core biosynthetic genes (e.g., polyketide synthases and nonribosomal peptide synthetases) found in BGCs. We confirmed population-specific patterns of variation evident in the first 24 BGCs (as shown in Fig. 1), but did not identify, or were unable to validate, differences in the remaining 68 BGCs. The presence of a BGC, as indicated with a black-bordered box, was determined through network analysis of antiSMASH results that uses total gene content of BGCs, or by previous studies (see methods). The protein sequence identity of backbone genes was determined relative to the NRRL3357 reference genome (assemblies of this genome are represented by the first two isolates listed: 2mAF and 96mAF); when a BGC is not present in the reference genome, all boxes corresponding to protein sequence identity are left white (BGCs 1-5 and 11-13). A colored box without a black border indicates that reciprocal best-hit BLAST determined that a homologous backbone gene was present in an isolate, but the BGC was not found by antiSMASH (see methods for interpretation).

\*These BGCs are physically overlapping but were distinguished by antiSMASH based on differences in gene content (see main text).

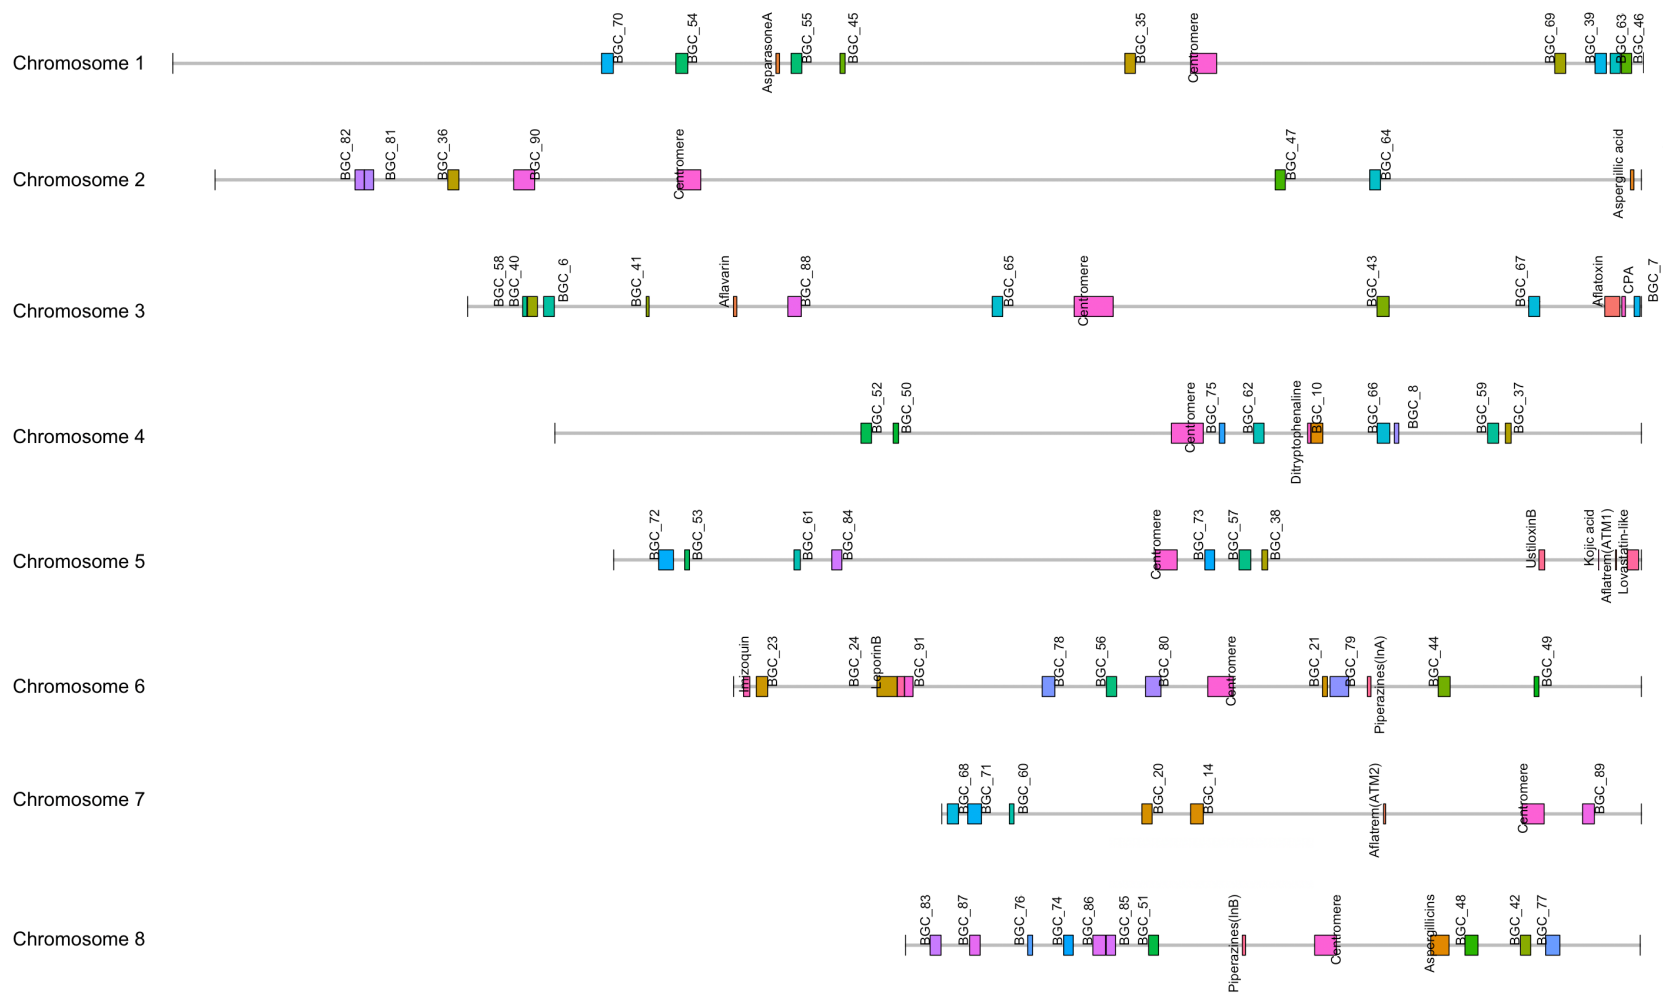

**Fig S3.** Chromosome map indicating the physical location of biosynthetic gene clusters (BGCs) in the NRRL3357 reference genome of *Aspergillus flavus*. BGCs were identified in this study by antiSMASH or by previous studies (see methods). Chromosome numbers correspond to contig names used in annotation files (see Drott et al. (21)) and Table S2 from one through eight: tig00000001\_arrow\_pilon, tig00101497\_arrow\_pilon, tig00000023\_arrow\_pilon, tig00000029\_arrow\_pilon, tig00000037\_arrow\_pilon, tig00000050\_arrow\_pilon, tig00101499\_arrow\_pilon, and tig00000095\_arrow\_pilon.



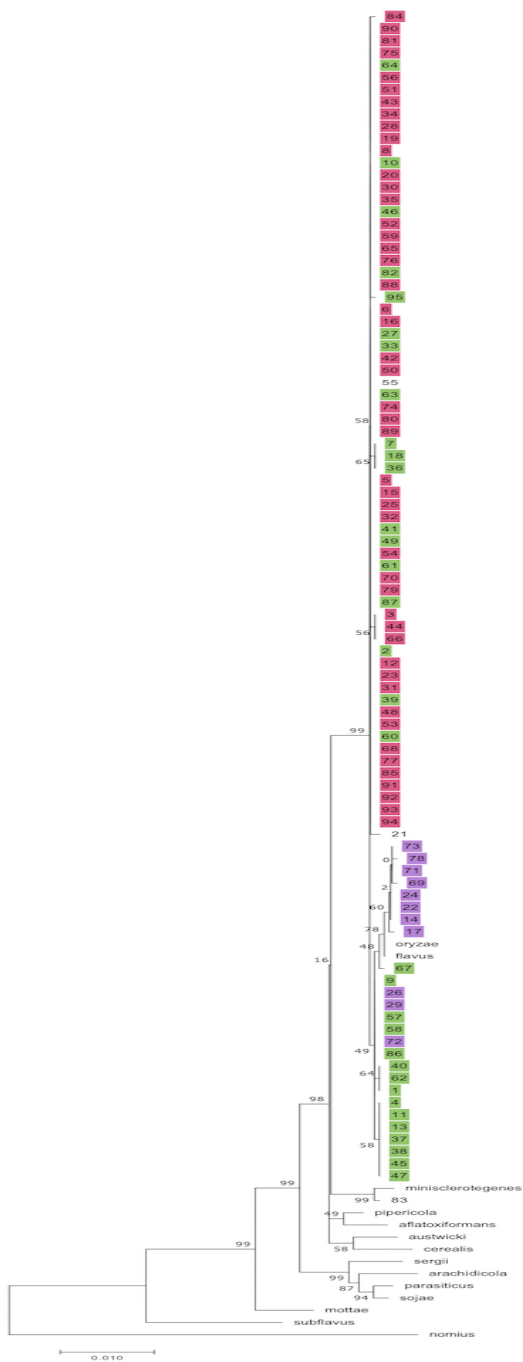

Fig S4. Maximum likelihood tree of concatenated nucleotide sequences of CaM, BenA, RPB2, and the ITS rDNA region from 94 *Aspergillus flavus* isolates sampled across the United States. Data from other species in section Flavi of *Aspergillus* were obtained from Frisvad et al. (23). *A. flavus* isolates from this study have been color-coded to reflect populations A (green), B (red), C (purple) determined from whole-genome sequences. Isolates 21, 55 and 83 are S-strain isolates and were not included in population-level analyses. Isolate 83 was originally determined in this study to be *Aspergillus texensis* (24), but the taxonomy of this species has recently been clarified as *Aspergillus minisclerotigenes* (25). Branch tip labels refer to isolate numbers that are defined in Table S1. Reproduced from Drott et al. (21) with permission.

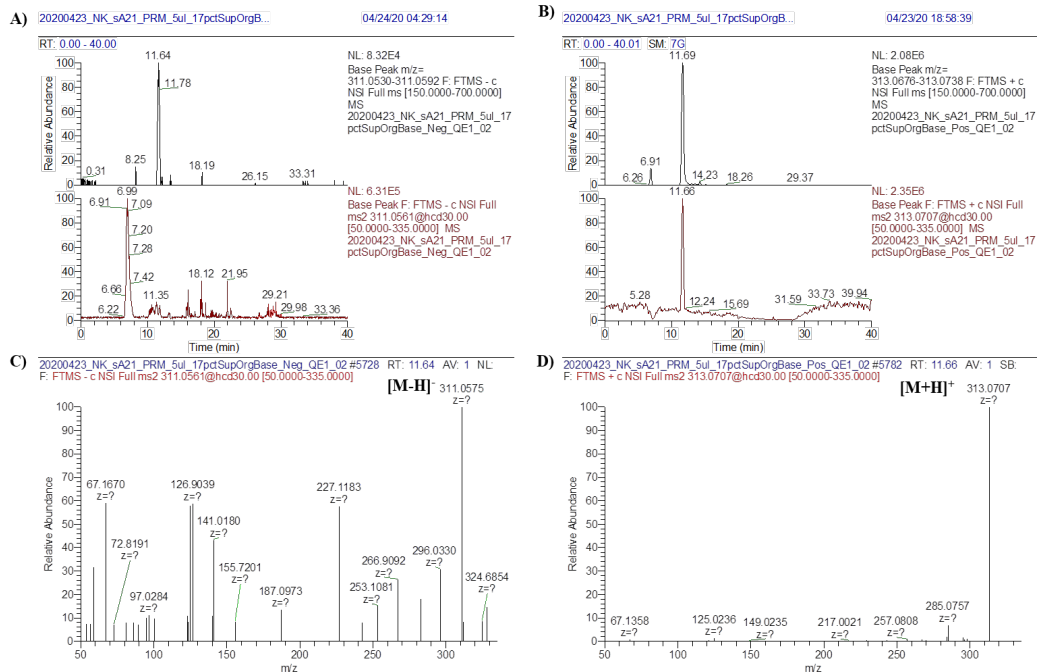

**Fig S5.** Aflatoxin B1 HRMS data; **(A)** ion extract base peak trace from full MS (above) and MS fragmentation (below) negative mode. **(B)** ion extract base peak trace from full MS (above) and MS fragmentation (below) positive mode. Negative fragmentation mass spectrum **(C)** and positive fragmentation mass spectrum **(D)** of aflatoxin B1.

A) 20200423\_NK\_sA21\_PRM\_5ul\_17pdSupOrgBase\_Neg\_QE1\_02 #5728 RT: 11.64 AV: 1 NL  
F: FTMS - c NSI Full ms2 311.0561@hcd30.00 [50.0000-335.0000]

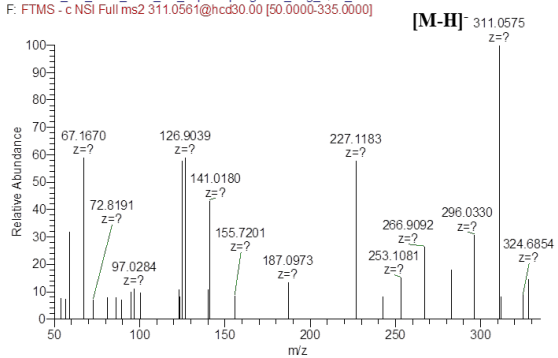

B) 20200423\_NK\_sA21\_PRM\_5ul\_17pdSupOrgBase\_Pos\_QE1\_02 #5782 RT: 11.66 AV: 1 SB  
F: FTMS + c NSI Full ms2 313.0707@hcd30.00 [50.0000-335.0000]

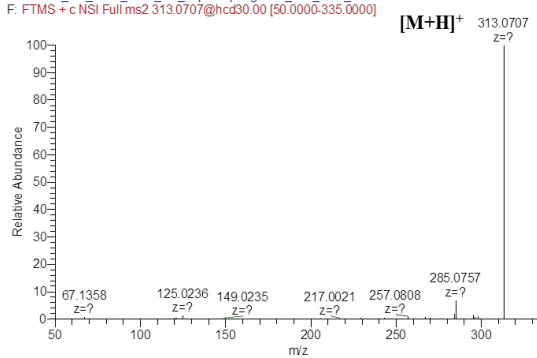

Fig S6. Negative (A) and positive (B) fragmentation mass spectra of aflatoxin B1.

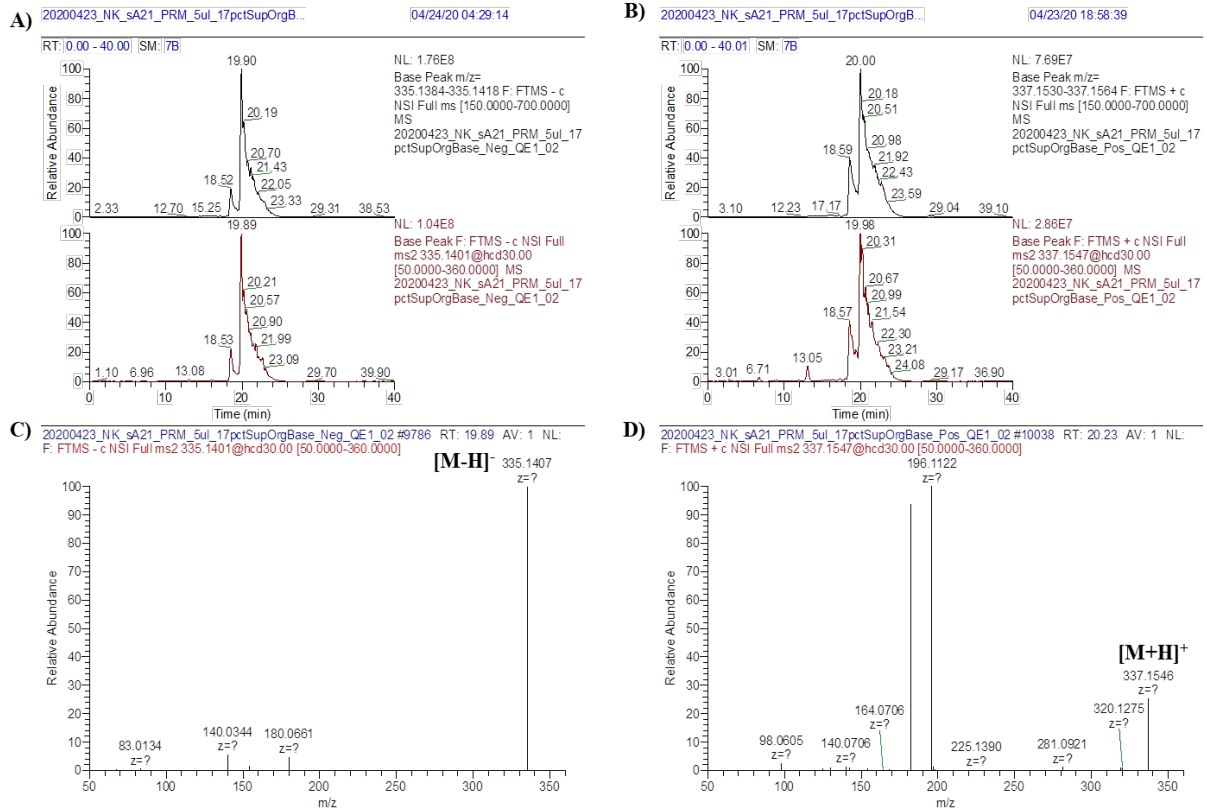

**Fig S7.** Cyclopiazonic acid HRMS data; **(A)** ion extract base peak trace from full MS (above) and MS fragmentation (below) negative mode. **(B)** ion extract base peak trace from full MS (above) and MS fragmentation (below) positive mode. Negative fragmentation mass spectrum **(C)** and positive fragmentation mass spectrum **(D)** of cyclopiazonic acid.

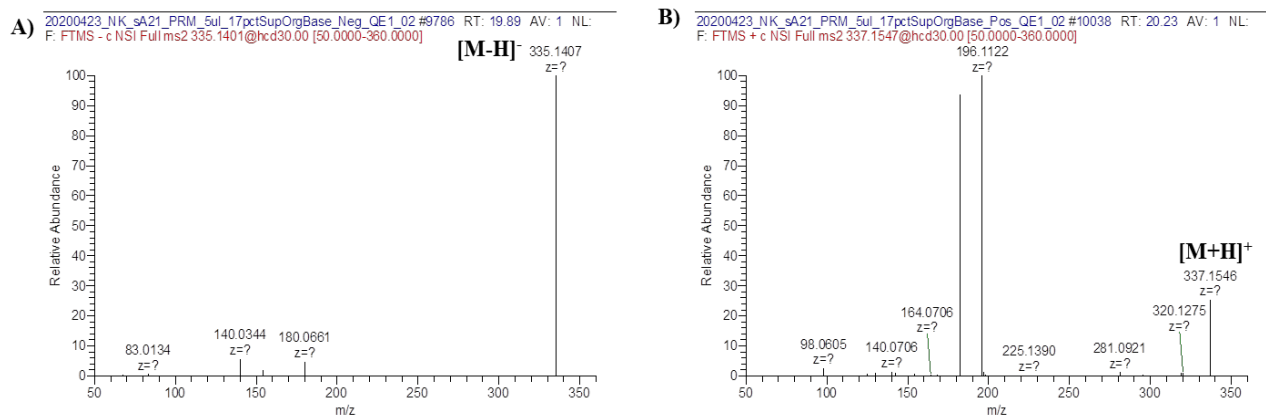

**Fig S8.** Negative (A) and positive (B) fragmentation mass spectra of cyclopiazonic acid.

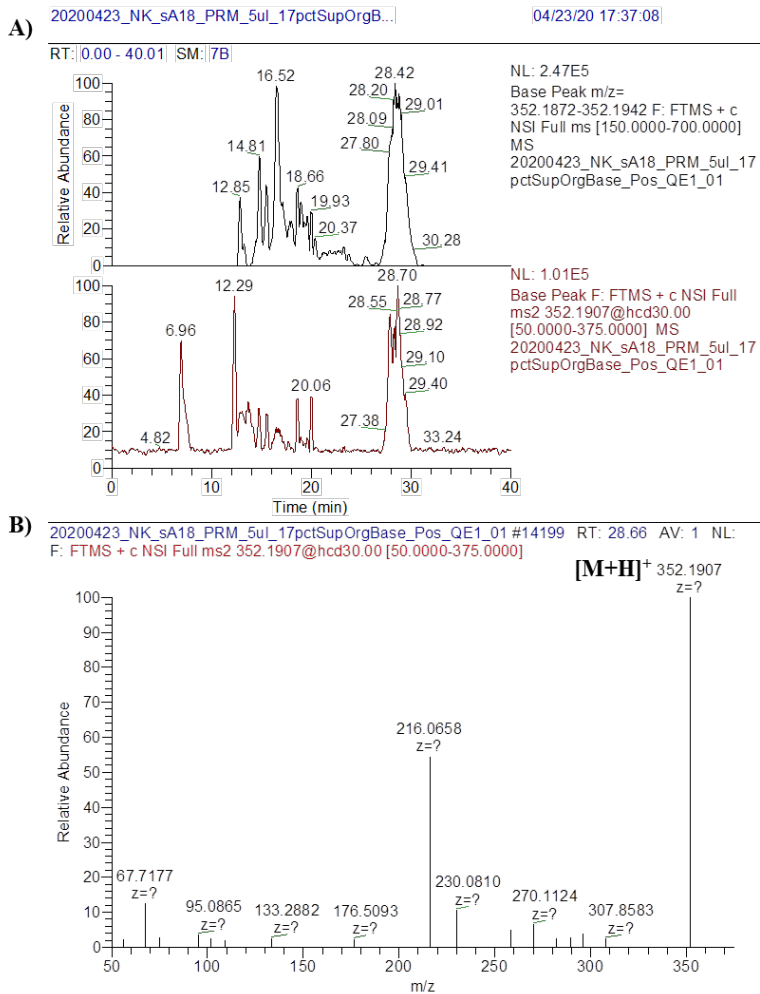

**Fig S9.** Leporin B HRMS data; **(A)** ion extract base peak trace from full MS (above) and MS fragmentation (below) positive mode. **(B)** Positive fragmentation mass spectrum leporin B.

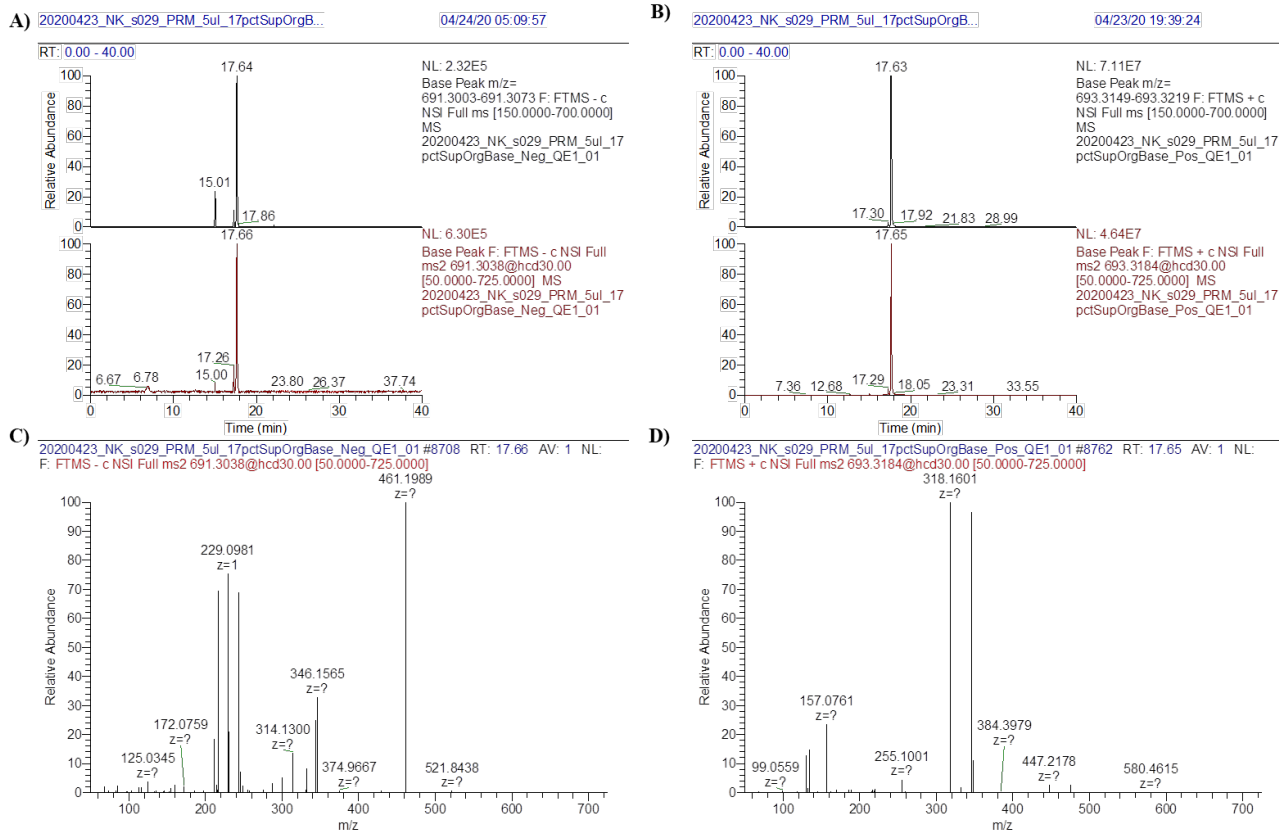

**Fig S10.** Ditryptophenaline HRMS data; (A) ion extract base peak trace from full MS (above) and MS fragmentation (below) negative mode. (B) ion extract base peak trace from full MS (above) and MS fragmentation (below) positive mode. Negative fragmentation mass spectrum (C) and positive fragmentation mass spectrum (D) of ditryptophenaline.

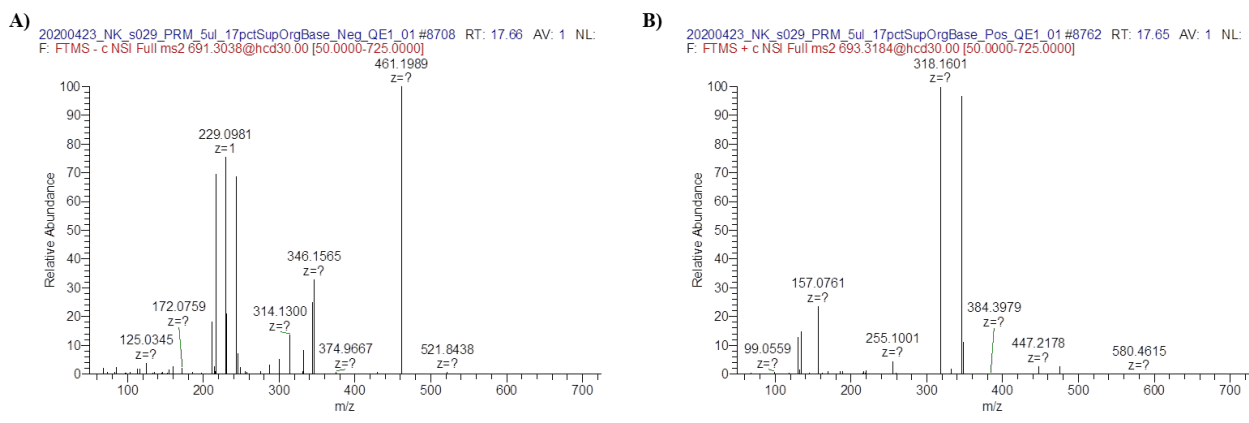

**Fig S11.** Negative (A) and positive (B) fragmentation mass spectra of ditryptophenaline.



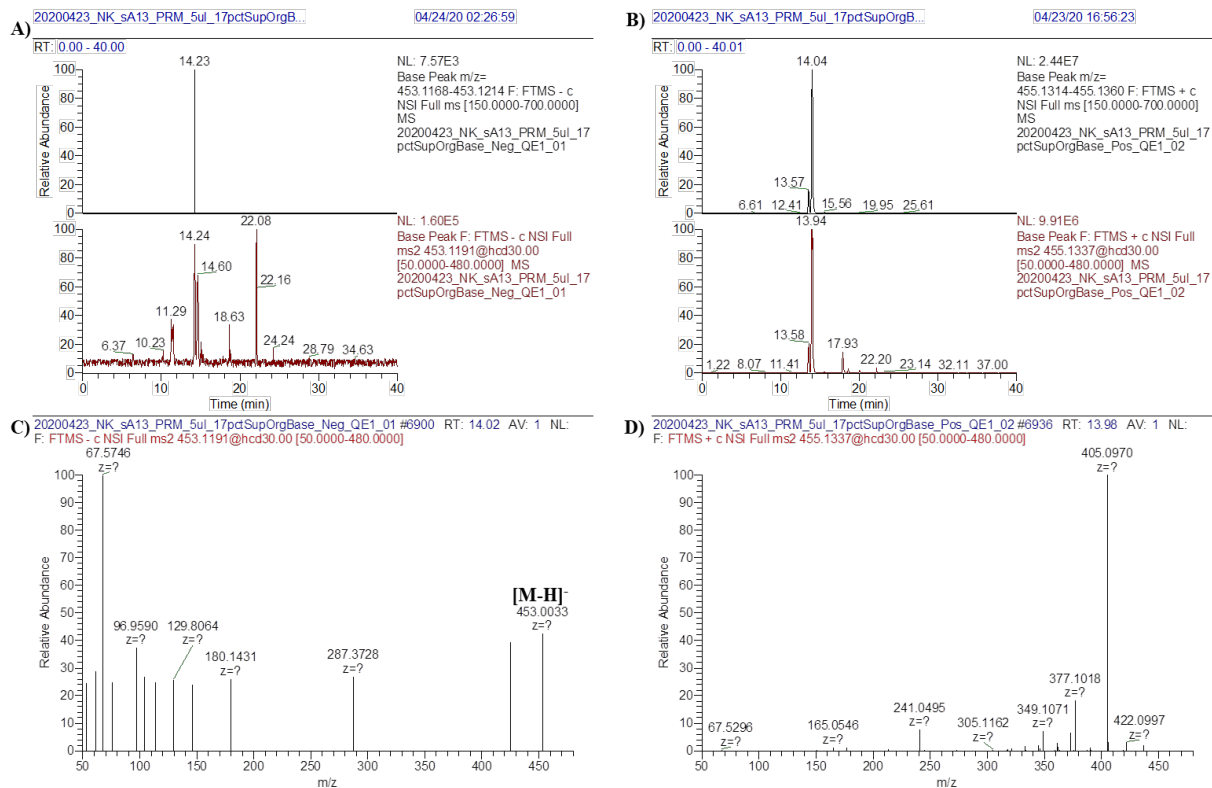

**Fig S12.** Aflavarin HRMS data; (A) ion extract base peak trace from full MS (above) and MS fragmentation (below) negative mode. (B) ion extract base peak trace from full MS (above) and MS fragmentation (below) positive mode. Negative fragmentation mass spectrum (C) and positive fragmentation mass spectrum (D) of aflavarin.

**A)** 20200423\_NK\_sA13\_PRM\_5ul\_17pctSupOrgBase\_Neg\_QE1\_01 #6900 RT: 14.02 AV: 1 NL:  
F: FTMS - c NSI Full ms2 453.1191@hcd30.00 [50.0000-480.0000]

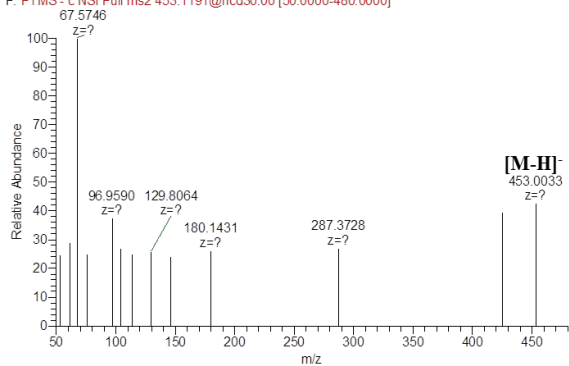

**B)** 20200423\_NK\_sA13\_PRM\_5ul\_17pctSupOrgBase\_Pos\_QE1\_02 #6936 RT: 13.98 AV: 1 NL:  
F: FTMS + c NSI Full ms2 455.1337@hcd30.00 [50.0000-480.0000]

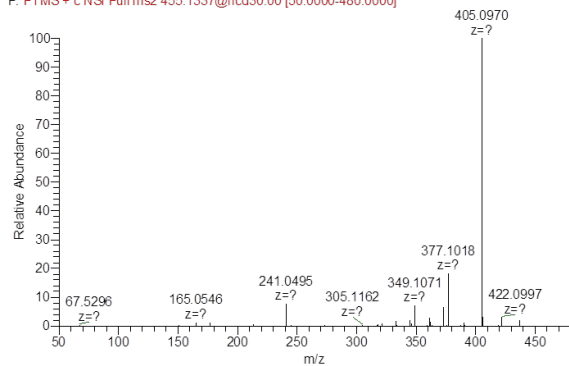

**Fig S13.** Negative (A) and positive (B) fragmentation mass spectra of aflavarin.

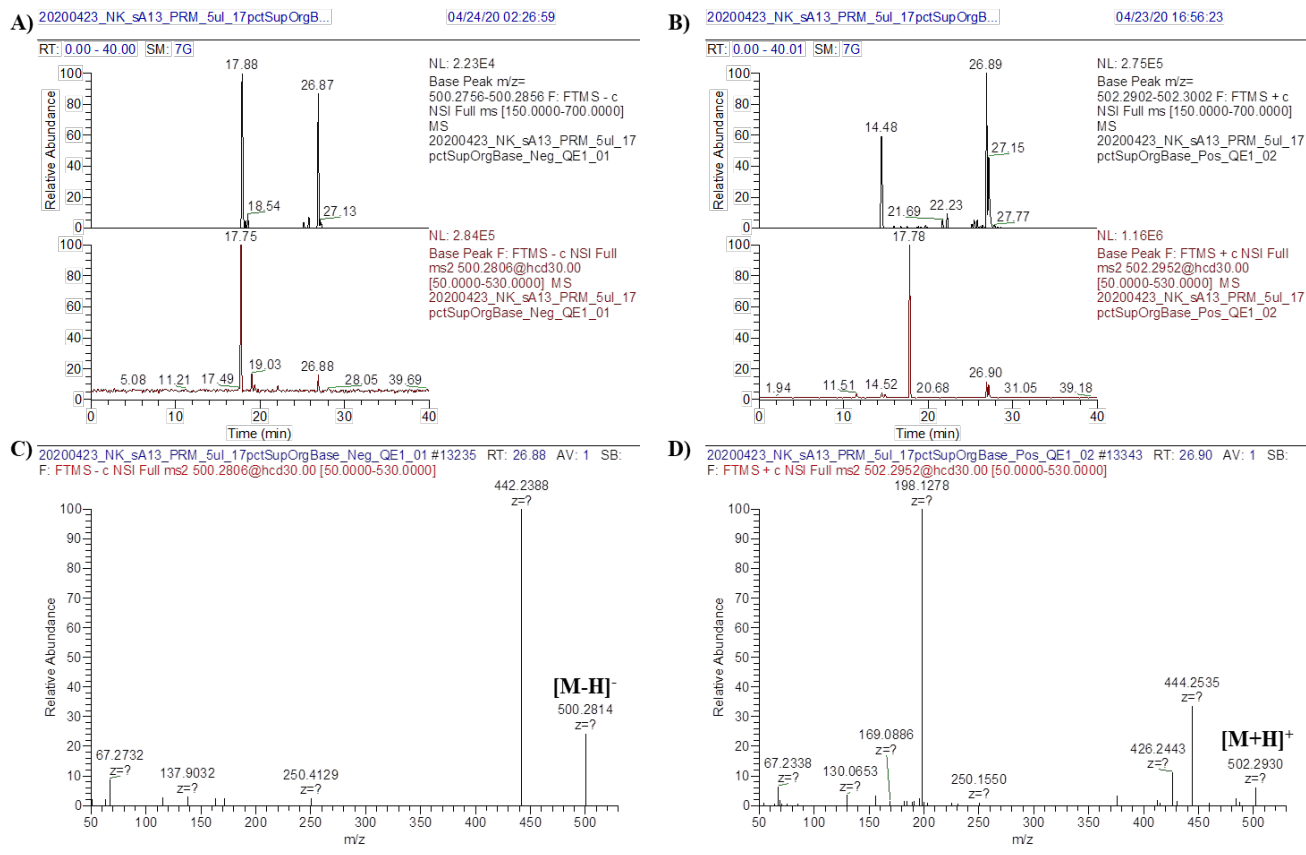

**Fig S14.** Aflatrem HRMS data; (A) ion extract base peak trace from full MS (above) and MS fragmentation (below) negative mode. (B) ion extract base peak trace from full MS (above) and MS fragmentation (below) positive mode. Negative fragmentation mass spectrum (C) and positive fragmentation mass spectrum (D) of aflatrem.

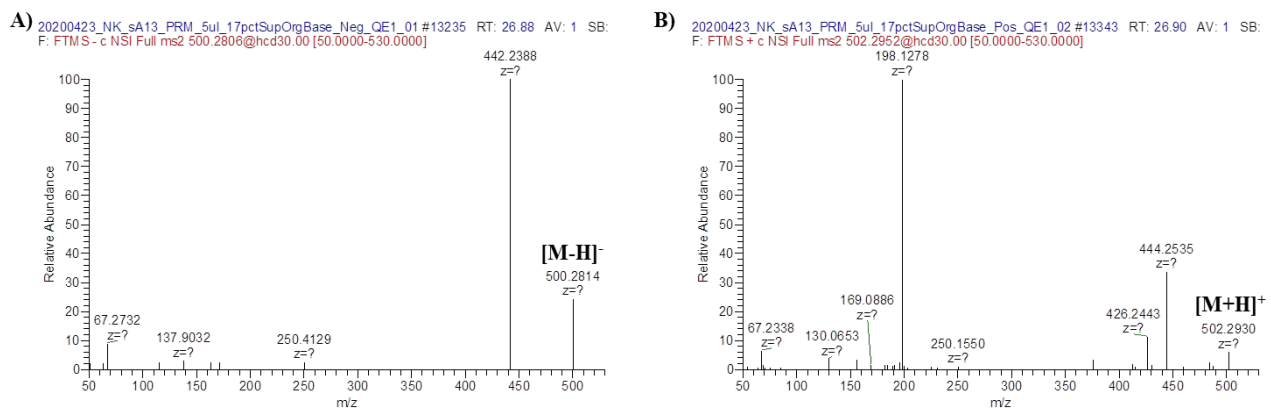

**Fig S15.** Negative (A) and positive (B) fragmentation mass spectra of aflatrem.

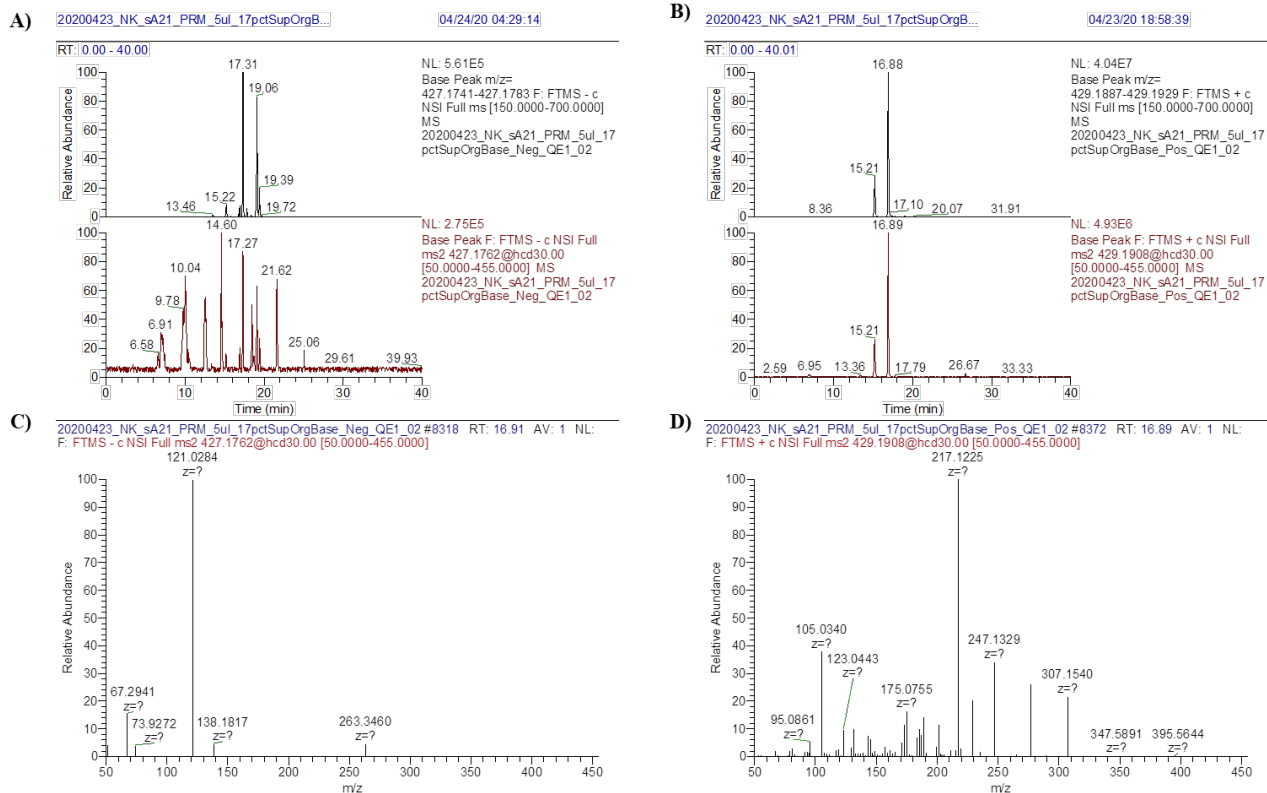

**Fig S16.** 14-Deacetyl astellolide A HRMS data; (A) ion extract base peak trace from full MS (above) and MS fragmentation (below) negative mode. (B) ion extract base peak trace from full MS (above) and MS fragmentation (below) positive mode. Negative fragmentation mass spectrum (C) and positive fragmentation mass spectrum (D) of 14-deacetyl astellolide A.

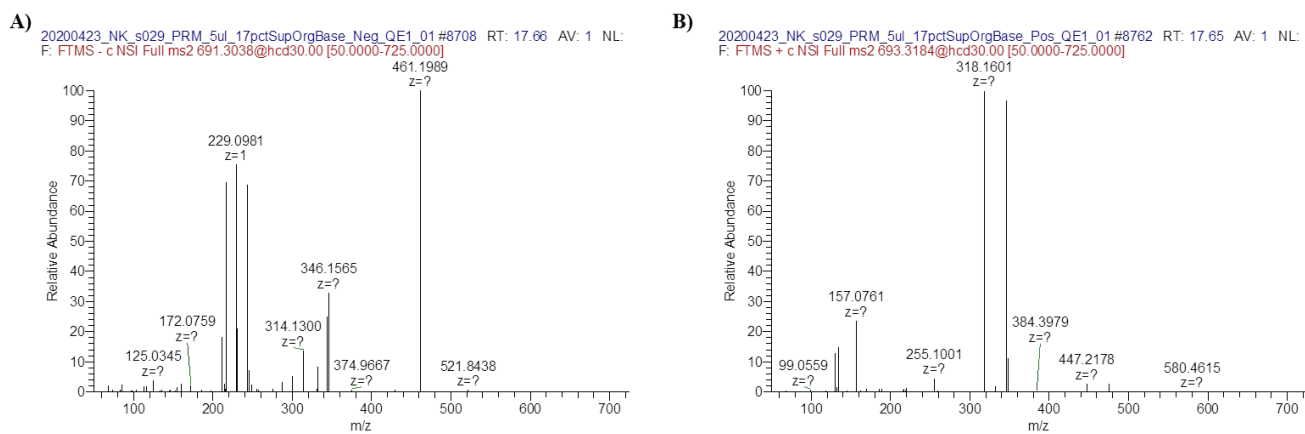

**Fig S17.** Negative (A) and positive (B) fragmentation mass spectra of 14-deacetyl astellolide A.

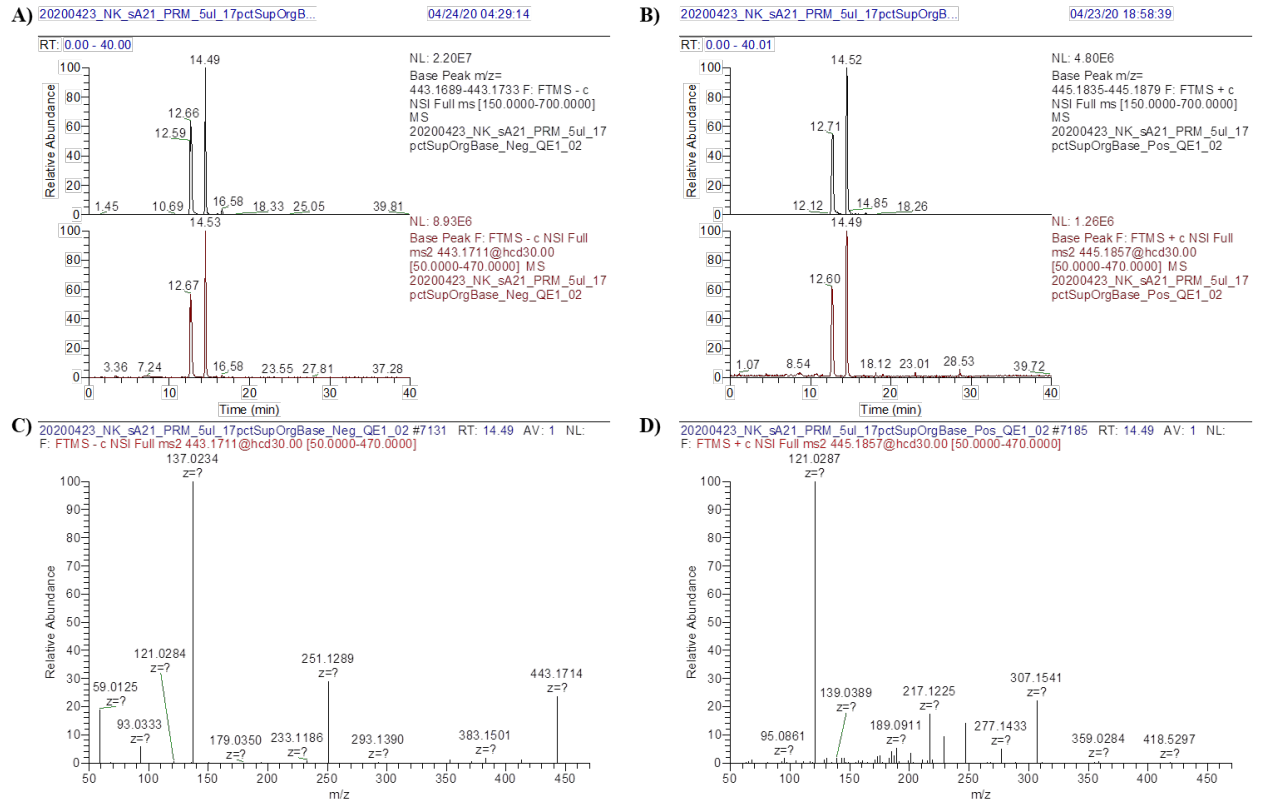

**Fig S18.** 14-Deacetyl astellolide B HRMS data; (A) ion extract base peak trace from full MS (above) and MS fragmentation (below) negative mode. (B) ion extract base peak trace from full MS (above) and MS fragmentation (below) positive mode. Negative fragmentation mass spectrum (C) and positive fragmentation mass spectrum (D) of 14-deacetyl astellolide B.

A) 20200423\_NK\_sA21\_PRM\_5ul\_17pctSupOrgBase\_Neg\_QE1\_02 #7131 RT: 14.49 AV: 1 NL:  
F: FTMS - c NSI Full ms2 443.1711@hcd30.00 [50.0000-470.0000]

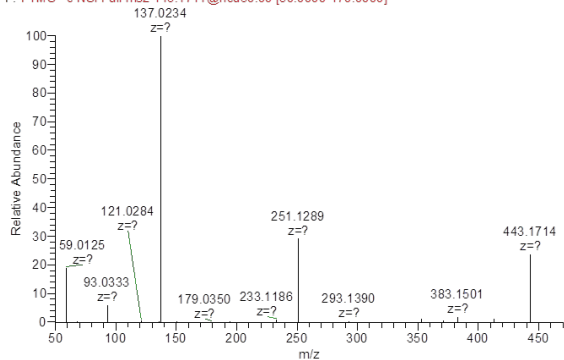

B) 20200423\_NK\_sA21\_PRM\_5ul\_17pctSupOrgBase\_Pos\_QE1\_02 #7185 RT: 14.49 AV: 1 NL:  
F: FTMS + c NSI Full ms2 445.1857@hcd30.00 [50.0000-470.0000]

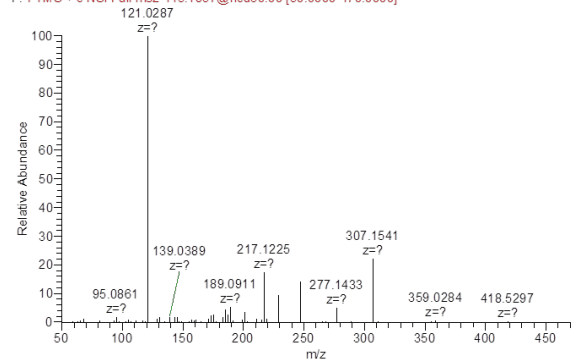

Fig S19. Negative (A) and positive (B) fragmentation mass spectra of 14-deacetyl astellolide B.



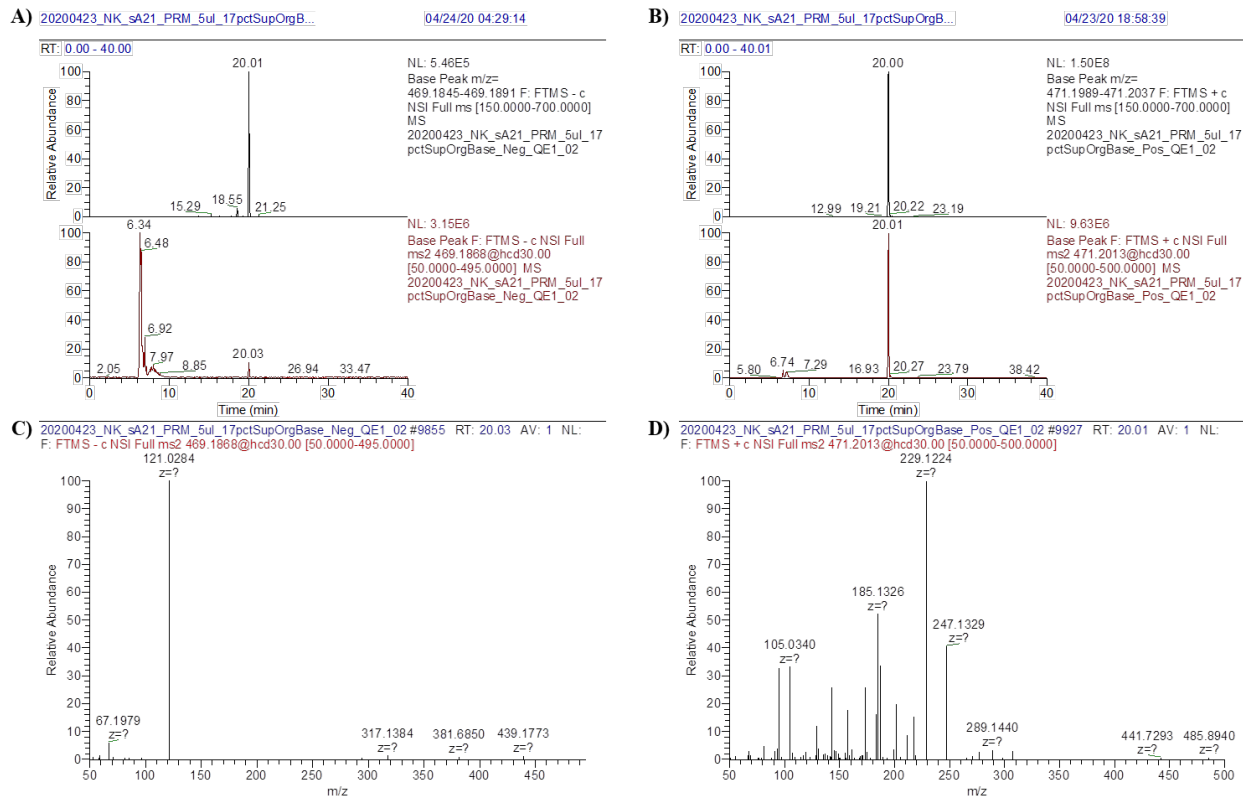

**Fig S20.** Astellolide A HRMS data; (A) ion extract base peak trace from full MS (above) and MS fragmentation (below) negative mode. (B) ion extract base peak trace from full MS (above) and MS fragmentation (below) positive mode. Negative fragmentation mass spectrum (C) and positive fragmentation mass spectrum (D) of astellolide A.

**A)** 20200423\_NK\_sA21\_PRM\_5ul\_17pctSupOrgBase\_Neg\_QE1\_02 #9855 RT: 20.03 AV: 1 NL:  
F: FTMS - c NSI Full ms2 469.186@hcd30.00 [50.0000-495.0000]

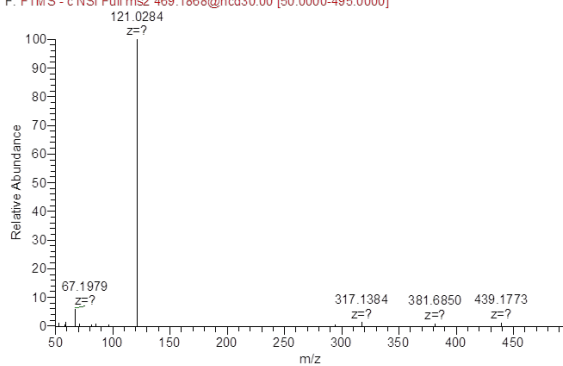

**B)** 20200423\_NK\_sA21\_PRM\_5ul\_17pctSupOrgBase\_Pos\_QE1\_02 #9927 RT: 20.01 AV: 1 NL:  
F: FTMS + c NSI Full ms2 471.2013@hcd30.00 [50.0000-500.0000]

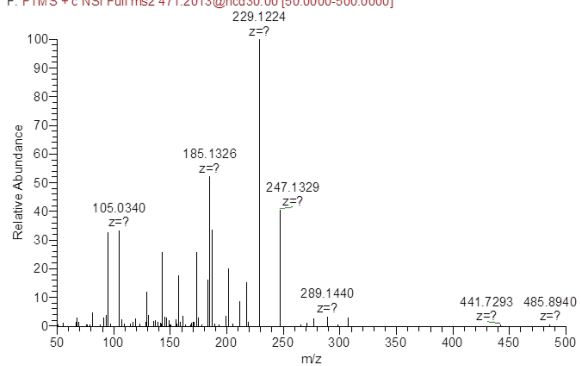

**Fig S21.** Negative (A) and positive (B) fragmentation mass spectra of astellolide A.

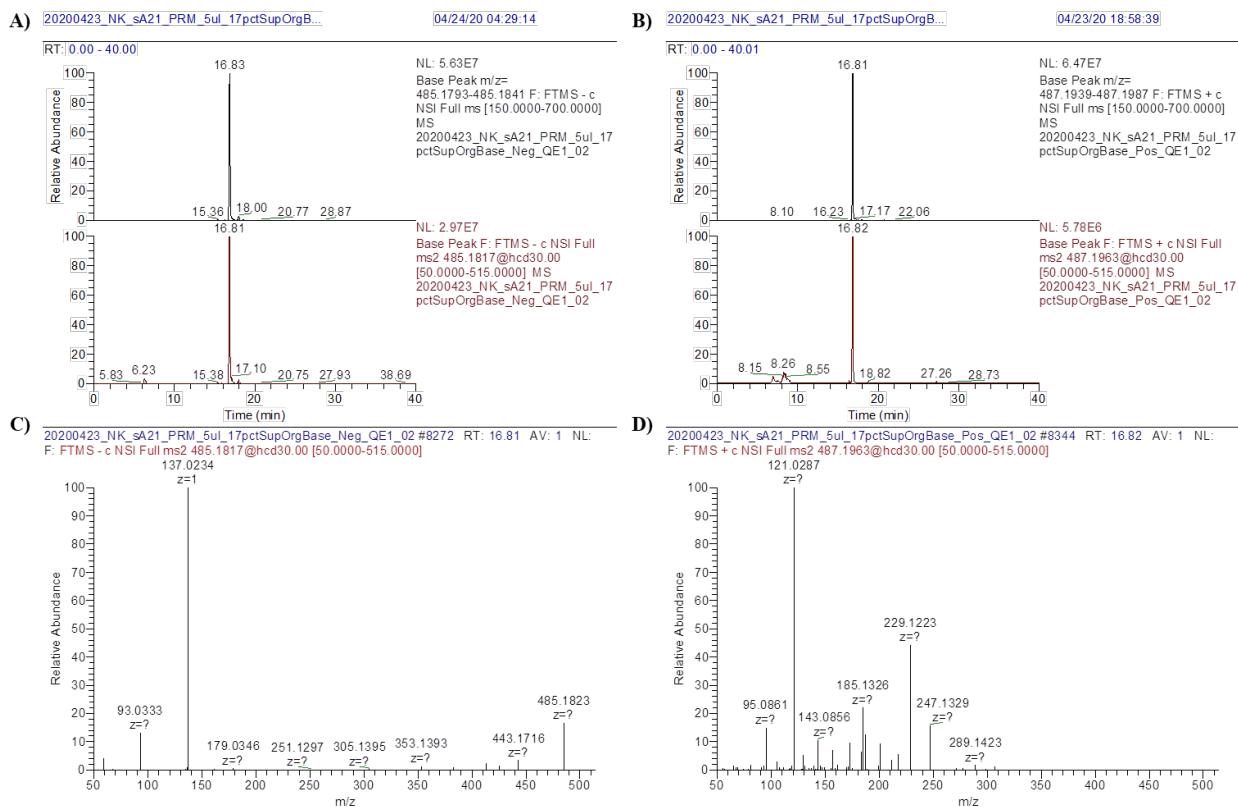

**Fig S22.** Astellolide B HRMS data; (A) ion extract base peak trace from full MS (above) and MS fragmentation (below) negative mode. (B) ion extract base peak trace from full MS (above) and MS fragmentation (below) positive mode. Negative fragmentation mass spectrum (C) and positive fragmentation mass spectrum (D) of astellolide B.

**A)** 20200423\_NK\_sA21\_PRM\_5uL\_17pctSupOrgBase\_Neg\_QE1\_02 #8272 RT: 16.81 AV: 1 NL: F: FTMS -c NSI Full ms2 485.1817@hcd30.00 [50.0000-515.0000]

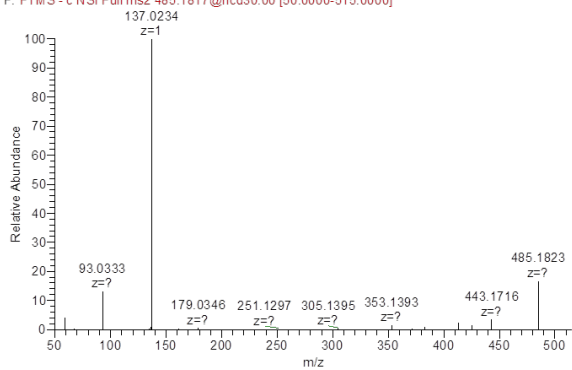

**B)** 20200423\_NK\_sA21\_PRM\_5uL\_17pctSupOrgBase\_Pos\_QE1\_02 #8344 RT: 16.82 AV: 1 NL: F: FTMS +c NSI Full ms2 487.1963@hcd30.00 [50.0000-515.0000]

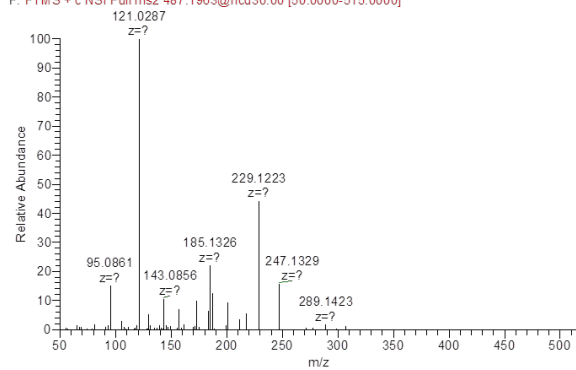

**Fig S23.** Negative (A) and positive (B) fragmentation mass spectra of astellolide B.

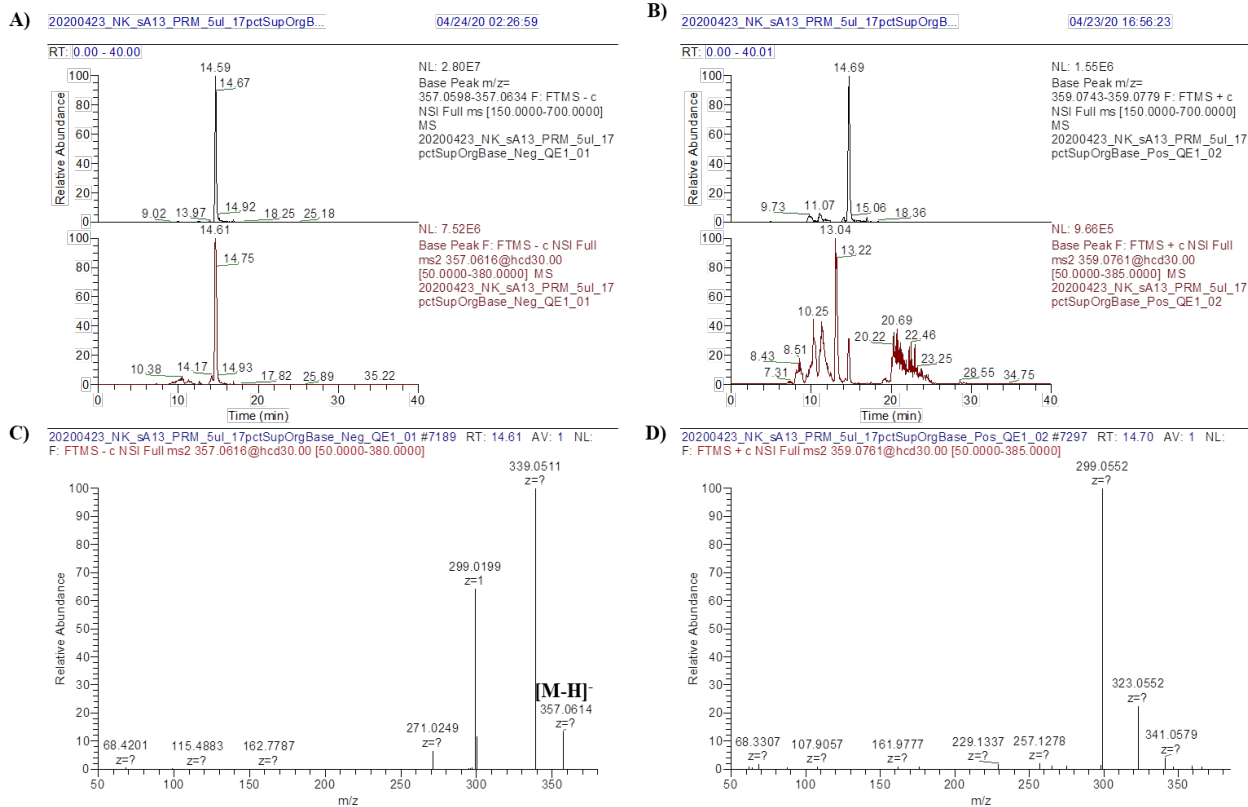

**Fig S24.** Asparasone A HRMS data; (A) ion extract base peak trace from full MS (above) and MS fragmentation (below) negative mode. (B) ion extract base peak trace from full MS (above) and MS fragmentation (below) positive mode. Negative fragmentation mass spectrum (C) and positive fragmentation mass spectrum (D) of asparasone A.

**A)** 20200423\_NK\_sA13\_PRM\_5ul\_17pctSupOrgBase\_Neg\_QE1\_01 #7189 RT: 14.61 AV: 1 NL:  
F: FTMS -c NSI Full ms2 357.0616@hcd30.00 [50.0000-380.0000]

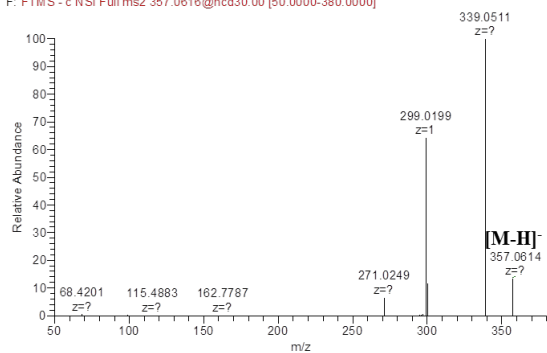

**B)** 20200423\_NK\_sA13\_PRM\_5ul\_17pctSupOrgBase\_Pos\_QE1\_02 #7297 RT: 14.70 AV: 1 NL:  
F: FTMS +c NSI Full ms2 359.0761@hcd30.00 [50.0000-385.0000]

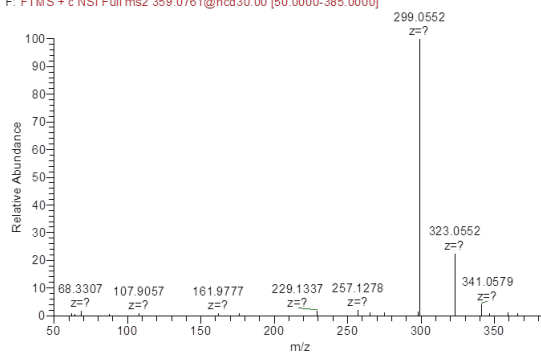

**Fig S25.** Negative (A) and positive (B) fragmentation mass spectra of asparasone A.

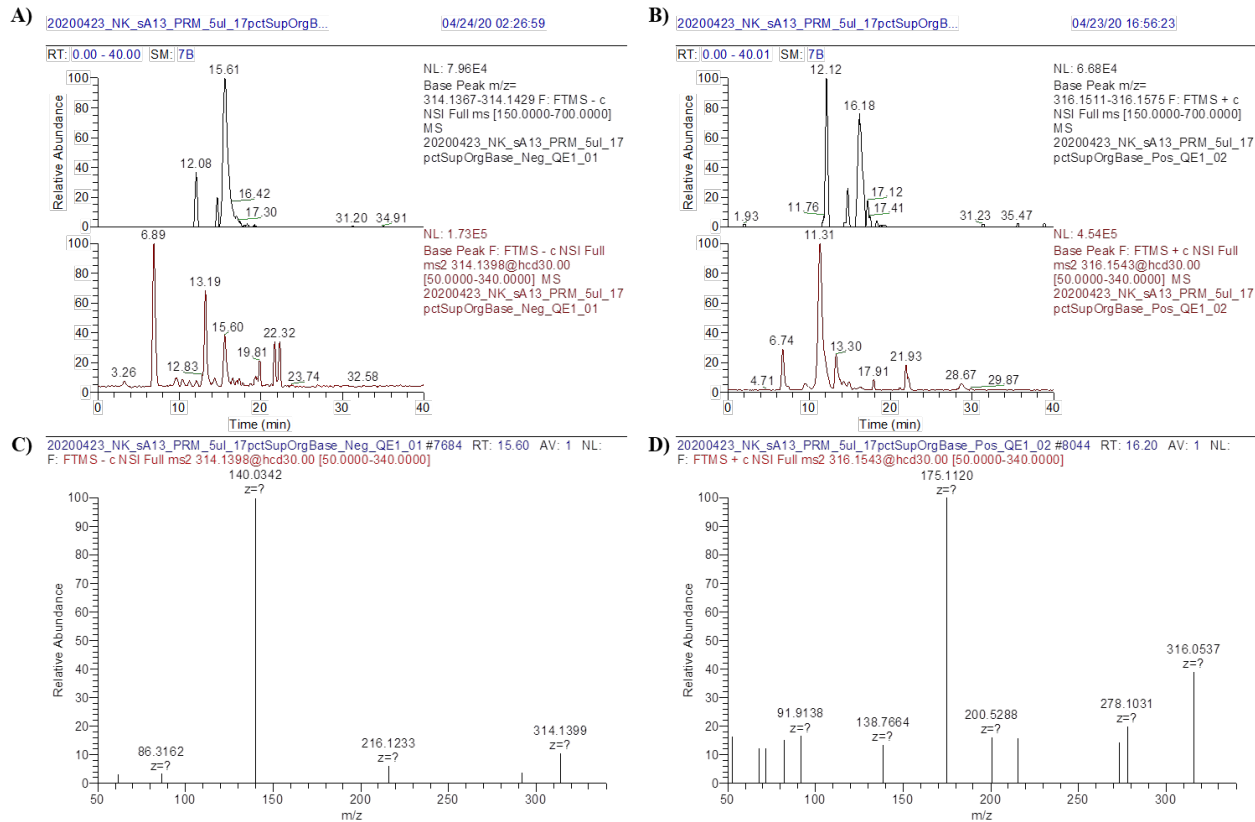

**Fig S26.** Piperazine HRMS data; (A) ion extract base peak trace from full MS (above) and MS fragmentation (below) negative mode. (B) ion extract base peak trace from full MS (above) and MS fragmentation (below) positive mode. Negative fragmentation mass spectrum (C) and positive fragmentation mass spectrum (D) of piperazine.

**A)** 20200423\_NK\_sA13\_PRM\_5ul\_17pctSupOrgBase\_Neg\_QE1\_01 #7684 RT: 15.60 AV: 1 NL:  
F: FTMS - c NSI Full ms2 314.1398@hcd30.00 [50.0000-340.0000]

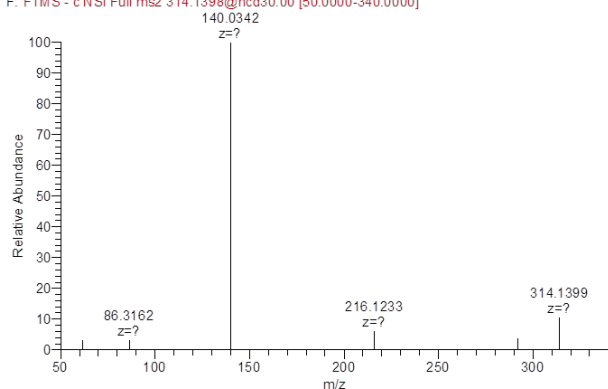

**B)** 20200423\_NK\_sA13\_PRM\_5ul\_17pctSupOrgBase\_Pos\_QE1\_02 #8044 RT: 16.20 AV: 1 NL:  
F: FTMS + c NSI Full ms2 316.1543@hcd30.00 [50.0000-340.0000]

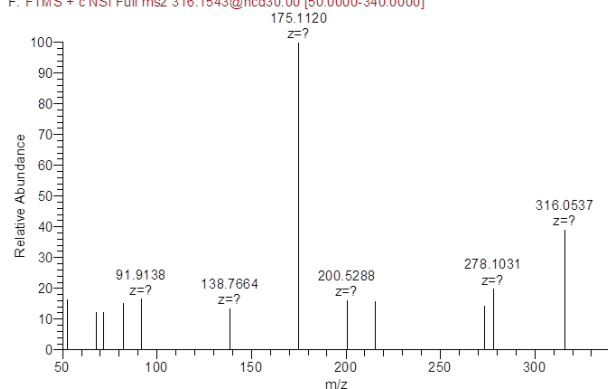

**Fig S27.** Negative (A) and positive (B) fragmentation mass spectra of piperazine.



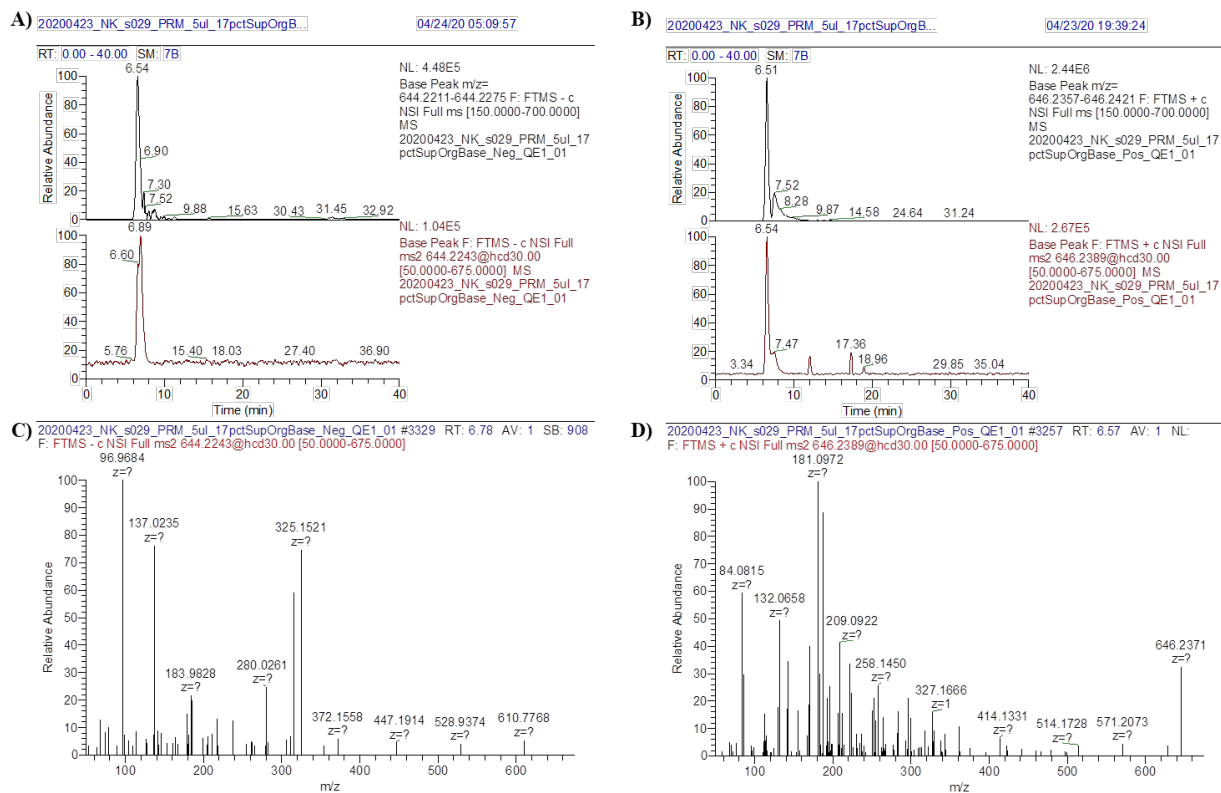

**Fig S28.** Ustiloxin B HRMS data; (A) ion extract base peak trace from full MS (above) and MS fragmentation (below) negative mode. (B) ion extract base peak trace from full MS (above) and MS fragmentation (below) positive mode. Negative fragmentation mass spectrum (C) and positive fragmentation mass spectrum (D) of ustiloxin B.

**A)** 20200423\_NK\_s029\_PRM\_5ul\_17pctSupOrgBase\_Neg\_QE1\_01 #3329 RT: 6.78 AV: 1 SB: 908  
F: FTMS - c NSI Full ms2 644.2243@hcd30.00 [50.0000-675.0000]

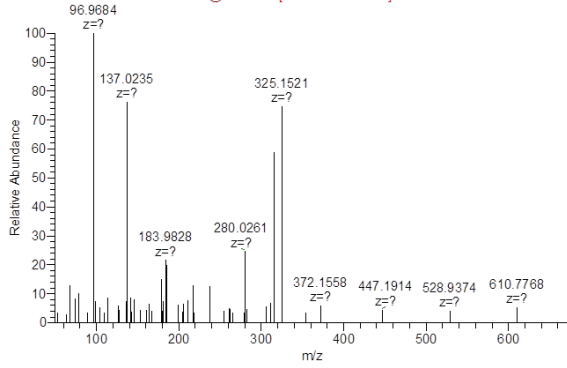

**B)** 20200423\_NK\_s029\_PRM\_5ul\_17pctSupOrgBase\_Pos\_QE1\_01 #3257 RT: 6.57 AV: 1 NL:  
F: FTMS + c NSI Full ms2 646.2389@hcd30.00 [50.0000-675.0000]

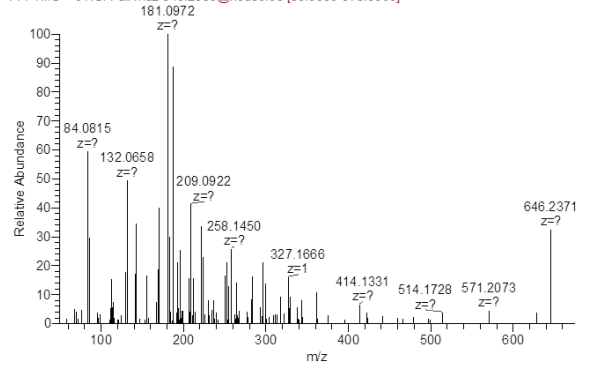

**Fig S29.** Negative (A) and positive (B) fragmentation mass spectra of ustiloxin B.

**Table S1.** Isolates used in this study from Drott et al. (21): their geographic origins, aflatoxin chemotypes, population assignment and sclerotial morphotype.

| Isolate Number (mAF) | Isolate name             | Geographic Origin | Chemotype         | Population | Sclerotial Morphotype | Species          |
|----------------------|--------------------------|-------------------|-------------------|------------|-----------------------|------------------|
| 1                    | AF36 <sup>1,2</sup>      | Arizona           | Non-Aflatoxigenic | A          | L-type                | <i>A. flavus</i> |
| 2                    | NRRL3357 <sup>2,3</sup>  | Unknown           | Aflatoxigenic     | A          | L-type                | <i>A. flavus</i> |
| 3                    | FL-A-11-1                | Florida           | Non-Aflatoxigenic | B          | L-type                | <i>A. flavus</i> |
| 4                    | FL-A-12-3                | Florida           | Aflatoxigenic     | A          | L-type                | <i>A. flavus</i> |
| 5                    | FL-A-15-3                | Florida           | Aflatoxigenic     | B          | L-type                | <i>A. flavus</i> |
| 6                    | FL-A-22-1                | Florida           | Non-Aflatoxigenic | B          | L-type                | <i>A. flavus</i> |
| 7                    | FL-A-22-2                | Florida           | Non-Aflatoxigenic | A          | L-type                | <i>A. flavus</i> |
| 8                    | FL-A-24-1                | Florida           | Non-Aflatoxigenic | B          | L-type                | <i>A. flavus</i> |
| 9                    | FL-B-1-1                 | Florida           | Aflatoxigenic     | A          | L-type                | <i>A. flavus</i> |
| 10                   | FL-B-11-1                | Florida           | Aflatoxigenic     | A          | L-type                | <i>A. flavus</i> |
| 11                   | FL-B-14-1                | Florida           | Aflatoxigenic     | A          | L-type                | <i>A. flavus</i> |
| 12                   | FL-B-17-1-S <sup>4</sup> | Florida           | Aflatoxigenic     | n/a        | S-type                | <i>A. flavus</i> |
| 13                   | FL-B-21-1                | Florida           | Aflatoxigenic     | A          | L-type                | <i>A. flavus</i> |
| 14                   | FL-B-25-1                | Florida           | Non-Aflatoxigenic | C          | L-type                | <i>A. flavus</i> |
| 15                   | FL-C-1-2                 | Florida           | Non-Aflatoxigenic | B          | L-type                | <i>A. flavus</i> |
| 16                   | FL-C-4-1                 | Florida           | Aflatoxigenic     | B          | L-type                | <i>A. flavus</i> |
| 17                   | FL-C-13-1                | Florida           | Non-Aflatoxigenic | C          | L-type                | <i>A. flavus</i> |
| 18                   | FL-C-15-1 <sup>4</sup>   | Florida           | Aflatoxigenic     | A          | L-type                | <i>A. flavus</i> |
| 19                   | FL-C-18-1                | Florida           | Non-Aflatoxigenic | B          | L-type                | <i>A. flavus</i> |
| 20                   | FL-C-24-1 <sup>4</sup>   | Florida           | Non-Aflatoxigenic | B          | L-type                | <i>A. flavus</i> |
| 21                   | IA-B-14-1                | Iowa              | Non-Aflatoxigenic | B          | L-type                | <i>A. flavus</i> |
| 22                   | IA-C-8-1                 | Iowa              | Non-Aflatoxigenic | C          | L-type                | <i>A. flavus</i> |
| 23                   | IA-C-9-1                 | Iowa              | Non-Aflatoxigenic | B          | L-type                | <i>A. flavus</i> |
| 24                   | IA-C-15-1 <sup>4</sup>   | Iowa              | Non-Aflatoxigenic | C          | L-type                | <i>A. flavus</i> |
| 25                   | IA-C-20-1                | Iowa              | Aflatoxigenic     | B          | L-type                | <i>A. flavus</i> |
| 26                   | IN-B-12-1                | Iowa              | Non-Aflatoxigenic | C          | L-type                | <i>A. flavus</i> |
| 27                   | IN-B-19-1                | Iowa              | Aflatoxigenic     | A          | L-type                | <i>A. flavus</i> |
| 28                   | IN-C-14-1                | Iowa              | Aflatoxigenic     | B          | L-type                | <i>A. flavus</i> |
| 29                   | IN-C-14-2 <sup>4</sup>   | Iowa              | Aflatoxigenic     | C          | L-type                | <i>A. flavus</i> |
| 30                   | NC-A-1-3-1               | North Carolina    | Non-Aflatoxigenic | B          | L-type                | <i>A. flavus</i> |
| 31                   | NC-A-1-8B-1              | North Carolina    | Non-Aflatoxigenic | B          | L-type                | <i>A. flavus</i> |
| 32                   | NC-A-2-3-2               | North Carolina    | Non-Aflatoxigenic | B          | L-type                | <i>A. flavus</i> |
| 33                   | NC-A-3-5-1 <sup>4</sup>  | North Carolina    | Non-Aflatoxigenic | A          | L-type                | <i>A. flavus</i> |
| 34                   | NC-A-4-6B-2              | North Carolina    | Non-Aflatoxigenic | B          | L-type                | <i>A. flavus</i> |
| 35                   | NC-B-1-3-1               | North Carolina    | Aflatoxigenic     | B          | L-type                | <i>A. flavus</i> |
| 36                   | NC-D-1-5-1               | North Carolina    | Non-Aflatoxigenic | A          | L-type                | <i>A. flavus</i> |
| 37                   | NC-D-2-2-2               | North Carolina    | Non-Aflatoxigenic | A          | L-type                | <i>A. flavus</i> |
| 38                   | NC-D-2-6-1               | North Carolina    | Non-Aflatoxigenic | A          | L-type                | <i>A. flavus</i> |
| 39                   | NC-D-2-1B-1              | North Carolina    | Non-Aflatoxigenic | A          | L-type                | <i>A. flavus</i> |
| 40                   | NC-D-4-4-1               | North Carolina    | Aflatoxigenic     | A          | L-type                | <i>A. flavus</i> |
| 41                   | NC-D-4-8-1               | North Carolina    | Aflatoxigenic     | A          | L-type                | <i>A. flavus</i> |
| 42                   | NC-E-2-1                 | North Carolina    | Aflatoxigenic     | B          | L-type                | <i>A. flavus</i> |
| 43                   | NC-E-5-1                 | North Carolina    | Non-Aflatoxigenic | B          | L-type                | <i>A. flavus</i> |
| 44                   | NC-E-5-3                 | North Carolina    | Non-Aflatoxigenic | B          | L-type                | <i>A. flavus</i> |
| 45                   | NC-E-6-1                 | North Carolina    | Non-Aflatoxigenic | A          | L-type                | <i>A. flavus</i> |
| 46                   | NC-E-6-3                 | North Carolina    | Aflatoxigenic     | A          | L-type                | <i>A. flavus</i> |
| 47                   | NC-E-7-1                 | North Carolina    | Aflatoxigenic     | A          | L-type                | <i>A. flavus</i> |
| 48                   | NC-E-14-2                | North Carolina    | Non-Aflatoxigenic | B          | L-type                | <i>A. flavus</i> |
| 49                   | NC-E-14-3                | North Carolina    | Aflatoxigenic     | A          | L-type                | <i>A. flavus</i> |
| 50                   | NC-E-16-1                | North Carolina    | Non-Aflatoxigenic | B          | L-type                | <i>A. flavus</i> |
| 51                   | NC-E-17-3                | North Carolina    | Aflatoxigenic     | B          | L-type                | <i>A. flavus</i> |
| 52                   | NC-E-25-1                | North Carolina    | Non-Aflatoxigenic | B          | L-type                | <i>A. flavus</i> |
| 53                   | NC-E-25-3                | North Carolina    | Aflatoxigenic     | B          | L-type                | <i>A. flavus</i> |
| 54                   | IA-B-14-1                | Iowa              | Non-Aflatoxigenic | B          | L-type                | <i>A. flavus</i> |
| 55                   | OK-A-8-1-S <sup>4</sup>  | Oklahoma          | Aflatoxigenic     | n/a        | S-type                | <i>A. flavus</i> |

|    |                         |                |                   |     |        |                                          |
|----|-------------------------|----------------|-------------------|-----|--------|------------------------------------------|
| 56 | OK-A-15-2               | Oklahoma       | Non-Aflatoxigenic | B   | L-type | <i>A. flavus</i>                         |
| 57 | OK-A-17-1               | Oklahoma       | Aflatoxigenic     | A   | L-type | <i>A. flavus</i>                         |
| 58 | OK-B-4-1-1              | Oklahoma       | Aflatoxigenic     | A   | L-type | <i>A. flavus</i>                         |
| 59 | FL-B-18-3               | Florida        | Non-Aflatoxigenic | B   | L-type | <i>A. flavus</i>                         |
| 60 | OK-B-6-1 <sup>4</sup>   | Oklahoma       | Aflatoxigenic     | A   | L-type | <i>A. flavus</i>                         |
| 61 | OK-B-7-1                | Oklahoma       | Aflatoxigenic     | A   | L-type | <i>A. flavus</i>                         |
| 62 | OK-B-13-1               | Oklahoma       | Aflatoxigenic     | A   | L-type | <i>A. flavus</i>                         |
| 63 | OK-B-14-2               | Oklahoma       | Aflatoxigenic     | A   | L-type | <i>A. flavus</i>                         |
| 64 | OK-B-17-1               | Oklahoma       | Aflatoxigenic     | A   | L-type | <i>A. flavus</i>                         |
| 65 | PA-A-6-1                | Pennsylvania   | Non-Aflatoxigenic | B   | L-type | <i>A. flavus</i>                         |
| 66 | PA-B-1-1                | Pennsylvania   | Aflatoxigenic     | B   | L-type | <i>A. flavus</i>                         |
| 67 | PA-B-1-2                | Pennsylvania   | Non-Aflatoxigenic | A   | L-type | <i>A. flavus</i>                         |
| 68 | PA-B-4-1 <sup>4</sup>   | Pennsylvania   | Aflatoxigenic     | B   | L-type | <i>A. flavus</i>                         |
| 69 | PA-B-11-1               | Pennsylvania   | Non-Aflatoxigenic | C   | L-type | <i>A. flavus</i>                         |
| 70 | PA-B-12-1               | Pennsylvania   | Non-Aflatoxigenic | B   | L-type | <i>A. flavus</i>                         |
| 71 | PA-B-14-2 <sup>4</sup>  | Pennsylvania   | Non-Aflatoxigenic | C   | L-type | <i>A. flavus</i>                         |
| 72 | PA-B-16-2               | Pennsylvania   | Aflatoxigenic     | C   | L-type | <i>A. flavus</i>                         |
| 73 | PA-B-16-3               | Pennsylvania   | Non-Aflatoxigenic | C   | L-type | <i>A. flavus</i>                         |
| 74 | PA-B-20-1               | Pennsylvania   | Non-Aflatoxigenic | B   | L-type | <i>A. flavus</i>                         |
| 75 | PA-B-20-3               | Pennsylvania   | Aflatoxigenic     | B   | L-type | <i>A. flavus</i>                         |
| 76 | TX-A-15-1               | Texas          | Aflatoxigenic     | B   | L-type | <i>A. flavus</i>                         |
| 77 | PA-B-23-1               | Pennsylvania   | Aflatoxigenic     | B   | L-type | <i>A. flavus</i>                         |
| 78 | PA-B-23-2               | Pennsylvania   | Non-Aflatoxigenic | C   | L-type | <i>A. flavus</i>                         |
| 79 | PA-B-24-1               | Pennsylvania   | Non-Aflatoxigenic | B   | L-type | <i>A. flavus</i>                         |
| 80 | PA-C-1-1                | Pennsylvania   | Aflatoxigenic     | B   | L-type | <i>A. flavus</i>                         |
| 81 | TX-A-1-1                | Texas          | Aflatoxigenic     | B   | L-type | <i>A. flavus</i>                         |
| 82 | TX-A-2-1                | Texas          | Aflatoxigenic     | A   | L-type | <i>A. flavus</i>                         |
| 83 | TX-A-6-1-S <sup>4</sup> | Texas          | Aflatoxigenic     | n/a | S-type | <i>A. minisclerotigenes</i> <sup>5</sup> |
| 84 | TX-A-13-1               | Texas          | Aflatoxigenic     | B   | L-type | <i>A. flavus</i>                         |
| 85 | TX-A-20-1 <sup>4</sup>  | Texas          | Aflatoxigenic     | B   | L-type | <i>A. flavus</i>                         |
| 86 | TX-B-1-1                | Texas          | Aflatoxigenic     | A   | L-type | <i>A. flavus</i>                         |
| 87 | TX-B-2-1                | Texas          | Aflatoxigenic     | A   | L-type | <i>A. flavus</i>                         |
| 88 | NC-E-3-2                | North Carolina | Aflatoxigenic     | B   | L-type | <i>A. flavus</i>                         |
| 89 | TX-B-7-1                | Texas          | Non-Aflatoxigenic | B   | L-type | <i>A. flavus</i>                         |
| 90 | TX-B-9-1                | Texas          | Non-Aflatoxigenic | B   | L-type | <i>A. flavus</i>                         |
| 91 | TX-B-17-1               | Texas          | Non-Aflatoxigenic | B   | L-type | <i>A. flavus</i>                         |
| 92 | TX-B-20-1               | Texas          | Non-Aflatoxigenic | B   | L-type | <i>A. flavus</i>                         |
| 93 | TX-B-24-1               | Texas          | Aflatoxigenic     | B   | L-type | <i>A. flavus</i>                         |
| 94 | TX-C-17-1               | Texas          | Non-Aflatoxigenic | B   | L-type | <i>A. flavus</i>                         |
| 95 | TX-C-19-1               | Texas          | Aflatoxigenic     | A   | L-type | <i>A. flavus</i>                         |
| 96 | NRRL3357 <sup>3</sup>   | Unknown        | Aflatoxigenic     | A   | L-type | <i>A. flavus</i>                         |

<sup>1</sup> This isolate is also known as NRRL118543

<sup>2</sup> These isolates were obtained from Agricultural Research Service Culture Collection (Peoria, IL) because of their use in previous literature and biocontrol efforts.

<sup>3</sup> The first assembly of this genome (2mAF) results from methodology used for all other isolates while the second (96mAF) represents a high-quality assembly used as the reference genome in this study.

<sup>4</sup> These isolates have been submitted to the Agricultural Research Service Culture Collection (Peoria, IL): 18mAF (NRRL66969), 33mAF (NRRL66970), 60mAF (NRRL66971), 68mAF (NRRL66972), 20mAF (NRRL66973), 85mAF (NRRL66974), 29mAF (NRRL66975), 71mAF (NRRL66976), 24mAF (NRRL66977), 12mAF (NRRL66978), 55mAF (NRRL66979), 83mAF (NRRL66980).

<sup>5</sup> This isolate was previously identified as *Aspergillus texensis*. However, the taxonomy of *A. texensis* has since been resolved and is now thought to fall within the diversity of *Aspergillus minisclerotigenese* (25). Thus, we have updated the species-level identification.

**Table S2.** List of all genes found in biosynthetic gene clusters (BGCs) of the NRRL3357 reference genome.

| Cluster_name   | Contig <sup>1</sup>     | Gene_Name <sup>1</sup>               | Start   | End     | Orientation |
|----------------|-------------------------|--------------------------------------|---------|---------|-------------|
| Aflatoxin      | tig00000023_arrow_pilon | tig00000023_arrow-g5478-AFLA_139150  | 5034533 | 5036133 | +           |
| Aflatoxin      | tig00000023_arrow_pilon | tig00000023_arrow-g5479-AFLA_139160  | 5036416 | 5037288 | +           |
| Aflatoxin      | tig00000023_arrow_pilon | tig00000023_arrow-g5480-AFLA_139170  | 5037389 | 5039366 | -           |
| Aflatoxin      | tig00000023_arrow_pilon | tig00000023_arrow-g5481-AFLA_139180  | 5039913 | 5041561 | +           |
| Aflatoxin      | tig00000023_arrow_pilon | tig00000023_arrow-g5482-AFLA_139190  | 5042103 | 5044089 | -           |
| Aflatoxin      | tig00000023_arrow_pilon | tig00000023_arrow-g5483-AFLA_139200  | 5044604 | 5046554 | -           |
| Aflatoxin      | tig00000023_arrow_pilon | tig00000023_arrow-g5484-AFLA_139210  | 5047801 | 5049287 | +           |
| Aflatoxin      | tig00000023_arrow_pilon | tig00000023_arrow-g5485-AFLA_139220  | 5050332 | 5051901 | +           |
| Aflatoxin      | tig00000023_arrow_pilon | tig00000023_arrow-g5486-AFLA_139230  | 5052075 | 5052923 | +           |
| Aflatoxin      | tig00000023_arrow_pilon | tig00000023_arrow-g5487-AFLA_139240  | 5053106 | 5053647 | +           |
| Aflatoxin      | tig00000023_arrow_pilon | tig00000023_arrow-g5488-AFLA_139250  | 5053941 | 5057456 | +           |
| Aflatoxin      | tig00000023_arrow_pilon | tig00000023_arrow-g5489-AFLA_139270  | 5057685 | 5058074 | -           |
| Aflatoxin      | tig00000023_arrow_pilon | tig00000023_arrow-g5490-AFLA_139280  | 5058511 | 5060214 | -           |
| Aflatoxin      | tig00000023_arrow_pilon | tig00000023_arrow-g5491-AFLA_139290  | 5060460 | 5060965 | +           |
| Aflatoxin      | tig00000023_arrow_pilon | tig00000023_arrow-g5492-AFLA_139310  | 5061073 | 5065877 | -           |
| Aflatoxin      | tig00000023_arrow_pilon | tig00000023_arrow-g5493-AFLA_139330  | 5066146 | 5067120 | -           |
| Aflatoxin      | tig00000023_arrow_pilon | tig00000023_arrow-g5494-AFLA_139340  | 5067688 | 5069139 | -           |
| Aflatoxin      | tig00000023_arrow_pilon | tig00000023_arrow-g5495-AFLA_139360  | 5069878 | 5071212 | +           |
| Aflatoxin      | tig00000023_arrow_pilon | tig00000023_arrow-g5496-AFLA_139370  | 5072482 | 5078328 | -           |
| Aflatoxin      | tig00000023_arrow_pilon | tig00000023_arrow-g5497-AFLA_139380  | 5078704 | 5084162 | +           |
| Aflatoxin      | tig00000023_arrow_pilon | tig00000023_arrow-g5498-AFLA_139390  | 5085473 | 5086462 | -           |
| Aflatoxin      | tig00000023_arrow_pilon | tig00000023_arrow-g5499-AFLA_139400  | 5086969 | 5087510 | -           |
| Aflatoxin      | tig00000023_arrow_pilon | tig00000023_arrow-g5500-AFLA_139410  | 5088152 | 5094775 | +           |
| Aflatoxin      | tig00000023_arrow_pilon | tig00000023_arrow-g5501-AFLA_139420  | 5096434 | 5101070 | -           |
| Aflatrem(ATM1) | tig00000037_arrow_pilon | tig00000037_arrow-g8357-AFLA_096390  | 4432590 | 4435625 | -           |
| Aflatrem(ATM1) | tig00000037_arrow_pilon | tig00000037_arrow-g8358-AFLA_096400  | 4437895 | 4439539 | +           |
| Aflatrem(ATM2) | tig00101499_arrow_pilon | tig00101499_arrow-g10249-AFLA_045500 | 1958271 | 1961891 | -           |
| Aflatrem(ATM2) | tig00101499_arrow_pilon | tig00101499_arrow-g10250-AFLA_045540 | 1962254 | 1965738 | +           |
| Aflavarin      | tig00000023_arrow_pilon | tig00000023_arrow-g4308-AFLA_108540  | 1176675 | 1177916 | -           |
| Aflavarin      | tig00000023_arrow_pilon | tig00000023_arrow-g4309-AFLA_108550  | 1179276 | 1184721 | -           |
| Aflavarin      | tig00000023_arrow_pilon | tig00000023_arrow-g4310-AFLA_108560  | 1186272 | 1187739 | +           |
| Aflavarin      | tig00000023_arrow_pilon | tig00000023_arrow-g4311-AFLA_108580  | 1188323 | 1191951 | -           |
| AsparasoneA    | tig00101497_arrow_pilon | tig00101497_arrow-g843-AFLA_082150   | 2674263 | 2680807 | +           |
| AsparasoneA    | tig00101497_arrow_pilon | tig00101497_arrow-g844-AFLA_082160   | 2681343 | 2683344 | -           |
| AsparasoneA    | tig00101497_arrow_pilon | tig00101497_arrow-g845-AFLA_082170   | 2684803 | 2686393 | -           |
| Aspergillicins | tig00000095_arrow_pilon | tig00000095_arrow-g11276-AFLA_010680 | 2324920 | 2326179 | +           |
| Aspergillicins | tig00000095_arrow_pilon | tig00000095_arrow-g11277-AFLA_010670 | 2326987 | 2327637 | -           |
| Aspergillicins | tig00000095_arrow_pilon | tig00000095_arrow-g11278-AFLA_010660 | 2330131 | 2331160 | +           |
| Aspergillicins | tig00000095_arrow_pilon | tig00000095_arrow-g11279-AFLA_010650 | 2331784 | 2332863 | -           |
| Aspergillicins | tig00000095_arrow_pilon | tig00000095_arrow-g11280-AFLA_010640 | 2337150 | 2339093 | -           |
| Aspergillicins | tig00000095_arrow_pilon | tig00000095_arrow-g11281-AFLA_010630 | 2340101 | 2344084 | +           |
| Aspergillicins | tig00000095_arrow_pilon | tig00000095_arrow-g11282-AFLA_010620 | 2344911 | 2353519 | -           |
| Aspergillicins | tig00000095_arrow_pilon | tig00000095_arrow-g11283-AFLA_010600 | 2353887 | 2355311 | +           |
| Aspergillicins | tig00000095_arrow_pilon | tig00000095_arrow-g11284             | 2358156 | 2359277 | +           |
| Aspergillicins | tig00000095_arrow_pilon | tig00000095_arrow-g11285-AFLA_010580 | 2361596 | 2384969 | -           |
| Aspergillicins | tig00000095_arrow_pilon | tig00000095_arrow-g11286-AFLA_010550 | 2388021 | 2389553 | +           |
| Aspergillicins | tig00000095_arrow_pilon | tig00000095_arrow-g11287-AFLA_010540 | 2390900 | 2392243 | -           |
| Aspergillicins | tig00000095_arrow_pilon | tig00000095_arrow-g11288-AFLA_010520 | 2394069 | 2395082 | +           |
| Aspergillicins | tig00000095_arrow_pilon | tig00000095_arrow-g11289-AFLA_010510 | 2395158 | 2395890 | +           |
| Aspergillicins | tig00000095_arrow_pilon | tig00000095_arrow-g11290-AFLA_010500 | 2397071 | 2398844 | -           |
| Aspergillicins | tig00000095_arrow_pilon | tig00000095_arrow-g11291-AFLA_010480 | 2400334 | 2401866 | +           |
| Aspergillicins | tig00000095_arrow_pilon | tig00000095_arrow-g11292-AFLA_010470 | 2402155 | 2402862 | -           |

|              |                         |                                      |         |         |   |
|--------------|-------------------------|--------------------------------------|---------|---------|---|
| Aspergillins | tig00000095_arrow_pilon | tig00000095_arrow-g11293-AFLA_010460 | 2403580 | 2406068 | + |
| BGC_10       | tig00000029_arrow_pilon | tig00000029_arrow-g6549-AFLA_005430  | 3348055 | 3351550 | - |
| BGC_10       | tig00000029_arrow_pilon | tig00000029_arrow-g6550-AFLA_005410  | 3351833 | 3356736 | + |
| BGC_10       | tig00000029_arrow_pilon | tig00000029_arrow-g6551-AFLA_005390  | 3358998 | 3360400 | + |
| BGC_10       | tig00000029_arrow_pilon | tig00000029_arrow-g6552              | 3360602 | 3362277 | - |
| BGC_10       | tig00000029_arrow_pilon | tig00000029_arrow-g6553-AFLA_005370  | 3364000 | 3364824 | + |
| BGC_10       | tig00000029_arrow_pilon | tig00000029_arrow-g6554-AFLA_005360  | 3364910 | 3366622 | - |
| BGC_10       | tig00000029_arrow_pilon | tig00000029_arrow-g6555-AFLA_005350  | 3368704 | 3369881 | - |
| BGC_10       | tig00000029_arrow_pilon | tig00000029_arrow-g6556-AFLA_005340  | 3371120 | 3372155 | + |
| BGC_10       | tig00000029_arrow_pilon | tig00000029_arrow-g6557-AFLA_005330  | 3373452 | 3374334 | - |
| BGC_10       | tig00000029_arrow_pilon | tig00000029_arrow-g6558-AFLA_005320  | 3374907 | 3383103 | + |
| BGC_10       | tig00000029_arrow_pilon | tig00000029_arrow-g6559-AFLA_005300  | 3384175 | 3391393 | + |
| BGC_10       | tig00000029_arrow_pilon | tig00000029_arrow-g6560-AFLA_005290  | 3392170 | 3393865 | - |
| BGC_10       | tig00000029_arrow_pilon | tig00000029_arrow-g6561-AFLA_005280  | 3394864 | 3396481 | + |
| BGC_10       | tig00000029_arrow_pilon | tig00000029_arrow-g6562-AFLA_005270  | 3397380 | 3399895 | + |
| BGC_14       | tig00101499_arrow_pilon | tig00101499_arrow-g9975-AFLA_042280  | 1101852 | 1103407 | - |
| BGC_14       | tig00101499_arrow_pilon | tig00101499_arrow-g9976-AFLA_042300  | 1104587 | 1106479 | - |
| BGC_14       | tig00101499_arrow_pilon | tig00101499_arrow-g9977-AFLA_042310  | 1109328 | 1111526 | - |
| BGC_14       | tig00101499_arrow_pilon | tig00101499_arrow-g9978-AFLA_042320  | 1112912 | 1114458 | + |
| BGC_14       | tig00101499_arrow_pilon | tig00101499_arrow-g9979-AFLA_042330  | 1114462 | 1115252 | - |
| BGC_14       | tig00101499_arrow_pilon | tig00101499_arrow-g9980-AFLA_042340  | 1116617 | 1118006 | - |
| BGC_14       | tig00101499_arrow_pilon | tig00101499_arrow-g9981-AFLA_042350  | 1118561 | 1122417 | + |
| BGC_14       | tig00101499_arrow_pilon | tig00101499_arrow-g9982-AFLA_042380  | 1122434 | 1126332 | - |
| BGC_14       | tig00101499_arrow_pilon | tig00101499_arrow-g9983-AFLA_042390  | 1131403 | 1132523 | - |
| BGC_14       | tig00101499_arrow_pilon | tig00101499_arrow-g9984-AFLA_042400  | 1133329 | 1136890 | - |
| BGC_14       | tig00101499_arrow_pilon | tig00101499_arrow-g9985-AFLA_042410  | 1137381 | 1138112 | - |
| BGC_14       | tig00101499_arrow_pilon | tig00101499_arrow-g9986-AFLA_042440  | 1138867 | 1143570 | + |
| BGC_14       | tig00101499_arrow_pilon | tig00101499_arrow-g9987-AFLA_042460  | 1143707 | 1144933 | - |
| BGC_14       | tig00101499_arrow_pilon | tig00101499_arrow-g9988-AFLA_042470  | 1145026 | 1146685 | + |
| BGC_14       | tig00101499_arrow_pilon | tig00101499_arrow-g9989-AFLA_042480  | 1147029 | 1148112 | + |
| BGC_14       | tig00101499_arrow_pilon | tig00101499_arrow-g9990-AFLA_042490  | 1148708 | 1150450 | - |
| BGC_14       | tig00101499_arrow_pilon | tig00101499_arrow-g9991-AFLA_042500  | 1151134 | 1152192 | + |
| BGC_14       | tig00101499_arrow_pilon | tig00101499_arrow-g9992-AFLA_042510  | 1153786 | 1155375 | + |
| BGC_14       | tig00101499_arrow_pilon | tig00101499_arrow-g9993-AFLA_042520  | 1155847 | 1156302 | - |
| BGC_14       | tig00101499_arrow_pilon | tig00101499_arrow-g9994-AFLA_042530  | 1156798 | 1158114 | + |
| BGC_15       | tig00000001_arrow_pilon | tig00000001_arrow-g2305-AFLA_126640  | 924103  | 925511  | + |
| BGC_15       | tig00000001_arrow_pilon | tig00000001_arrow-g2306-AFLA_126650  | 925828  | 927540  | - |
| BGC_15       | tig00000001_arrow_pilon | tig00000001_arrow-g2307              | 930122  | 930550  | + |
| BGC_15       | tig00000001_arrow_pilon | tig00000001_arrow-g2308-AFLA_126660  | 931475  | 933268  | + |
| BGC_15       | tig00000001_arrow_pilon | tig00000001_arrow-g2309-AFLA_126680  | 933961  | 935592  | - |
| BGC_15       | tig00000001_arrow_pilon | tig00000001_arrow-g2310-AFLA_126690  | 936995  | 937876  | - |
| BGC_15       | tig00000001_arrow_pilon | tig00000001_arrow-g2311              | 943784  | 944246  | + |
| BGC_15       | tig00000001_arrow_pilon | tig00000001_arrow-g2312-AFLA_126710  | 945204  | 953542  | - |
| BGC_15       | tig00000001_arrow_pilon | tig00000001_arrow-g2313              | 954818  | 955657  | + |
| BGC_15       | tig00000001_arrow_pilon | tig00000001_arrow-g2314-AFLA_126730  | 956086  | 956681  | - |
| BGC_15       | tig00000001_arrow_pilon | tig00000001_arrow-g2315              | 957455  | 959094  | + |
| BGC_15       | tig00000001_arrow_pilon | tig00000001_arrow-g2316-AFLA_126740  | 961231  | 965084  | - |
| BGC_15       | tig00000001_arrow_pilon | tig00000001_arrow-g2317-AFLA_126750  | 966179  | 966892  | + |
| BGC_15       | tig00000001_arrow_pilon | tig00000001_arrow-g2318-AFLA_126760  | 968785  | 969966  | + |
| BGC_15       | tig00000001_arrow_pilon | tig00000001_arrow-g2319-AFLA_126770  | 971709  | 972907  | + |
| BGC_20       | tig00101499_arrow_pilon | tig00101499_arrow-g9909-AFLA_041530  | 886279  | 889691  | + |
| BGC_20       | tig00101499_arrow_pilon | tig00101499_arrow-g9910-AFLA_041540  | 893503  | 896162  | + |
| BGC_20       | tig00101499_arrow_pilon | tig00101499_arrow-g9911-AFLA_041550  | 896687  | 898157  | + |
| BGC_20       | tig00101499_arrow_pilon | tig00101499_arrow-g9912-AFLA_041560  | 898787  | 899783  | + |
| BGC_20       | tig00101499_arrow_pilon | tig00101499_arrow-g9913-AFLA_041570  | 900224  | 901507  | - |
| BGC_20       | tig00101499_arrow_pilon | tig00101499_arrow-g9914-AFLA_041590  | 902533  | 905464  | + |

|        |                         |                                     |         |         |   |
|--------|-------------------------|-------------------------------------|---------|---------|---|
| BGC_20 | tig00101499_arrow_pilon | tig00101499_arrow-g9915-AFLA_041600 | 906141  | 908288  | + |
| BGC_20 | tig00101499_arrow_pilon | tig00101499_arrow-g9916-AFLA_041610 | 908783  | 912163  | - |
| BGC_20 | tig00101499_arrow_pilon | tig00101499_arrow-g9917-AFLA_041620 | 913704  | 914886  | - |
| BGC_20 | tig00101499_arrow_pilon | tig00101499_arrow-g9918-AFLA_041630 | 916701  | 917333  | - |
| BGC_20 | tig00101499_arrow_pilon | tig00101499_arrow-g9919-AFLA_041640 | 921525  | 923141  | + |
| BGC_20 | tig00101499_arrow_pilon | tig00101499_arrow-g9920-AFLA_041650 | 924666  | 926573  | + |
| BGC_20 | tig00101499_arrow_pilon | tig00101499_arrow-g9921-AFLA_041660 | 927349  | 929415  | + |
| BGC_20 | tig00101499_arrow_pilon | tig00101499_arrow-g9922-AFLA_041670 | 930391  | 931395  | + |
| BGC_21 | tig00000050_arrow_pilon | tig00000050_arrow-g9155-AFLA_102560 | 2607178 | 2609300 | + |
| BGC_21 | tig00000050_arrow_pilon | tig00000050_arrow-g9156-AFLA_102550 | 2609483 | 2612036 | - |
| BGC_21 | tig00000050_arrow_pilon | tig00000050_arrow-g9157             | 2612617 | 2613869 | + |
| BGC_21 | tig00000050_arrow_pilon | tig00000050_arrow-g9158-AFLA_102520 | 2614411 | 2616195 | + |
| BGC_21 | tig00000050_arrow_pilon | tig00000050_arrow-g9159-AFLA_102510 | 2616319 | 2618340 | - |
| BGC_21 | tig00000050_arrow_pilon | tig00000050_arrow-g9160-AFLA_102500 | 2618820 | 2620713 | + |
| BGC_21 | tig00000050_arrow_pilon | tig00000050_arrow-g9161-AFLA_102490 | 2621286 | 2622660 | - |
| BGC_21 | tig00000050_arrow_pilon | tig00000050_arrow-g9162-AFLA_102480 | 2624070 | 2626074 | + |
| BGC_21 | tig00000050_arrow_pilon | tig00000050_arrow-g9163-AFLA_102460 | 2626319 | 2628935 | - |
| BGC_23 | tig00000050_arrow_pilon | tig00000050_arrow-g8414-AFLA_064440 | 100245  | 103039  | - |
| BGC_23 | tig00000050_arrow_pilon | tig00000050_arrow-g8415-AFLA_064460 | 103278  | 106216  | + |
| BGC_23 | tig00000050_arrow_pilon | tig00000050_arrow-g8416-AFLA_064470 | 106411  | 109504  | - |
| BGC_23 | tig00000050_arrow_pilon | tig00000050_arrow-g8417-AFLA_064490 | 109780  | 110850  | + |
| BGC_23 | tig00000050_arrow_pilon | tig00000050_arrow-g8418-AFLA_064500 | 111277  | 112274  | - |
| BGC_23 | tig00000050_arrow_pilon | tig00000050_arrow-g8419-AFLA_064510 | 113238  | 114295  | - |
| BGC_23 | tig00000050_arrow_pilon | tig00000050_arrow-g8420-AFLA_064520 | 114559  | 115915  | + |
| BGC_23 | tig00000050_arrow_pilon | tig00000050_arrow-g8421-AFLA_064530 | 116056  | 116963  | + |
| BGC_23 | tig00000050_arrow_pilon | tig00000050_arrow-g8422-AFLA_064540 | 117094  | 118717  | - |
| BGC_23 | tig00000050_arrow_pilon | tig00000050_arrow-g8423-AFLA_064550 | 118973  | 120343  | + |
| BGC_23 | tig00000050_arrow_pilon | tig00000050_arrow-g8424-AFLA_064560 | 120646  | 125428  | - |
| BGC_23 | tig00000050_arrow_pilon | tig00000050_arrow-g8425-AFLA_064570 | 126376  | 128235  | - |
| BGC_23 | tig00000050_arrow_pilon | tig00000050_arrow-g8426-AFLA_064580 | 128483  | 129701  | + |
| BGC_23 | tig00000050_arrow_pilon | tig00000050_arrow-g8427-AFLA_064590 | 129964  | 131320  | - |
| BGC_23 | tig00000050_arrow_pilon | tig00000050_arrow-g8428-AFLA_064600 | 131555  | 132996  | + |
| BGC_23 | tig00000050_arrow_pilon | tig00000050_arrow-g8429-AFLA_064610 | 133794  | 134767  | - |
| BGC_23 | tig00000050_arrow_pilon | tig00000050_arrow-g8430             | 136536  | 137459  | + |
| BGC_23 | tig00000050_arrow_pilon | tig00000050_arrow-g8431-AFLA_064630 | 139323  | 144054  | + |
| BGC_23 | tig00000050_arrow_pilon | tig00000050_arrow-g8432-AFLA_064660 | 145229  | 150592  | - |
| BGC_24 | tig00000050_arrow_pilon | tig00000050_arrow-g8589-AFLA_066530 | 634695  | 635881  | - |
| BGC_24 | tig00000050_arrow_pilon | tig00000050_arrow-g8590-AFLA_066550 | 637188  | 638412  | - |
| BGC_24 | tig00000050_arrow_pilon | tig00000050_arrow-g8591-AFLA_066570 | 642525  | 643881  | + |
| BGC_24 | tig00000050_arrow_pilon | tig00000050_arrow-g8592-AFLA_066580 | 644888  | 645840  | - |
| BGC_24 | tig00000050_arrow_pilon | tig00000050_arrow-g8593-AFLA_066590 | 646168  | 647458  | - |
| BGC_24 | tig00000050_arrow_pilon | tig00000050_arrow-g8594-AFLA_066600 | 648751  | 649428  | + |
| BGC_24 | tig00000050_arrow_pilon | tig00000050_arrow-g8595             | 651260  | 651889  | + |
| BGC_24 | tig00000050_arrow_pilon | tig00000050_arrow-g8596-AFLA_066630 | 653218  | 657438  | + |
| BGC_24 | tig00000050_arrow_pilon | tig00000050_arrow-g8597-AFLA_066640 | 658072  | 658879  | + |
| BGC_24 | tig00000050_arrow_pilon | tig00000050_arrow-g8598-AFLA_066650 | 659186  | 660538  | - |
| BGC_24 | tig00000050_arrow_pilon | tig00000050_arrow-g8599-AFLA_066660 | 661969  | 663712  | + |
| BGC_24 | tig00000050_arrow_pilon | tig00000050_arrow-g8600-AFLA_066670 | 664751  | 665846  | + |
| BGC_24 | tig00000050_arrow_pilon | tig00000050_arrow-g8601-AFLA_066680 | 666659  | 670012  | + |
| BGC_24 | tig00000050_arrow_pilon | tig00000050_arrow-g8602-AFLA_066690 | 670436  | 671414  | - |
| BGC_24 | tig00000050_arrow_pilon | tig00000050_arrow-g8603-AFLA_066700 | 672177  | 673673  | - |
| BGC_24 | tig00000050_arrow_pilon | tig00000050_arrow-g8604-AFLA_066710 | 674022  | 675152  | - |
| BGC_24 | tig00000050_arrow_pilon | tig00000050_arrow-g8605-AFLA_066720 | 675503  | 691845  | + |
| BGC_24 | tig00000050_arrow_pilon | tig00000050_arrow-g8606-AFLA_066730 | 693360  | 695280  | + |
| BGC_24 | tig00000050_arrow_pilon | tig00000050_arrow-g8607-AFLA_066760 | 696186  | 705175  | + |
| BGC_24 | tig00000050_arrow_pilon | tig00000050_arrow-g8608-AFLA_066770 | 706577  | 708117  | - |

|        |                         |                                     |         |         |   |
|--------|-------------------------|-------------------------------------|---------|---------|---|
| BGC_24 | tig00000050_arrow_pilon | tig00000050_arrow-g8609-AFLA_066780 | 708728  | 713494  | + |
| BGC_24 | tig00000050_arrow_pilon | tig00000050_arrow-g8610             | 714510  | 715939  | - |
| BGC_24 | tig00000050_arrow_pilon | tig00000050_arrow-g8611-AFLA_066810 | 716369  | 717991  | + |
| BGC_24 | tig00000050_arrow_pilon | tig00000050_arrow-g8612-AFLA_066820 | 718476  | 721432  | + |
| BGC_24 | tig00000050_arrow_pilon | tig00000050_arrow-g8613-AFLA_066830 | 721653  | 724015  | - |
| BGC_35 | tig00101497_arrow_pilon | tig00101497_arrow-g1324-AFLA_087790 | 4215204 | 4218198 | - |
| BGC_35 | tig00101497_arrow_pilon | tig00101497_arrow-g1325-AFLA_087810 | 4223023 | 4224586 | + |
| BGC_35 | tig00101497_arrow_pilon | tig00101497_arrow-g1326-AFLA_087820 | 4227039 | 4228323 | - |
| BGC_35 | tig00101497_arrow_pilon | tig00101497_arrow-g1327-AFLA_087830 | 4229436 | 4232843 | - |
| BGC_35 | tig00101497_arrow_pilon | tig00101497_arrow-g1328-AFLA_087840 | 4233279 | 4236872 | + |
| BGC_35 | tig00101497_arrow_pilon | tig00101497_arrow-g1329-AFLA_087850 | 4237067 | 4240481 | + |
| BGC_35 | tig00101497_arrow_pilon | tig00101497_arrow-g1330-AFLA_087870 | 4241415 | 4242788 | + |
| BGC_35 | tig00101497_arrow_pilon | tig00101497_arrow-g1331-AFLA_087880 | 4244296 | 4245325 | + |
| BGC_35 | tig00101497_arrow_pilon | tig00101497_arrow-g1332-AFLA_087890 | 4246093 | 4249822 | - |
| BGC_35 | tig00101497_arrow_pilon | tig00101497_arrow-g1333             | 4250537 | 4258151 | + |
| BGC_35 | tig00101497_arrow_pilon | tig00101497_arrow-g1334-AFLA_087900 | 4259606 | 4261672 | - |
| BGC_36 | tig00000001_arrow_pilon | tig00000001_arrow-g2336-AFLA_126970 | 1030423 | 1032240 | + |
| BGC_36 | tig00000001_arrow_pilon | tig00000001_arrow-g2337-AFLA_127000 | 1033523 | 1038074 | + |
| BGC_36 | tig00000001_arrow_pilon | tig00000001_arrow-g2338-AFLA_127010 | 1038636 | 1039094 | + |
| BGC_36 | tig00000001_arrow_pilon | tig00000001_arrow-g2339-AFLA_127020 | 1039323 | 1040802 | - |
| BGC_36 | tig00000001_arrow_pilon | tig00000001_arrow-g2340-AFLA_127030 | 1041428 | 1042231 | - |
| BGC_36 | tig00000001_arrow_pilon | tig00000001_arrow-g2341-AFLA_127040 | 1043109 | 1044410 | + |
| BGC_36 | tig00000001_arrow_pilon | tig00000001_arrow-g2342-AFLA_127050 | 1044729 | 1045058 | - |
| BGC_36 | tig00000001_arrow_pilon | tig00000001_arrow-g2343-AFLA_127060 | 1045772 | 1046878 | + |
| BGC_36 | tig00000001_arrow_pilon | tig00000001_arrow-g2344-AFLA_127070 | 1047328 | 1048235 | - |
| BGC_36 | tig00000001_arrow_pilon | tig00000001_arrow-g2345-AFLA_127080 | 1048501 | 1049517 | + |
| BGC_36 | tig00000001_arrow_pilon | tig00000001_arrow-g2346-AFLA_127090 | 1050220 | 1058091 | + |
| BGC_36 | tig00000001_arrow_pilon | tig00000001_arrow-g2347-AFLA_127100 | 1058748 | 1059673 | + |
| BGC_36 | tig00000001_arrow_pilon | tig00000001_arrow-g2348-AFLA_127110 | 1060043 | 1061551 | - |
| BGC_36 | tig00000001_arrow_pilon | tig00000001_arrow-g2349-AFLA_127130 | 1063214 | 1064725 | - |
| BGC_36 | tig00000001_arrow_pilon | tig00000001_arrow-g2350-AFLA_127140 | 1066418 | 1067491 | + |
| BGC_36 | tig00000001_arrow_pilon | tig00000001_arrow-g2351-AFLA_127160 | 1067731 | 1070963 | - |
| BGC_36 | tig00000001_arrow_pilon | tig00000001_arrow-g2352-AFLA_127170 | 1074217 | 1075791 | + |
| BGC_36 | tig00000001_arrow_pilon | tig00000001_arrow-g2353             | 1075874 | 1079541 | - |
| BGC_37 | tig00000029_arrow_pilon | tig00000029_arrow-g6792-AFLA_002690 | 4208231 | 4209778 | + |
| BGC_37 | tig00000029_arrow_pilon | tig00000029_arrow-g6793-AFLA_002680 | 4210559 | 4213242 | - |
| BGC_37 | tig00000029_arrow_pilon | tig00000029_arrow-g6794-AFLA_002670 | 4215969 | 4217699 | - |
| BGC_37 | tig00000029_arrow_pilon | tig00000029_arrow-g6795-AFLA_002640 | 4218716 | 4223327 | - |
| BGC_37 | tig00000029_arrow_pilon | tig00000029_arrow-g6796             | 4226776 | 4227797 | + |
| BGC_37 | tig00000029_arrow_pilon | tig00000029_arrow-g6797-AFLA_002620 | 4228840 | 4229811 | + |
| BGC_37 | tig00000029_arrow_pilon | tig00000029_arrow-g6798-AFLA_002610 | 4231158 | 4233682 | + |
| BGC_38 | tig00000037_arrow_pilon | tig00000037_arrow-g7865-AFLA_090590 | 2869876 | 2872521 | + |
| BGC_38 | tig00000037_arrow_pilon | tig00000037_arrow-g7866-AFLA_090600 | 2876126 | 2877802 | - |
| BGC_38 | tig00000037_arrow_pilon | tig00000037_arrow-g7867-AFLA_090620 | 2878687 | 2879426 | + |
| BGC_38 | tig00000037_arrow_pilon | tig00000037_arrow-g7868-AFLA_090640 | 2880152 | 2884423 | - |
| BGC_38 | tig00000037_arrow_pilon | tig00000037_arrow-g7869-AFLA_090660 | 2886231 | 2887209 | - |
| BGC_38 | tig00000037_arrow_pilon | tig00000037_arrow-g7870-AFLA_090680 | 2889849 | 2891889 | + |
| BGC_38 | tig00000037_arrow_pilon | tig00000037_arrow-g7871-AFLA_090690 | 2892870 | 2895343 | - |
| BGC_39 | tig00101497_arrow_pilon | tig00101497_arrow-g1869             | 6118650 | 6119686 | - |
| BGC_39 | tig00101497_arrow_pilon | tig00101497_arrow-g1870-AFLA_053160 | 6120725 | 6123070 | - |
| BGC_39 | tig00101497_arrow_pilon | tig00101497_arrow-g1871-AFLA_053170 | 6123846 | 6124900 | + |
| BGC_39 | tig00101497_arrow_pilon | tig00101497_arrow-g1872-AFLA_053180 | 6125224 | 6126480 | - |
| BGC_39 | tig00101497_arrow_pilon | tig00101497_arrow-g1873-AFLA_053190 | 6127877 | 6128308 | + |
| BGC_39 | tig00101497_arrow_pilon | tig00101497_arrow-g1874-AFLA_053200 | 6128927 | 6130105 | - |
| BGC_39 | tig00101497_arrow_pilon | tig00101497_arrow-g1875-AFLA_053220 | 6130746 | 6134519 | + |
| BGC_39 | tig00101497_arrow_pilon | tig00101497_arrow-g1876-AFLA_053230 | 6135205 | 6136932 | - |



|        |                         |                                      |         |         |   |
|--------|-------------------------|--------------------------------------|---------|---------|---|
| BGC_39 | tig00101497_arrow_pilon | tig00101497_arrow-g1877-AFLA_053240  | 6137290 | 6138615 | + |
| BGC_39 | tig00101497_arrow_pilon | tig00101497_arrow-g1878              | 6139468 | 6147748 | + |
| BGC_39 | tig00101497_arrow_pilon | tig00101497_arrow-g1879-AFLA_053250  | 6149628 | 6150138 | + |
| BGC_39 | tig00101497_arrow_pilon | tig00101497_arrow-g1880-AFLA_053260  | 6151996 | 6153249 | - |
| BGC_39 | tig00101497_arrow_pilon | tig00101497_arrow-g1881-AFLA_053270  | 6155623 | 6161235 | - |
| BGC_39 | tig00101497_arrow_pilon | tig00101497_arrow-g1882-AFLA_053280  | 6162104 | 6163027 | + |
| BGC_39 | tig00101497_arrow_pilon | tig00101497_arrow-g1883-AFLA_053290  | 6163414 | 6166896 | + |
| BGC_40 | tig00000023_arrow_pilon | tig00000023_arrow-g4016              | 264793  | 266047  | + |
| BGC_40 | tig00000023_arrow_pilon | tig00000023_arrow-g4017-AFLA_105090  | 266070  | 268051  | - |
| BGC_40 | tig00000023_arrow_pilon | tig00000023_arrow-g4018-AFLA_105100  | 268746  | 270521  | + |
| BGC_40 | tig00000023_arrow_pilon | tig00000023_arrow-g4019-AFLA_105120  | 271583  | 272134  | + |
| BGC_40 | tig00000023_arrow_pilon | tig00000023_arrow-g4020-AFLA_105130  | 272849  | 273621  | + |
| BGC_40 | tig00000023_arrow_pilon | tig00000023_arrow-g4021-AFLA_105150  | 274499  | 277529  | + |
| BGC_40 | tig00000023_arrow_pilon | tig00000023_arrow-g4022-AFLA_105170  | 279526  | 280987  | - |
| BGC_40 | tig00000023_arrow_pilon | tig00000023_arrow-g4023-AFLA_105190  | 284426  | 287752  | + |
| BGC_40 | tig00000023_arrow_pilon | tig00000023_arrow-g4024-AFLA_105200  | 288350  | 290353  | - |
| BGC_40 | tig00000023_arrow_pilon | tig00000023_arrow-g4025-AFLA_105210  | 293019  | 294070  | - |
| BGC_40 | tig00000023_arrow_pilon | tig00000023_arrow-g4026-AFLA_105220  | 294232  | 295017  | - |
| BGC_40 | tig00000023_arrow_pilon | tig00000023_arrow-g4027-AFLA_105230  | 295464  | 297177  | - |
| BGC_40 | tig00000023_arrow_pilon | tig00000023_arrow-g4028-AFLA_105240  | 299308  | 299747  | + |
| BGC_40 | tig00000023_arrow_pilon | tig00000023_arrow-g4029-AFLA_105250  | 300141  | 302810  | - |
| BGC_40 | tig00000023_arrow_pilon | tig00000023_arrow-g4030-AFLA_105270  | 303698  | 304195  | - |
| BGC_40 | tig00000023_arrow_pilon | tig00000023_arrow-g4031-AFLA_105280  | 305887  | 307338  | + |
| BGC_40 | tig00000023_arrow_pilon | tig00000023_arrow-g4032-AFLA_105290  | 307707  | 308748  | - |
| BGC_41 | tig00000023_arrow_pilon | tig00000023_arrow-g4184-AFLA_107090  | 790374  | 794546  | - |
| BGC_41 | tig00000023_arrow_pilon | tig00000023_arrow-g4185-AFLA_107120  | 795131  | 798884  | + |
| BGC_41 | tig00000023_arrow_pilon | tig00000023_arrow-g4186-AFLA_107130  | 799410  | 800438  | + |
| BGC_41 | tig00000023_arrow_pilon | tig00000023_arrow-g4187-AFLA_107140  | 801373  | 801927  | + |
| BGC_41 | tig00000023_arrow_pilon | tig00000023_arrow-g4188-AFLA_107150  | 802101  | 803138  | - |
| BGC_42 | tig00000095_arrow_pilon | tig00000095_arrow-g11393-AFLA_009250 | 2722185 | 2725445 | + |
| BGC_42 | tig00000095_arrow_pilon | tig00000095_arrow-g11394             | 2727191 | 2727467 | - |
| BGC_42 | tig00000095_arrow_pilon | tig00000095_arrow-g11395-AFLA_009240 | 2728223 | 2729675 | + |
| BGC_42 | tig00000095_arrow_pilon | tig00000095_arrow-g11396-AFLA_009170 | 2733911 | 2743311 | + |
| BGC_42 | tig00000095_arrow_pilon | tig00000095_arrow-g11397-AFLA_009160 | 2743508 | 2744840 | - |
| BGC_42 | tig00000095_arrow_pilon | tig00000095_arrow-g11398-AFLA_009120 | 2745244 | 2751036 | + |
| BGC_42 | tig00000095_arrow_pilon | tig00000095_arrow-g11399-AFLA_009110 | 2752560 | 2754024 | - |
| BGC_42 | tig00000095_arrow_pilon | tig00000095_arrow-g11400-AFLA_009100 | 2756724 | 2760866 | + |
| BGC_42 | tig00000095_arrow_pilon | tig00000095_arrow-g11401-AFLA_009090 | 2761884 | 2767720 | - |
| BGC_43 | tig00000023_arrow_pilon | tig00000023_arrow-g5159-AFLA_135380  | 4026112 | 4028889 | - |
| BGC_43 | tig00000023_arrow_pilon | tig00000023_arrow-g5160-AFLA_135390  | 4031071 | 4031691 | + |
| BGC_43 | tig00000023_arrow_pilon | tig00000023_arrow-g5161-AFLA_135400  | 4032495 | 4034139 | - |
| BGC_43 | tig00000023_arrow_pilon | tig00000023_arrow-g5162-AFLA_135410  | 4037432 | 4039981 | - |
| BGC_43 | tig00000023_arrow_pilon | tig00000023_arrow-g5163-AFLA_135420  | 4040875 | 4041976 | + |
| BGC_43 | tig00000023_arrow_pilon | tig00000023_arrow-g5164-AFLA_135440  | 4042284 | 4046728 | - |
| BGC_43 | tig00000023_arrow_pilon | tig00000023_arrow-g5165-AFLA_135450  | 4047333 | 4048505 | + |
| BGC_43 | tig00000023_arrow_pilon | tig00000023_arrow-g5166-AFLA_135460  | 4049815 | 4053386 | - |
| BGC_43 | tig00000023_arrow_pilon | tig00000023_arrow-g5167-AFLA_135480  | 4054307 | 4054843 | + |
| BGC_43 | tig00000023_arrow_pilon | tig00000023_arrow-g5168-AFLA_135490  | 4055768 | 4058983 | + |
| BGC_43 | tig00000023_arrow_pilon | tig00000023_arrow-g5169-AFLA_135500  | 4060291 | 4061729 | + |
| BGC_43 | tig00000023_arrow_pilon | tig00000023_arrow-g5170-AFLA_135510  | 4062096 | 4063681 | - |
| BGC_43 | tig00000023_arrow_pilon | tig00000023_arrow-g5171-AFLA_135520  | 4064381 | 4065444 | + |
| BGC_43 | tig00000023_arrow_pilon | tig00000023_arrow-g5172-AFLA_135530  | 4067474 | 4071062 | + |
| BGC_43 | tig00000023_arrow_pilon | tig00000023_arrow-g5173-AFLA_135540  | 4072221 | 4073241 | - |
| BGC_43 | tig00000023_arrow_pilon | tig00000023_arrow-g5174-AFLA_135560  | 4073655 | 4078119 | - |
| BGC_43 | tig00000023_arrow_pilon | tig00000023_arrow-g5175-AFLA_135570  | 4078966 | 4079820 | - |
| BGC_44 | tig00000050_arrow_pilon | tig00000050_arrow-g9331-AFLA_100450  | 3119513 | 3127715 | - |

|        |                         |                                     |         |         |   |
|--------|-------------------------|-------------------------------------|---------|---------|---|
| BGC_44 | tig00000050_arrow_pilon | tig00000050_arrow-g9332-AFLA_100430 | 3128283 | 3129746 | + |
| BGC_44 | tig00000050_arrow_pilon | tig00000050_arrow-g9333-AFLA_100420 | 3129794 | 3131525 | - |
| BGC_44 | tig00000050_arrow_pilon | tig00000050_arrow-g9334-AFLA_100400 | 3131803 | 3133877 | + |
| BGC_44 | tig00000050_arrow_pilon | tig00000050_arrow-g9335-AFLA_100390 | 3133898 | 3135235 | - |
| BGC_44 | tig00000050_arrow_pilon | tig00000050_arrow-g9336-AFLA_100380 | 3135535 | 3136007 | + |
| BGC_44 | tig00000050_arrow_pilon | tig00000050_arrow-g9337-AFLA_100370 | 3136219 | 3137541 | + |
| BGC_44 | tig00000050_arrow_pilon | tig00000050_arrow-g9338-AFLA_100360 | 3137830 | 3139638 | + |
| BGC_44 | tig00000050_arrow_pilon | tig00000050_arrow-g9339-AFLA_100350 | 3139884 | 3141446 | + |
| BGC_44 | tig00000050_arrow_pilon | tig00000050_arrow-g9340             | 3143096 | 3154906 | - |
| BGC_44 | tig00000050_arrow_pilon | tig00000050_arrow-g9341-AFLA_100330 | 3158777 | 3160198 | + |
| BGC_44 | tig00000050_arrow_pilon | tig00000050_arrow-g9342-AFLA_100310 | 3161691 | 3162596 | - |
| BGC_44 | tig00000050_arrow_pilon | tig00000050_arrow-g9343-AFLA_100300 | 3164602 | 3166922 | + |
| BGC_44 | tig00000050_arrow_pilon | tig00000050_arrow-g9344-AFLA_100290 | 3166995 | 3168158 | - |
| BGC_44 | tig00000050_arrow_pilon | tig00000050_arrow-g9345-AFLA_100280 | 3168749 | 3170292 | - |
| BGC_44 | tig00000050_arrow_pilon | tig00000050_arrow-g9346-AFLA_100270 | 3171096 | 3172396 | + |
| BGC_45 | tig00101497_arrow_pilon | tig00101497_arrow-g936-AFLA_083210  | 2954118 | 2954876 | + |
| BGC_45 | tig00101497_arrow_pilon | tig00101497_arrow-g937-AFLA_083220  | 2954950 | 2957127 | - |
| BGC_45 | tig00101497_arrow_pilon | tig00101497_arrow-g938-AFLA_083230  | 2957794 | 2958625 | - |
| BGC_45 | tig00101497_arrow_pilon | tig00101497_arrow-g939-AFLA_083240  | 2961692 | 2962899 | + |
| BGC_45 | tig00101497_arrow_pilon | tig00101497_arrow-g940-AFLA_083250  | 2963822 | 2965290 | - |
| BGC_45 | tig00101497_arrow_pilon | tig00101497_arrow-g941-AFLA_083270  | 2969250 | 2971273 | - |
| BGC_45 | tig00101497_arrow_pilon | tig00101497_arrow-g942-AFLA_083290  | 2972183 | 2976395 | - |
| BGC_46 | tig00101497_arrow_pilon | tig00101497_arrow-g1955-AFLA_054180 | 6413337 | 6414830 | + |
| BGC_46 | tig00101497_arrow_pilon | tig00101497_arrow-g1956-AFLA_054190 | 6415670 | 6416684 | - |
| BGC_46 | tig00101497_arrow_pilon | tig00101497_arrow-g1957             | 6416925 | 6417797 | - |
| BGC_46 | tig00101497_arrow_pilon | tig00101497_arrow-g1958             | 6420492 | 6421580 | + |
| BGC_46 | tig00101497_arrow_pilon | tig00101497_arrow-g1959-AFLA_054210 | 6422257 | 6423657 | + |
| BGC_46 | tig00101497_arrow_pilon | tig00101497_arrow-g1960-AFLA_054220 | 6423883 | 6424948 | - |
| BGC_46 | tig00101497_arrow_pilon | tig00101497_arrow-g1961-AFLA_054230 | 6426357 | 6427163 | + |
| BGC_46 | tig00101497_arrow_pilon | tig00101497_arrow-g1962-AFLA_054240 | 6428399 | 6428986 | - |
| BGC_46 | tig00101497_arrow_pilon | tig00101497_arrow-g1963-AFLA_054250 | 6429995 | 6431463 | + |
| BGC_46 | tig00101497_arrow_pilon | tig00101497_arrow-g1964-AFLA_054260 | 6432524 | 6434296 | + |
| BGC_46 | tig00101497_arrow_pilon | tig00101497_arrow-g1965-AFLA_054270 | 6434758 | 6438568 | - |
| BGC_46 | tig00101497_arrow_pilon | tig00101497_arrow-g1966-AFLA_054280 | 6440428 | 6440893 | + |
| BGC_46 | tig00101497_arrow_pilon | tig00101497_arrow-g1967-AFLA_054290 | 6441098 | 6442134 | - |
| BGC_46 | tig00101497_arrow_pilon | tig00101497_arrow-g1968-AFLA_054300 | 6442941 | 6444668 | + |
| BGC_46 | tig00101497_arrow_pilon | tig00101497_arrow-g1969-AFLA_054310 | 6444977 | 6447175 | - |
| BGC_46 | tig00101497_arrow_pilon | tig00101497_arrow-g1970-AFLA_054320 | 6449242 | 6450019 | + |
| BGC_46 | tig00101497_arrow_pilon | tig00101497_arrow-g1971-AFLA_054330 | 6450478 | 6451190 | + |
| BGC_46 | tig00101497_arrow_pilon | tig00101497_arrow-g1972-AFLA_054340 | 6451623 | 6452727 | + |
| BGC_46 | tig00101497_arrow_pilon | tig00101497_arrow-g1973-AFLA_054350 | 6453370 | 6454560 | + |
| BGC_46 | tig00101497_arrow_pilon | tig00101497_arrow-g1974-AFLA_054360 | 6455274 | 6456353 | - |
| BGC_46 | tig00101497_arrow_pilon | tig00101497_arrow-g1975-AFLA_054370 | 6457701 | 6458736 | + |
| BGC_47 | tig00000001_arrow_pilon | tig00000001_arrow-g3424-AFLA_028820 | 4693675 | 4695730 | - |
| BGC_47 | tig00000001_arrow_pilon | tig00000001_arrow-g3425-AFLA_028800 | 4696424 | 4697189 | - |
| BGC_47 | tig00000001_arrow_pilon | tig00000001_arrow-g3426-AFLA_028790 | 4697774 | 4702992 | + |
| BGC_47 | tig00000001_arrow_pilon | tig00000001_arrow-g3427-AFLA_028760 | 4703400 | 4706310 | - |
| BGC_47 | tig00000001_arrow_pilon | tig00000001_arrow-g3428-AFLA_028750 | 4708408 | 4709920 | + |
| BGC_47 | tig00000001_arrow_pilon | tig00000001_arrow-g3429-AFLA_028740 | 4710779 | 4712517 | + |
| BGC_47 | tig00000001_arrow_pilon | tig00000001_arrow-g3430-AFLA_028720 | 4713795 | 4716830 | + |
| BGC_47 | tig00000001_arrow_pilon | tig00000001_arrow-g3431-AFLA_028710 | 4718074 | 4718832 | - |
| BGC_47 | tig00000001_arrow_pilon | tig00000001_arrow-g3432-AFLA_028700 | 4720886 | 4721777 | + |
| BGC_47 | tig00000001_arrow_pilon | tig00000001_arrow-g3433-AFLA_028690 | 4722155 | 4723252 | - |
| BGC_47 | tig00000001_arrow_pilon | tig00000001_arrow-g3434-AFLA_028680 | 4723586 | 4724952 | - |
| BGC_47 | tig00000001_arrow_pilon | tig00000001_arrow-g3435-AFLA_028670 | 4726216 | 4730285 | + |
| BGC_47 | tig00000001_arrow_pilon | tig00000001_arrow-g3436-AFLA_028660 | 4730902 | 4734260 | + |

|        |                         |                                      |         |         |   |
|--------|-------------------------|--------------------------------------|---------|---------|---|
| BGC_47 | tig00000001_arrow_pilon | tig00000001_arrow-g3437-AFLA_028650  | 4734955 | 4735735 | - |
| BGC_47 | tig00000001_arrow_pilon | tig00000001_arrow-g3438-AFLA_028640  | 4736444 | 4738277 | - |
| BGC_48 | tig00000095_arrow_pilon | tig00000095_arrow-g11318-AFLA_010110 | 2476666 | 2478568 | + |
| BGC_48 | tig00000095_arrow_pilon | tig00000095_arrow-g11319-AFLA_010100 | 2480593 | 2481456 | + |
| BGC_48 | tig00000095_arrow_pilon | tig00000095_arrow-g11320             | 2482641 | 2483698 | - |
| BGC_48 | tig00000095_arrow_pilon | tig00000095_arrow-g11321-AFLA_010080 | 2484626 | 2485693 | - |
| BGC_48 | tig00000095_arrow_pilon | tig00000095_arrow-g11322-AFLA_010060 | 2486168 | 2487789 | - |
| BGC_48 | tig00000095_arrow_pilon | tig00000095_arrow-g11323-AFLA_010050 | 2488030 | 2489166 | - |
| BGC_48 | tig00000095_arrow_pilon | tig00000095_arrow-g11324-AFLA_010040 | 2490067 | 2492334 | + |
| BGC_48 | tig00000095_arrow_pilon | tig00000095_arrow-g11325-AFLA_010030 | 2493554 | 2494689 | - |
| BGC_48 | tig00000095_arrow_pilon | tig00000095_arrow-g11326-AFLA_010020 | 2495243 | 2499353 | + |
| BGC_48 | tig00000095_arrow_pilon | tig00000095_arrow-g11327-AFLA_010000 | 2500097 | 2511797 | - |
| BGC_48 | tig00000095_arrow_pilon | tig00000095_arrow-g11328-AFLA_009990 | 2513163 | 2514405 | + |
| BGC_48 | tig00000095_arrow_pilon | tig00000095_arrow-g11329-AFLA_009980 | 2514792 | 2519012 | - |
| BGC_48 | tig00000095_arrow_pilon | tig00000095_arrow-g11330             | 2519996 | 2520691 | - |
| BGC_48 | tig00000095_arrow_pilon | tig00000095_arrow-g11331             | 2523030 | 2524081 | - |
| BGC_48 | tig00000095_arrow_pilon | tig00000095_arrow-g11332-AFLA_009960 | 2524732 | 2525277 | + |
| BGC_48 | tig00000095_arrow_pilon | tig00000095_arrow-g11333-AFLA_009950 | 2525292 | 2528451 | - |
| BGC_48 | tig00000095_arrow_pilon | tig00000095_arrow-g11334-AFLA_009930 | 2530355 | 2534194 | + |
| BGC_49 | tig00000050_arrow_pilon | tig00000050_arrow-g9457              | 3544227 | 3547097 | + |
| BGC_49 | tig00000050_arrow_pilon | tig00000050_arrow-g9458-AFLA_098990  | 3547692 | 3549127 | + |
| BGC_49 | tig00000050_arrow_pilon | tig00000050_arrow-g9459-AFLA_098980  | 3549614 | 3551347 | - |
| BGC_49 | tig00000050_arrow_pilon | tig00000050_arrow-g9460-AFLA_098960  | 3552215 | 3552787 | + |
| BGC_49 | tig00000050_arrow_pilon | tig00000050_arrow-g9461              | 3553837 | 3554964 | - |
| BGC_49 | tig00000050_arrow_pilon | tig00000050_arrow-g9462              | 3556467 | 3558343 | - |
| BGC_49 | tig00000050_arrow_pilon | tig00000050_arrow-g9463-AFLA_098940  | 3558955 | 3561890 | - |
| BGC_49 | tig00000050_arrow_pilon | tig00000050_arrow-g9464-AFLA_098930  | 3562259 | 3563750 | - |
| BGC_49 | tig00000050_arrow_pilon | tig00000050_arrow-g9465-AFLA_098920  | 3564507 | 3565412 | + |
| BGC_50 | tig00000029_arrow_pilon | tig00000029_arrow-g6000-AFLA_018250  | 1497732 | 1502298 | - |
| BGC_50 | tig00000029_arrow_pilon | tig00000029_arrow-g6001-AFLA_018260  | 1502629 | 1503138 | + |
| BGC_50 | tig00000029_arrow_pilon | tig00000029_arrow-g6002              | 1503789 | 1505507 | - |
| BGC_50 | tig00000029_arrow_pilon | tig00000029_arrow-g6003-AFLA_018280  | 1506254 | 1507273 | + |
| BGC_50 | tig00000029_arrow_pilon | tig00000029_arrow-g6004-AFLA_018290  | 1507380 | 1508296 | - |
| BGC_50 | tig00000029_arrow_pilon | tig00000029_arrow-g6005-AFLA_018300  | 1509148 | 1510104 | - |
| BGC_50 | tig00000029_arrow_pilon | tig00000029_arrow-g6006-AFLA_018310  | 1511148 | 1512382 | + |
| BGC_50 | tig00000029_arrow_pilon | tig00000029_arrow-g6007-AFLA_018320  | 1512802 | 1513761 | - |
| BGC_50 | tig00000029_arrow_pilon | tig00000029_arrow-g6008-AFLA_018340  | 1516972 | 1518212 | + |
| BGC_50 | tig00000029_arrow_pilon | tig00000029_arrow-g6009              | 1519034 | 1520285 | - |
| BGC_50 | tig00000029_arrow_pilon | tig00000029_arrow-g6010-AFLA_018350  | 1520914 | 1521633 | - |
| BGC_51 | tig00000095_arrow_pilon | tig00000095_arrow-g10896-AFLA_119750 | 1075832 | 1076619 | - |
| BGC_51 | tig00000095_arrow_pilon | tig00000095_arrow-g10897-AFLA_119760 | 1077737 | 1081159 | + |
| BGC_51 | tig00000095_arrow_pilon | tig00000095_arrow-g10898-AFLA_119770 | 1081447 | 1081935 | - |
| BGC_51 | tig00000095_arrow_pilon | tig00000095_arrow-g10899-AFLA_119780 | 1083032 | 1084206 | + |
| BGC_51 | tig00000095_arrow_pilon | tig00000095_arrow-g10900-AFLA_119790 | 1084504 | 1086400 | - |
| BGC_51 | tig00000095_arrow_pilon | tig00000095_arrow-g10901-AFLA_119800 | 1089831 | 1090608 | + |
| BGC_51 | tig00000095_arrow_pilon | tig00000095_arrow-g10902-AFLA_119810 | 1090956 | 1094439 | - |
| BGC_51 | tig00000095_arrow_pilon | tig00000095_arrow-g10903-AFLA_119820 | 1096425 | 1099526 | - |
| BGC_51 | tig00000095_arrow_pilon | tig00000095_arrow-g10904-AFLA_119830 | 1101936 | 1103724 | + |
| BGC_51 | tig00000095_arrow_pilon | tig00000095_arrow-g10905             | 1104761 | 1106272 | + |
| BGC_51 | tig00000095_arrow_pilon | tig00000095_arrow-g10906-AFLA_119850 | 1107871 | 1108996 | + |
| BGC_51 | tig00000095_arrow_pilon | tig00000095_arrow-g10907-AFLA_119860 | 1109832 | 1111030 | - |
| BGC_51 | tig00000095_arrow_pilon | tig00000095_arrow-g10908-AFLA_119870 | 1113908 | 1114939 | + |
| BGC_51 | tig00000095_arrow_pilon | tig00000095_arrow-g10909-AFLA_119890 | 1116188 | 1119746 | - |
| BGC_52 | tig00000029_arrow_pilon | tig00000029_arrow-g5953-AFLA_017760  | 1355037 | 1357266 | + |
| BGC_52 | tig00000029_arrow_pilon | tig00000029_arrow-g5954-AFLA_017770  | 1357680 | 1358769 | + |
| BGC_52 | tig00000029_arrow_pilon | tig00000029_arrow-g5955-AFLA_017780  | 1359135 | 1361582 | + |

|        |                         |                                     |         |         |   |
|--------|-------------------------|-------------------------------------|---------|---------|---|
| BGC_52 | tig00000029_arrow_pilon | tig00000029_arrow-g5956-AFLA_017800 | 1362407 | 1364485 | - |
| BGC_52 | tig00000029_arrow_pilon | tig00000029_arrow-g5957-AFLA_017810 | 1366495 | 1367943 | - |
| BGC_52 | tig00000029_arrow_pilon | tig00000029_arrow-g5958-AFLA_017820 | 1368469 | 1371536 | + |
| BGC_52 | tig00000029_arrow_pilon | tig00000029_arrow-g5959             | 1372334 | 1374649 | - |
| BGC_52 | tig00000029_arrow_pilon | tig00000029_arrow-g5960-AFLA_017830 | 1375124 | 1375996 | + |
| BGC_52 | tig00000029_arrow_pilon | tig00000029_arrow-g5961-AFLA_017840 | 1377044 | 1380397 | + |
| BGC_52 | tig00000029_arrow_pilon | tig00000029_arrow-g5962-AFLA_017850 | 1381280 | 1382085 | - |
| BGC_52 | tig00000029_arrow_pilon | tig00000029_arrow-g5963-AFLA_017860 | 1383286 | 1383770 | - |
| BGC_52 | tig00000029_arrow_pilon | tig00000029_arrow-g5964-AFLA_017870 | 1386485 | 1388378 | + |
| BGC_52 | tig00000029_arrow_pilon | tig00000029_arrow-g5965-AFLA_017880 | 1388501 | 1389033 | - |
| BGC_52 | tig00000029_arrow_pilon | tig00000029_arrow-g5966-AFLA_017890 | 1389400 | 1391114 | + |
| BGC_52 | tig00000029_arrow_pilon | tig00000029_arrow-g5967-AFLA_017900 | 1394208 | 1397030 | + |
| BGC_52 | tig00000029_arrow_pilon | tig00000029_arrow-g5968-AFLA_017910 | 1399216 | 1401829 | + |
| BGC_53 | tig00000037_arrow_pilon | tig00000037_arrow-g7078-AFLA_062520 | 314066  | 315432  | + |
| BGC_53 | tig00000037_arrow_pilon | tig00000037_arrow-g7079-AFLA_062510 | 315760  | 317897  | - |
| BGC_53 | tig00000037_arrow_pilon | tig00000037_arrow-g7080-AFLA_062480 | 318578  | 323938  | - |
| BGC_53 | tig00000037_arrow_pilon | tig00000037_arrow-g7081-AFLA_062470 | 325060  | 326699  | + |
| BGC_53 | tig00000037_arrow_pilon | tig00000037_arrow-g7082-AFLA_062460 | 327454  | 328173  | - |
| BGC_53 | tig00000037_arrow_pilon | tig00000037_arrow-g7083-AFLA_062450 | 329561  | 331794  | - |
| BGC_53 | tig00000037_arrow_pilon | tig00000037_arrow-g7084-AFLA_062440 | 333381  | 333899  | + |
| BGC_53 | tig00000037_arrow_pilon | tig00000037_arrow-g7085-AFLA_062430 | 334570  | 335401  | - |
| BGC_54 | tig00101497_arrow_pilon | tig00101497_arrow-g694-AFLA_080410  | 2226912 | 2231932 | + |
| BGC_54 | tig00101497_arrow_pilon | tig00101497_arrow-g695-AFLA_080430  | 2234019 | 2234423 | + |
| BGC_54 | tig00101497_arrow_pilon | tig00101497_arrow-g696-AFLA_080440  | 2235809 | 2237494 | + |
| BGC_54 | tig00101497_arrow_pilon | tig00101497_arrow-g697-AFLA_080450  | 2237839 | 2240503 | - |
| BGC_54 | tig00101497_arrow_pilon | tig00101497_arrow-g698-AFLA_080460  | 2240773 | 2241159 | + |
| BGC_54 | tig00101497_arrow_pilon | tig00101497_arrow-g699-AFLA_080470  | 2242854 | 2246186 | + |
| BGC_54 | tig00101497_arrow_pilon | tig00101497_arrow-g700-AFLA_080480  | 2246596 | 2247363 | - |
| BGC_54 | tig00101497_arrow_pilon | tig00101497_arrow-g701-AFLA_080490  | 2247943 | 2260555 | - |
| BGC_54 | tig00101497_arrow_pilon | tig00101497_arrow-g702-AFLA_080510  | 2263041 | 2264576 | + |
| BGC_54 | tig00101497_arrow_pilon | tig00101497_arrow-g703-AFLA_080520  | 2265129 | 2266387 | + |
| BGC_54 | tig00101497_arrow_pilon | tig00101497_arrow-g704-AFLA_080530  | 2267132 | 2267856 | - |
| BGC_54 | tig00101497_arrow_pilon | tig00101497_arrow-g705-AFLA_080540  | 2269076 | 2272465 | + |
| BGC_54 | tig00101497_arrow_pilon | tig00101497_arrow-g706-AFLA_080550  | 2272999 | 2274192 | + |
| BGC_54 | tig00101497_arrow_pilon | tig00101497_arrow-g707-AFLA_080560  | 2275539 | 2277897 | + |
| BGC_54 | tig00101497_arrow_pilon | tig00101497_arrow-g708-AFLA_080570  | 2278992 | 2280120 | + |
| BGC_55 | tig00101497_arrow_pilon | tig00101497_arrow-g866-AFLA_082390  | 2737652 | 2740045 | + |
| BGC_55 | tig00101497_arrow_pilon | tig00101497_arrow-g867-AFLA_082400  | 2740249 | 2744963 | - |
| BGC_55 | tig00101497_arrow_pilon | tig00101497_arrow-g868-AFLA_082410  | 2745489 | 2746908 | - |
| BGC_55 | tig00101497_arrow_pilon | tig00101497_arrow-g869-AFLA_082430  | 2749629 | 2750882 | + |
| BGC_55 | tig00101497_arrow_pilon | tig00101497_arrow-g870-AFLA_082440  | 2751245 | 2752169 | + |
| BGC_55 | tig00101497_arrow_pilon | tig00101497_arrow-g871-AFLA_082450  | 2752434 | 2754302 | - |
| BGC_55 | tig00101497_arrow_pilon | tig00101497_arrow-g872-AFLA_082460  | 2755266 | 2755823 | + |
| BGC_55 | tig00101497_arrow_pilon | tig00101497_arrow-g873-AFLA_082470  | 2756556 | 2758587 | - |
| BGC_55 | tig00101497_arrow_pilon | tig00101497_arrow-g874-AFLA_082490  | 2758993 | 2766773 | + |
| BGC_55 | tig00101497_arrow_pilon | tig00101497_arrow-g875-AFLA_082500  | 2767295 | 2768635 | - |
| BGC_55 | tig00101497_arrow_pilon | tig00101497_arrow-g876-AFLA_082510  | 2769773 | 2770571 | + |
| BGC_55 | tig00101497_arrow_pilon | tig00101497_arrow-g877-AFLA_082520  | 2771128 | 2774749 | - |
| BGC_55 | tig00101497_arrow_pilon | tig00101497_arrow-g878-AFLA_082530  | 2775475 | 2776382 | - |
| BGC_55 | tig00101497_arrow_pilon | tig00101497_arrow-g879-AFLA_082540  | 2777507 | 2779071 | + |
| BGC_55 | tig00101497_arrow_pilon | tig00101497_arrow-g880-AFLA_082550  | 2779288 | 2782394 | - |
| BGC_55 | tig00101497_arrow_pilon | tig00101497_arrow-g881-AFLA_082560  | 2783048 | 2784790 | + |
| BGC_56 | tig00000050_arrow_pilon | tig00000050_arrow-g8900-AFLA_070200 | 1650406 | 1652721 | - |
| BGC_56 | tig00000050_arrow_pilon | tig00000050_arrow-g8901-AFLA_070220 | 1653496 | 1654458 | + |
| BGC_56 | tig00000050_arrow_pilon | tig00000050_arrow-g8902-AFLA_070230 | 1655199 | 1657221 | - |
| BGC_56 | tig00000050_arrow_pilon | tig00000050_arrow-g8903-AFLA_070240 | 1660120 | 1662633 | + |

|        |                         |                                     |         |         |   |
|--------|-------------------------|-------------------------------------|---------|---------|---|
| BGC_56 | tig00000050_arrow_pilon | tig00000050_arrow-g8904-AFLA_070250 | 1663284 | 1664131 | - |
| BGC_56 | tig00000050_arrow_pilon | tig00000050_arrow-g8905-AFLA_070270 | 1665934 | 1668001 | - |
| BGC_56 | tig00000050_arrow_pilon | tig00000050_arrow-g8906-AFLA_070280 | 1668807 | 1669778 | + |
| BGC_56 | tig00000050_arrow_pilon | tig00000050_arrow-g8907-AFLA_070290 | 1669861 | 1671823 | - |
| BGC_56 | tig00000050_arrow_pilon | tig00000050_arrow-g8908-AFLA_070310 | 1672316 | 1675372 | + |
| BGC_56 | tig00000050_arrow_pilon | tig00000050_arrow-g8909-AFLA_070320 | 1676900 | 1678784 | - |
| BGC_56 | tig00000050_arrow_pilon | tig00000050_arrow-g8910             | 1679570 | 1680784 | - |
| BGC_56 | tig00000050_arrow_pilon | tig00000050_arrow-g8911-AFLA_070330 | 1683653 | 1685017 | - |
| BGC_56 | tig00000050_arrow_pilon | tig00000050_arrow-g8912-AFLA_070340 | 1686263 | 1687790 | - |
| BGC_56 | tig00000050_arrow_pilon | tig00000050_arrow-g8913-AFLA_070350 | 1689277 | 1690362 | + |
| BGC_56 | tig00000050_arrow_pilon | tig00000050_arrow-g8914-AFLA_070360 | 1690920 | 1695638 | - |
| BGC_57 | tig00000037_arrow_pilon | tig00000037_arrow-g7824-AFLA_090110 | 2768581 | 2772876 | + |
| BGC_57 | tig00000037_arrow_pilon | tig00000037_arrow-g7825             | 2773184 | 2774596 | + |
| BGC_57 | tig00000037_arrow_pilon | tig00000037_arrow-g7826-AFLA_090120 | 2775102 | 2778596 | - |
| BGC_57 | tig00000037_arrow_pilon | tig00000037_arrow-g7827-AFLA_090140 | 2780959 | 2782163 | + |
| BGC_57 | tig00000037_arrow_pilon | tig00000037_arrow-g7828-AFLA_090150 | 2783312 | 2783932 | - |
| BGC_57 | tig00000037_arrow_pilon | tig00000037_arrow-g7829-AFLA_090160 | 2784588 | 2786653 | - |
| BGC_57 | tig00000037_arrow_pilon | tig00000037_arrow-g7830-AFLA_090170 | 2787167 | 2788871 | + |
| BGC_57 | tig00000037_arrow_pilon | tig00000037_arrow-g7831-AFLA_090180 | 2790312 | 2791202 | - |
| BGC_57 | tig00000037_arrow_pilon | tig00000037_arrow-g7832-AFLA_090190 | 2791715 | 2793062 | - |
| BGC_57 | tig00000037_arrow_pilon | tig00000037_arrow-g7833-AFLA_090200 | 2794716 | 2800694 | + |
| BGC_57 | tig00000037_arrow_pilon | tig00000037_arrow-g7834-AFLA_090210 | 2800934 | 2802812 | - |
| BGC_57 | tig00000037_arrow_pilon | tig00000037_arrow-g7835-AFLA_090220 | 2803257 | 2805982 | + |
| BGC_57 | tig00000037_arrow_pilon | tig00000037_arrow-g7836-AFLA_090240 | 2807077 | 2807834 | - |
| BGC_57 | tig00000037_arrow_pilon | tig00000037_arrow-g7837-AFLA_090250 | 2808759 | 2810042 | - |
| BGC_57 | tig00000037_arrow_pilon | tig00000037_arrow-g7838-AFLA_090260 | 2810819 | 2813042 | - |
| BGC_57 | tig00000037_arrow_pilon | tig00000037_arrow-g7839-AFLA_090300 | 2813883 | 2816606 | - |
| BGC_57 | tig00000037_arrow_pilon | tig00000037_arrow-g7840-AFLA_090320 | 2819338 | 2820459 | - |
| BGC_58 | tig00000023_arrow_pilon | tig00000023_arrow-g4007-AFLA_105000 | 243409  | 244062  | - |
| BGC_58 | tig00000023_arrow_pilon | tig00000023_arrow-g4008-AFLA_105010 | 245036  | 245797  | - |
| BGC_58 | tig00000023_arrow_pilon | tig00000023_arrow-g4009-AFLA_105020 | 246003  | 247147  | - |
| BGC_58 | tig00000023_arrow_pilon | tig00000023_arrow-g4010-AFLA_105030 | 247804  | 248292  | - |
| BGC_58 | tig00000023_arrow_pilon | tig00000023_arrow-g4011-AFLA_105040 | 250337  | 251755  | + |
| BGC_58 | tig00000023_arrow_pilon | tig00000023_arrow-g4012-AFLA_105050 | 253085  | 254220  | - |
| BGC_58 | tig00000023_arrow_pilon | tig00000023_arrow-g4013-AFLA_105060 | 255081  | 255890  | - |
| BGC_58 | tig00000023_arrow_pilon | tig00000023_arrow-g4014-AFLA_105070 | 256993  | 258760  | - |
| BGC_58 | tig00000023_arrow_pilon | tig00000023_arrow-g4015-AFLA_105080 | 259444  | 262405  | + |
| BGC_59 | tig00000029_arrow_pilon | tig00000029_arrow-g6766-AFLA_002980 | 4129813 | 4131003 | - |
| BGC_59 | tig00000029_arrow_pilon | tig00000029_arrow-g6767-AFLA_002970 | 4132014 | 4134236 | + |
| BGC_59 | tig00000029_arrow_pilon | tig00000029_arrow-g6768             | 4134618 | 4136104 | + |
| BGC_59 | tig00000029_arrow_pilon | tig00000029_arrow-g6769-AFLA_002950 | 4136527 | 4137479 | - |
| BGC_59 | tig00000029_arrow_pilon | tig00000029_arrow-g6770-AFLA_002940 | 4139065 | 4140608 | + |
| BGC_59 | tig00000029_arrow_pilon | tig00000029_arrow-g6771-AFLA_002920 | 4141621 | 4150236 | - |
| BGC_59 | tig00000029_arrow_pilon | tig00000029_arrow-g6772-AFLA_002900 | 4150881 | 4158170 | + |
| BGC_59 | tig00000029_arrow_pilon | tig00000029_arrow-g6773-AFLA_002890 | 4158623 | 4160415 | + |
| BGC_59 | tig00000029_arrow_pilon | tig00000029_arrow-g6774-AFLA_002880 | 4161555 | 4164575 | + |
| BGC_59 | tig00000029_arrow_pilon | tig00000029_arrow-g6775-AFLA_002870 | 4164749 | 4168522 | - |
| BGC_59 | tig00000029_arrow_pilon | tig00000029_arrow-g6776-AFLA_002850 | 4168907 | 4170012 | + |
| BGC_59 | tig00000029_arrow_pilon | tig00000029_arrow-g6777-AFLA_002840 | 4170433 | 4171066 | - |
| BGC_59 | tig00000029_arrow_pilon | tig00000029_arrow-g6778-AFLA_002830 | 4172867 | 4174476 | + |
| BGC_59 | tig00000029_arrow_pilon | tig00000029_arrow-g6779-AFLA_002820 | 4174958 | 4176160 | - |
| BGC_59 | tig00000029_arrow_pilon | tig00000029_arrow-g6780-AFLA_002810 | 4176541 | 4178259 | - |
| BGC_6  | tig00000023_arrow_pilon | tig00000023_arrow-g4040-AFLA_105370 | 336259  | 339550  | + |
| BGC_6  | tig00000023_arrow_pilon | tig00000023_arrow-g4041-AFLA_105380 | 340375  | 343563  | - |
| BGC_6  | tig00000023_arrow_pilon | tig00000023_arrow-g4042-AFLA_105400 | 344100  | 346517  | + |
| BGC_6  | tig00000023_arrow_pilon | tig00000023_arrow-g4043-AFLA_105410 | 347467  | 348747  | - |

|        |                         |                                     |         |         |   |
|--------|-------------------------|-------------------------------------|---------|---------|---|
| BGC_6  | tig00000023_arrow_pilon | tig00000023_arrow-g4044-AFLA_105420 | 349225  | 349817  | + |
| BGC_6  | tig00000023_arrow_pilon | tig00000023_arrow-g4045-AFLA_105430 | 350177  | 351485  | - |
| BGC_6  | tig00000023_arrow_pilon | tig00000023_arrow-g4046-AFLA_105440 | 351932  | 353278  | - |
| BGC_6  | tig00000023_arrow_pilon | tig00000023_arrow-g4047-AFLA_105450 | 354381  | 362612  | + |
| BGC_6  | tig00000023_arrow_pilon | tig00000023_arrow-g4048             | 363957  | 364566  | + |
| BGC_6  | tig00000023_arrow_pilon | tig00000023_arrow-g4049-AFLA_105470 | 365382  | 367063  | - |
| BGC_6  | tig00000023_arrow_pilon | tig00000023_arrow-g4050-AFLA_105480 | 367636  | 368227  | + |
| BGC_6  | tig00000023_arrow_pilon | tig00000023_arrow-g4051-AFLA_105490 | 368310  | 372691  | - |
| BGC_6  | tig00000023_arrow_pilon | tig00000023_arrow-g4052-AFLA_105500 | 374501  | 375561  | - |
| BGC_6  | tig00000023_arrow_pilon | tig00000023_arrow-g4053-AFLA_105510 | 376923  | 377843  | + |
| BGC_6  | tig00000023_arrow_pilon | tig00000023_arrow-g4054-AFLA_105520 | 377968  | 378840  | - |
| BGC_6  | tig00000023_arrow_pilon | tig00000023_arrow-g4055-AFLA_105530 | 379167  | 381424  | - |
| BGC_6  | tig00000023_arrow_pilon | tig00000023_arrow-g4056-AFLA_105540 | 381639  | 383506  | + |
| BGC_60 | tig00101499_arrow_pilon | tig00101499_arrow-g9716             | 299499  | 300593  | + |
| BGC_60 | tig00101499_arrow_pilon | tig00101499_arrow-g9717-AFLA_039200 | 300995  | 302524  | - |
| BGC_60 | tig00101499_arrow_pilon | tig00101499_arrow-g9718-AFLA_039210 | 302873  | 304663  | + |
| BGC_60 | tig00101499_arrow_pilon | tig00101499_arrow-g9719-AFLA_039220 | 304966  | 307054  | - |
| BGC_60 | tig00101499_arrow_pilon | tig00101499_arrow-g9720-AFLA_039230 | 307367  | 308451  | + |
| BGC_60 | tig00101499_arrow_pilon | tig00101499_arrow-g9721-AFLA_039240 | 308793  | 309949  | + |
| BGC_60 | tig00101499_arrow_pilon | tig00101499_arrow-g9722-AFLA_039250 | 310655  | 312059  | - |
| BGC_60 | tig00101499_arrow_pilon | tig00101499_arrow-g9723-AFLA_039270 | 312622  | 316819  | + |
| BGC_60 | tig00101499_arrow_pilon | tig00101499_arrow-g9724-AFLA_039290 | 318811  | 319845  | + |
| BGC_61 | tig00000037_arrow_pilon | tig00000037_arrow-g7216-AFLA_060730 | 798116  | 801573  | + |
| BGC_61 | tig00000037_arrow_pilon | tig00000037_arrow-g7217-AFLA_060720 | 802105  | 803536  | - |
| BGC_61 | tig00000037_arrow_pilon | tig00000037_arrow-g7218-AFLA_060710 | 804184  | 805579  | - |
| BGC_61 | tig00000037_arrow_pilon | tig00000037_arrow-g7219-AFLA_060700 | 806065  | 808317  | - |
| BGC_61 | tig00000037_arrow_pilon | tig00000037_arrow-g7220-AFLA_060690 | 808878  | 810645  | - |
| BGC_61 | tig00000037_arrow_pilon | tig00000037_arrow-g7221-AFLA_060680 | 810815  | 812255  | + |
| BGC_61 | tig00000037_arrow_pilon | tig00000037_arrow-g7222-AFLA_060660 | 813309  | 816696  | + |
| BGC_61 | tig00000037_arrow_pilon | tig00000037_arrow-g7223-AFLA_060650 | 817139  | 819279  | + |
| BGC_61 | tig00000037_arrow_pilon | tig00000037_arrow-g7224-AFLA_060640 | 819928  | 826087  | + |
| BGC_62 | tig00000029_arrow_pilon | tig00000029_arrow-g6481-AFLA_006240 | 3093403 | 3098907 | + |
| BGC_62 | tig00000029_arrow_pilon | tig00000029_arrow-g6482-AFLA_006230 | 3099695 | 3100900 | - |
| BGC_62 | tig00000029_arrow_pilon | tig00000029_arrow-g6483-AFLA_006220 | 3101358 | 3102746 | + |
| BGC_62 | tig00000029_arrow_pilon | tig00000029_arrow-g6484-AFLA_006210 | 3103358 | 3107176 | - |
| BGC_62 | tig00000029_arrow_pilon | tig00000029_arrow-g6485-AFLA_006180 | 3109174 | 3111297 | + |
| BGC_62 | tig00000029_arrow_pilon | tig00000029_arrow-g6486-AFLA_006170 | 3112759 | 3119409 | + |
| BGC_62 | tig00000029_arrow_pilon | tig00000029_arrow-g6487-AFLA_006160 | 3120016 | 3123579 | - |
| BGC_62 | tig00000029_arrow_pilon | tig00000029_arrow-g6488-AFLA_006150 | 3124046 | 3125573 | - |
| BGC_62 | tig00000029_arrow_pilon | tig00000029_arrow-g6489-AFLA_006140 | 3126195 | 3130521 | + |
| BGC_62 | tig00000029_arrow_pilon | tig00000029_arrow-g6490-AFLA_006130 | 3130793 | 3132147 | - |
| BGC_62 | tig00000029_arrow_pilon | tig00000029_arrow-g6491-AFLA_006120 | 3132611 | 3135532 | + |
| BGC_62 | tig00000029_arrow_pilon | tig00000029_arrow-g6492-AFLA_006110 | 3135927 | 3139565 | - |
| BGC_63 | tig00101497_arrow_pilon | tig00101497_arrow-g1943-AFLA_054050 | 6364029 | 6372365 | - |
| BGC_63 | tig00101497_arrow_pilon | tig00101497_arrow-g1944-AFLA_054060 | 6375114 | 6376061 | - |
| BGC_63 | tig00101497_arrow_pilon | tig00101497_arrow-g1945-AFLA_054070 | 6376658 | 6377176 | + |
| BGC_63 | tig00101497_arrow_pilon | tig00101497_arrow-g1946-AFLA_054080 | 6377952 | 6379367 | + |
| BGC_63 | tig00101497_arrow_pilon | tig00101497_arrow-g1947-AFLA_054090 | 6379819 | 6387913 | - |
| BGC_63 | tig00101497_arrow_pilon | tig00101497_arrow-g1948-AFLA_054100 | 6388213 | 6388812 | - |
| BGC_63 | tig00101497_arrow_pilon | tig00101497_arrow-g1949             | 6391802 | 6392629 | - |
| BGC_63 | tig00101497_arrow_pilon | tig00101497_arrow-g1950-AFLA_054120 | 6395799 | 6398315 | + |
| BGC_63 | tig00101497_arrow_pilon | tig00101497_arrow-g1951-AFLA_054130 | 6399914 | 6401513 | + |
| BGC_63 | tig00101497_arrow_pilon | tig00101497_arrow-g1952-AFLA_054140 | 6402593 | 6403107 | + |
| BGC_63 | tig00101497_arrow_pilon | tig00101497_arrow-g1953             | 6404536 | 6405449 | + |
| BGC_63 | tig00101497_arrow_pilon | tig00101497_arrow-g1954-AFLA_054150 | 6405896 | 6408592 | - |
| BGC_64 | tig00000001_arrow_pilon | tig00000001_arrow-g3546-AFLA_027300 | 5112202 | 5114972 | - |

|        |                         |                                     |         |         |   |
|--------|-------------------------|-------------------------------------|---------|---------|---|
| BGC_64 | tig00000001_arrow_pilon | tig00000001_arrow-g3547-AFLA_027290 | 5115537 | 5123746 | - |
| BGC_64 | tig00000001_arrow_pilon | tig00000001_arrow-g3548-AFLA_027260 | 5127138 | 5128856 | + |
| BGC_64 | tig00000001_arrow_pilon | tig00000001_arrow-g3549-AFLA_027250 | 5129379 | 5132487 | - |
| BGC_64 | tig00000001_arrow_pilon | tig00000001_arrow-g3550-AFLA_027240 | 5132972 | 5133823 | - |
| BGC_64 | tig00000001_arrow_pilon | tig00000001_arrow-g3551-AFLA_027230 | 5134852 | 5139303 | - |
| BGC_64 | tig00000001_arrow_pilon | tig00000001_arrow-g3552-AFLA_027210 | 5139999 | 5141873 | + |
| BGC_64 | tig00000001_arrow_pilon | tig00000001_arrow-g3553-AFLA_027200 | 5142493 | 5146748 | + |
| BGC_64 | tig00000001_arrow_pilon | tig00000001_arrow-g3554-AFLA_027190 | 5147197 | 5149365 | - |
| BGC_64 | tig00000001_arrow_pilon | tig00000001_arrow-g3555-AFLA_027180 | 5151294 | 5154063 | + |
| BGC_64 | tig00000001_arrow_pilon | tig00000001_arrow-g3556-AFLA_027170 | 5154443 | 5156192 | - |
| BGC_64 | tig00000001_arrow_pilon | tig00000001_arrow-g3557-AFLA_027160 | 5156673 | 5158256 | + |
| BGC_64 | tig00000001_arrow_pilon | tig00000001_arrow-g3558-AFLA_027150 | 5159099 | 5159938 | + |
| BGC_65 | tig00000023_arrow_pilon | tig00000023_arrow-g4665-AFLA_112780 | 2322285 | 2323115 | - |
| BGC_65 | tig00000023_arrow_pilon | tig00000023_arrow-g4666-AFLA_112790 | 2323494 | 2325110 | - |
| BGC_65 | tig00000023_arrow_pilon | tig00000023_arrow-g4667-AFLA_112800 | 2325745 | 2327182 | + |
| BGC_65 | tig00000023_arrow_pilon | tig00000023_arrow-g4668             | 2328218 | 2329639 | - |
| BGC_65 | tig00000023_arrow_pilon | tig00000023_arrow-g4669-AFLA_112810 | 2331908 | 2334173 | - |
| BGC_65 | tig00000023_arrow_pilon | tig00000023_arrow-g4670-AFLA_112820 | 2334893 | 2335824 | - |
| BGC_65 | tig00000023_arrow_pilon | tig00000023_arrow-g4671-AFLA_112830 | 2339530 | 2341827 | + |
| BGC_65 | tig00000023_arrow_pilon | tig00000023_arrow-g4672-AFLA_112840 | 2342756 | 2349780 | + |
| BGC_65 | tig00000023_arrow_pilon | tig00000023_arrow-g4673-AFLA_112850 | 2350267 | 2351673 | - |
| BGC_65 | tig00000023_arrow_pilon | tig00000023_arrow-g4674-AFLA_112860 | 2352425 | 2353508 | - |
| BGC_65 | tig00000023_arrow_pilon | tig00000023_arrow-g4675-AFLA_112870 | 2353874 | 2355390 | + |
| BGC_65 | tig00000023_arrow_pilon | tig00000023_arrow-g4676-AFLA_112880 | 2355826 | 2357940 | - |
| BGC_65 | tig00000023_arrow_pilon | tig00000023_arrow-g4677-AFLA_112890 | 2358480 | 2360009 | + |
| BGC_65 | tig00000023_arrow_pilon | tig00000023_arrow-g4678-AFLA_112900 | 2360427 | 2361287 | - |
| BGC_65 | tig00000023_arrow_pilon | tig00000023_arrow-g4679-AFLA_112910 | 2363398 | 2364305 | - |
| BGC_65 | tig00000023_arrow_pilon | tig00000023_arrow-g4680-AFLA_112920 | 2367075 | 2368738 | - |
| BGC_66 | tig00000029_arrow_pilon | tig00000029_arrow-g6633-AFLA_004520 | 3640895 | 3642087 | + |
| BGC_66 | tig00000029_arrow_pilon | tig00000029_arrow-g6634-AFLA_004510 | 3642465 | 3643214 | + |
| BGC_66 | tig00000029_arrow_pilon | tig00000029_arrow-g6635-AFLA_004500 | 3645103 | 3647565 | + |
| BGC_66 | tig00000029_arrow_pilon | tig00000029_arrow-g6636-AFLA_004480 | 3650073 | 3652791 | + |
| BGC_66 | tig00000029_arrow_pilon | tig00000029_arrow-g6637             | 3654341 | 3655463 | - |
| BGC_66 | tig00000029_arrow_pilon | tig00000029_arrow-g6638-AFLA_004470 | 3656228 | 3656636 | - |
| BGC_66 | tig00000029_arrow_pilon | tig00000029_arrow-g6639-AFLA_004460 | 3657867 | 3659325 | - |
| BGC_66 | tig00000029_arrow_pilon | tig00000029_arrow-g6640-AFLA_004450 | 3660524 | 3676847 | - |
| BGC_66 | tig00000029_arrow_pilon | tig00000029_arrow-g6641-AFLA_004440 | 3677921 | 3682350 | + |
| BGC_66 | tig00000029_arrow_pilon | tig00000029_arrow-g6642-AFLA_004430 | 3683276 | 3689653 | + |
| BGC_66 | tig00000029_arrow_pilon | tig00000029_arrow-g6643-AFLA_004410 | 3692019 | 3692384 | + |
| BGC_66 | tig00000029_arrow_pilon | tig00000029_arrow-g6644-AFLA_004390 | 3694616 | 3696286 | - |
| BGC_67 | tig00000023_arrow_pilon | tig00000023_arrow-g5357-AFLA_137780 | 4697664 | 4699940 | + |
| BGC_67 | tig00000023_arrow_pilon | tig00000023_arrow-g5358-AFLA_137790 | 4700527 | 4701097 | + |
| BGC_67 | tig00000023_arrow_pilon | tig00000023_arrow-g5359-AFLA_137800 | 4701946 | 4702397 | + |
| BGC_67 | tig00000023_arrow_pilon | tig00000023_arrow-g5360-AFLA_137810 | 4703164 | 4704757 | - |
| BGC_67 | tig00000023_arrow_pilon | tig00000023_arrow-g5361-AFLA_137820 | 4705310 | 4707136 | + |
| BGC_67 | tig00000023_arrow_pilon | tig00000023_arrow-g5362-AFLA_137840 | 4707356 | 4709918 | - |
| BGC_67 | tig00000023_arrow_pilon | tig00000023_arrow-g5363-AFLA_137850 | 4710941 | 4712103 | - |
| BGC_67 | tig00000023_arrow_pilon | tig00000023_arrow-g5364-AFLA_137860 | 4713351 | 4714682 | + |
| BGC_67 | tig00000023_arrow_pilon | tig00000023_arrow-g5365-AFLA_137870 | 4715622 | 4725508 | + |
| BGC_67 | tig00000023_arrow_pilon | tig00000023_arrow-g5366-AFLA_137890 | 4727244 | 4727960 | + |
| BGC_67 | tig00000023_arrow_pilon | tig00000023_arrow-g5367-AFLA_137900 | 4729387 | 4729825 | + |
| BGC_67 | tig00000023_arrow_pilon | tig00000023_arrow-g5368-AFLA_137910 | 4732179 | 4733383 | + |
| BGC_67 | tig00000023_arrow_pilon | tig00000023_arrow-g5369-AFLA_137920 | 4733627 | 4735424 | - |
| BGC_67 | tig00000023_arrow_pilon | tig00000023_arrow-g5370-AFLA_137930 | 4737353 | 4739047 | + |
| BGC_67 | tig00000023_arrow_pilon | tig00000023_arrow-g5371-AFLA_137940 | 4740546 | 4741079 | - |
| BGC_67 | tig00000023_arrow_pilon | tig00000023_arrow-g5372-AFLA_137950 | 4742114 | 4743837 | - |

|        |                         |                                     |         |         |   |
|--------|-------------------------|-------------------------------------|---------|---------|---|
| BGC_67 | tig00000023_arrow_pilon | tig00000023_arrow-g5373-AFLA_137960 | 4744324 | 4746441 | - |
| BGC_68 | tig00101499_arrow_pilon | tig00101499_arrow-g9636-AFLA_038240 | 24970   | 27657   | + |
| BGC_68 | tig00101499_arrow_pilon | tig00101499_arrow-g9637-AFLA_038260 | 28432   | 29881   | - |
| BGC_68 | tig00101499_arrow_pilon | tig00101499_arrow-g9638-AFLA_038270 | 31489   | 32731   | - |
| BGC_68 | tig00101499_arrow_pilon | tig00101499_arrow-g9639-AFLA_038280 | 34366   | 36687   | + |
| BGC_68 | tig00101499_arrow_pilon | tig00101499_arrow-g9640-AFLA_038290 | 38127   | 42404   | - |
| BGC_68 | tig00101499_arrow_pilon | tig00101499_arrow-g9641-AFLA_038300 | 44460   | 46208   | + |
| BGC_68 | tig00101499_arrow_pilon | tig00101499_arrow-g9642-AFLA_038310 | 46880   | 54382   | - |
| BGC_68 | tig00101499_arrow_pilon | tig00101499_arrow-g9643-AFLA_038320 | 55053   | 60607   | - |
| BGC_68 | tig00101499_arrow_pilon | tig00101499_arrow-g9644-AFLA_038340 | 62391   | 64946   | - |
| BGC_68 | tig00101499_arrow_pilon | tig00101499_arrow-g9645-AFLA_038350 | 66496   | 68823   | + |
| BGC_68 | tig00101499_arrow_pilon | tig00101499_arrow-g9646-AFLA_038360 | 69509   | 70350   | - |
| BGC_68 | tig00101499_arrow_pilon | tig00101499_arrow-g9647-AFLA_038370 | 73156   | 74283   | + |
| BGC_69 | tig00101497_arrow_pilon | tig00101497_arrow-g1925-AFLA_053740 | 6297024 | 6302226 | + |
| BGC_69 | tig00101497_arrow_pilon | tig00101497_arrow-g1926-AFLA_053810 | 6303413 | 6309256 | - |
| BGC_69 | tig00101497_arrow_pilon | tig00101497_arrow-g1927-AFLA_053820 | 6309903 | 6311587 | + |
| BGC_69 | tig00101497_arrow_pilon | tig00101497_arrow-g1928-AFLA_053830 | 6312254 | 6314447 | + |
| BGC_69 | tig00101497_arrow_pilon | tig00101497_arrow-g1929-AFLA_053840 | 6314645 | 6317314 | - |
| BGC_69 | tig00101497_arrow_pilon | tig00101497_arrow-g1930-AFLA_053850 | 6318829 | 6319995 | + |
| BGC_69 | tig00101497_arrow_pilon | tig00101497_arrow-g1931-AFLA_053870 | 6321350 | 6330412 | - |
| BGC_69 | tig00101497_arrow_pilon | tig00101497_arrow-g1932-AFLA_053890 | 6331566 | 6333272 | - |
| BGC_69 | tig00101497_arrow_pilon | tig00101497_arrow-g1933-AFLA_053910 | 6334227 | 6338349 | + |
| BGC_69 | tig00101497_arrow_pilon | tig00101497_arrow-g1934-AFLA_053920 | 6338672 | 6339332 | - |
| BGC_69 | tig00101497_arrow_pilon | tig00101497_arrow-g1935-AFLA_053930 | 6340620 | 6342433 | + |
| BGC_69 | tig00101497_arrow_pilon | tig00101497_arrow-g1936-AFLA_053950 | 6344702 | 6345705 | + |
| BGC_69 | tig00101497_arrow_pilon | tig00101497_arrow-g1937-AFLA_053960 | 6346331 | 6347083 | - |
| BGC_7  | tig00000023_arrow_pilon | tig00000023_arrow-g5519-AFLA_139620 | 5164597 | 5166378 | + |
| BGC_7  | tig00000023_arrow_pilon | tig00000023_arrow-g5520-AFLA_139630 | 5174255 | 5178443 | + |
| BGC_7  | tig00000023_arrow_pilon | tig00000023_arrow-g5521             | 5178779 | 5180689 | - |
| BGC_7  | tig00000023_arrow_pilon | tig00000023_arrow-g5522-AFLA_139670 | 5182528 | 5190575 | + |
| BGC_70 | tig00101497_arrow_pilon | tig00101497_arrow-g599-AFLA_079270  | 1898181 | 1899605 | - |
| BGC_70 | tig00101497_arrow_pilon | tig00101497_arrow-g600-AFLA_079280  | 1900243 | 1900725 | - |
| BGC_70 | tig00101497_arrow_pilon | tig00101497_arrow-g601-AFLA_079290  | 1900920 | 1902531 | - |
| BGC_70 | tig00101497_arrow_pilon | tig00101497_arrow-g602-AFLA_079300  | 1902924 | 1904443 | - |
| BGC_70 | tig00101497_arrow_pilon | tig00101497_arrow-g603-AFLA_079310  | 1904573 | 1905330 | + |
| BGC_70 | tig00101497_arrow_pilon | tig00101497_arrow-g604-AFLA_079320  | 1905562 | 1910354 | - |
| BGC_70 | tig00101497_arrow_pilon | tig00101497_arrow-g605-AFLA_079340  | 1911477 | 1912467 | + |
| BGC_70 | tig00101497_arrow_pilon | tig00101497_arrow-g606-AFLA_079350  | 1913965 | 1918089 | - |
| BGC_70 | tig00101497_arrow_pilon | tig00101497_arrow-g607-AFLA_079380  | 1919391 | 1922746 | + |
| BGC_70 | tig00101497_arrow_pilon | tig00101497_arrow-g608-AFLA_079390  | 1923693 | 1924200 | + |
| BGC_70 | tig00101497_arrow_pilon | tig00101497_arrow-g609-AFLA_079400  | 1926316 | 1930152 | + |
| BGC_70 | tig00101497_arrow_pilon | tig00101497_arrow-g610-AFLA_079410  | 1930660 | 1932619 | + |
| BGC_70 | tig00101497_arrow_pilon | tig00101497_arrow-g611-AFLA_079420  | 1932837 | 1933460 | - |
| BGC_70 | tig00101497_arrow_pilon | tig00101497_arrow-g612-AFLA_079430  | 1934316 | 1936179 | - |
| BGC_70 | tig00101497_arrow_pilon | tig00101497_arrow-g613-AFLA_079440  | 1937217 | 1938635 | + |
| BGC_70 | tig00101497_arrow_pilon | tig00101497_arrow-g614-AFLA_079450  | 1938899 | 1939636 | + |
| BGC_70 | tig00101497_arrow_pilon | tig00101497_arrow-g615-AFLA_079460  | 1939815 | 1942850 | - |
| BGC_70 | tig00101497_arrow_pilon | tig00101497_arrow-g616-AFLA_079470  | 1943461 | 1950093 | + |
| BGC_71 | tig00101499_arrow_pilon | tig00101499_arrow-g9662-AFLA_038550 | 114999  | 120459  | - |
| BGC_71 | tig00101499_arrow_pilon | tig00101499_arrow-g9663-AFLA_038560 | 120861  | 121619  | - |
| BGC_71 | tig00101499_arrow_pilon | tig00101499_arrow-g9664-AFLA_038570 | 122122  | 128754  | - |
| BGC_71 | tig00101499_arrow_pilon | tig00101499_arrow-g9665-AFLA_038580 | 129267  | 130641  | + |
| BGC_71 | tig00101499_arrow_pilon | tig00101499_arrow-g9666-AFLA_038590 | 131028  | 132220  | - |
| BGC_71 | tig00101499_arrow_pilon | tig00101499_arrow-g9667-AFLA_038600 | 134801  | 155692  | - |
| BGC_71 | tig00101499_arrow_pilon | tig00101499_arrow-g9668-AFLA_038610 | 159092  | 159974  | - |
| BGC_71 | tig00101499_arrow_pilon | tig00101499_arrow-g9669-AFLA_038620 | 160709  | 162297  | + |



|        |                         |                                      |         |         |   |
|--------|-------------------------|--------------------------------------|---------|---------|---|
| BGC_71 | tig00101499_arrow_pilon | tig00101499_arrow-g9670-AFLA_038630  | 162716  | 164572  | - |
| BGC_71 | tig00101499_arrow_pilon | tig00101499_arrow-g9671-AFLA_038640  | 165280  | 170421  | + |
| BGC_71 | tig00101499_arrow_pilon | tig00101499_arrow-g9672-AFLA_038650  | 171459  | 172694  | + |
| BGC_71 | tig00101499_arrow_pilon | tig00101499_arrow-g9673              | 174348  | 175979  | + |
| BGC_72 | tig00000037_arrow_pilon | tig00000037_arrow-g7043-AFLA_062940  | 198787  | 203739  | + |
| BGC_72 | tig00000037_arrow_pilon | tig00000037_arrow-g7044-AFLA_062920  | 204786  | 205421  | - |
| BGC_72 | tig00000037_arrow_pilon | tig00000037_arrow-g7045-AFLA_062910  | 205779  | 207942  | - |
| BGC_72 | tig00000037_arrow_pilon | tig00000037_arrow-g7046-AFLA_062900  | 208593  | 210719  | - |
| BGC_72 | tig00000037_arrow_pilon | tig00000037_arrow-g7047-AFLA_062890  | 212842  | 213245  | + |
| BGC_72 | tig00000037_arrow_pilon | tig00000037_arrow-g7048-AFLA_062880  | 214880  | 215713  | + |
| BGC_72 | tig00000037_arrow_pilon | tig00000037_arrow-g7049-AFLA_062870  | 216342  | 217094  | - |
| BGC_72 | tig00000037_arrow_pilon | tig00000037_arrow-g7050-AFLA_062860  | 219632  | 226369  | - |
| BGC_72 | tig00000037_arrow_pilon | tig00000037_arrow-g7051-AFLA_062850  | 227443  | 229125  | + |
| BGC_72 | tig00000037_arrow_pilon | tig00000037_arrow-g7052-AFLA_062840  | 230133  | 230927  | - |
| BGC_72 | tig00000037_arrow_pilon | tig00000037_arrow-g7053-AFLA_062830  | 231980  | 233519  | + |
| BGC_72 | tig00000037_arrow_pilon | tig00000037_arrow-g7054-AFLA_062820  | 235289  | 243181  | + |
| BGC_72 | tig00000037_arrow_pilon | tig00000037_arrow-g7055-AFLA_062810  | 244004  | 244751  | + |
| BGC_72 | tig00000037_arrow_pilon | tig00000037_arrow-g7056-AFLA_062800  | 246372  | 247403  | + |
| BGC_72 | tig00000037_arrow_pilon | tig00000037_arrow-g7057              | 250386  | 251666  | - |
| BGC_72 | tig00000037_arrow_pilon | tig00000037_arrow-g7058-AFLA_062770  | 254371  | 255513  | + |
| BGC_72 | tig00000037_arrow_pilon | tig00000037_arrow-g7059-AFLA_062760  | 255877  | 257125  | - |
| BGC_72 | tig00000037_arrow_pilon | tig00000037_arrow-g7060-AFLA_062750  | 257669  | 258668  | + |
| BGC_72 | tig00000037_arrow_pilon | tig00000037_arrow-g7061-AFLA_062740  | 258694  | 259868  | - |
| BGC_72 | tig00000037_arrow_pilon | tig00000037_arrow-g7062-AFLA_062730  | 260410  | 261456  | + |
| BGC_72 | tig00000037_arrow_pilon | tig00000037_arrow-g7063-AFLA_062720  | 262370  | 264226  | + |
| BGC_73 | tig00000037_arrow_pilon | tig00000037_arrow-g7774-AFLA_089530  | 2617276 | 2618539 | - |
| BGC_73 | tig00000037_arrow_pilon | tig00000037_arrow-g7775-AFLA_089540  | 2618979 | 2620490 | - |
| BGC_73 | tig00000037_arrow_pilon | tig00000037_arrow-g7776-AFLA_089550  | 2622437 | 2623152 | + |
| BGC_73 | tig00000037_arrow_pilon | tig00000037_arrow-g7777-AFLA_089560  | 2623784 | 2625535 | + |
| BGC_73 | tig00000037_arrow_pilon | tig00000037_arrow-g7778-AFLA_089570  | 2626355 | 2627425 | + |
| BGC_73 | tig00000037_arrow_pilon | tig00000037_arrow-g7779-AFLA_089580  | 2628021 | 2629681 | + |
| BGC_73 | tig00000037_arrow_pilon | tig00000037_arrow-g7780-AFLA_089590  | 2630161 | 2630553 | + |
| BGC_73 | tig00000037_arrow_pilon | tig00000037_arrow-g7781              | 2631292 | 2631876 | - |
| BGC_73 | tig00000037_arrow_pilon | tig00000037_arrow-g7782-AFLA_089610  | 2635561 | 2636927 | + |
| BGC_73 | tig00000037_arrow_pilon | tig00000037_arrow-g7783-AFLA_089620  | 2637850 | 2639173 | - |
| BGC_73 | tig00000037_arrow_pilon | tig00000037_arrow-g7784-AFLA_089630  | 2641363 | 2643165 | - |
| BGC_73 | tig00000037_arrow_pilon | tig00000037_arrow-g7785-AFLA_089640  | 2644672 | 2645202 | + |
| BGC_73 | tig00000037_arrow_pilon | tig00000037_arrow-g7786-AFLA_089650  | 2645733 | 2647073 | - |
| BGC_73 | tig00000037_arrow_pilon | tig00000037_arrow-g7787-AFLA_089660  | 2647705 | 2649746 | + |
| BGC_73 | tig00000037_arrow_pilon | tig00000037_arrow-g7788-AFLA_089670  | 2651520 | 2656665 | + |
| BGC_73 | tig00000037_arrow_pilon | tig00000037_arrow-g7789              | 2657628 | 2658314 | + |
| BGC_73 | tig00000037_arrow_pilon | tig00000037_arrow-g7790-AFLA_089690  | 2658981 | 2660417 | - |
| BGC_74 | tig00000095_arrow_pilon | tig00000095_arrow-g10773-AFLA_118340 | 699695  | 701509  | + |
| BGC_74 | tig00000095_arrow_pilon | tig00000095_arrow-g10774-AFLA_118350 | 701941  | 703404  | + |
| BGC_74 | tig00000095_arrow_pilon | tig00000095_arrow-g10775-AFLA_118360 | 703787  | 704704  | + |
| BGC_74 | tig00000095_arrow_pilon | tig00000095_arrow-g10776             | 705877  | 706293  | - |
| BGC_74 | tig00000095_arrow_pilon | tig00000095_arrow-g10777-AFLA_118370 | 707081  | 707924  | + |
| BGC_74 | tig00000095_arrow_pilon | tig00000095_arrow-g10778-AFLA_118380 | 708858  | 709991  | + |
| BGC_74 | tig00000095_arrow_pilon | tig00000095_arrow-g10779-AFLA_118390 | 710676  | 712529  | - |
| BGC_74 | tig00000095_arrow_pilon | tig00000095_arrow-g10780-AFLA_118410 | 713331  | 714759  | + |
| BGC_74 | tig00000095_arrow_pilon | tig00000095_arrow-g10781-AFLA_118420 | 715776  | 718549  | + |
| BGC_74 | tig00000095_arrow_pilon | tig00000095_arrow-g10782-AFLA_118440 | 719052  | 722355  | - |
| BGC_74 | tig00000095_arrow_pilon | tig00000095_arrow-g10783-AFLA_118450 | 723797  | 725851  | - |
| BGC_74 | tig00000095_arrow_pilon | tig00000095_arrow-g10784-AFLA_118460 | 726208  | 730406  | - |
| BGC_74 | tig00000095_arrow_pilon | tig00000095_arrow-g10785             | 732896  | 733355  | - |
| BGC_74 | tig00000095_arrow_pilon | tig00000095_arrow-g10786-AFLA_118470 | 735170  | 736341  | + |

|        |                         |                                      |         |         |   |
|--------|-------------------------|--------------------------------------|---------|---------|---|
| BGC_74 | tig00000095_arrow_pilon | tig00000095_arrow-g10787             | 740029  | 740780  | - |
| BGC_74 | tig00000095_arrow_pilon | tig00000095_arrow-g10788-AFLA_118490 | 741746  | 741997  | + |
| BGC_75 | tig00000029_arrow_pilon | tig00000029_arrow-g6423-AFLA_006920  | 2941693 | 2943146 | - |
| BGC_75 | tig00000029_arrow_pilon | tig00000029_arrow-g6424-AFLA_006900  | 2945081 | 2946238 | - |
| BGC_75 | tig00000029_arrow_pilon | tig00000029_arrow-g6425-AFLA_006890  | 2946848 | 2947990 | - |
| BGC_75 | tig00000029_arrow_pilon | tig00000029_arrow-g6426-AFLA_006880  | 2948576 | 2949794 | + |
| BGC_75 | tig00000029_arrow_pilon | tig00000029_arrow-g6427-AFLA_006870  | 2950298 | 2951796 | - |
| BGC_75 | tig00000029_arrow_pilon | tig00000029_arrow-g6428-AFLA_006860  | 2952162 | 2954566 | - |
| BGC_75 | tig00000029_arrow_pilon | tig00000029_arrow-g6429-AFLA_006850  | 2954845 | 2956378 | + |
| BGC_75 | tig00000029_arrow_pilon | tig00000029_arrow-g6430-AFLA_006840  | 2956679 | 2957266 | - |
| BGC_75 | tig00000029_arrow_pilon | tig00000029_arrow-g6431-AFLA_006830  | 2957809 | 2960482 | - |
| BGC_75 | tig00000029_arrow_pilon | tig00000029_arrow-g6432-AFLA_006810  | 2960739 | 2961563 | + |
| BGC_75 | tig00000029_arrow_pilon | tig00000029_arrow-g6433-AFLA_006800  | 2961931 | 2966267 | - |
| BGC_76 | tig00000095_arrow_pilon | tig00000095_arrow-g10715-AFLA_117740 | 540406  | 542256  | + |
| BGC_76 | tig00000095_arrow_pilon | tig00000095_arrow-g10716-AFLA_117750 | 542835  | 543845  | - |
| BGC_76 | tig00000095_arrow_pilon | tig00000095_arrow-g10717-AFLA_117760 | 544346  | 546023  | - |
| BGC_76 | tig00000095_arrow_pilon | tig00000095_arrow-g10718-AFLA_117770 | 547169  | 548854  | - |
| BGC_76 | tig00000095_arrow_pilon | tig00000095_arrow-g10719-AFLA_117780 | 549682  | 551291  | + |
| BGC_76 | tig00000095_arrow_pilon | tig00000095_arrow-g10720-AFLA_117790 | 551847  | 552703  | - |
| BGC_76 | tig00000095_arrow_pilon | tig00000095_arrow-g10721-AFLA_117800 | 555075  | 556861  | + |
| BGC_76 | tig00000095_arrow_pilon | tig00000095_arrow-g10722-AFLA_117810 | 557564  | 558973  | - |
| BGC_76 | tig00000095_arrow_pilon | tig00000095_arrow-g10723-AFLA_117820 | 559535  | 562021  | - |
| BGC_77 | tig00000095_arrow_pilon | tig00000095_arrow-g11423-AFLA_008840 | 2833600 | 2838899 | - |
| BGC_77 | tig00000095_arrow_pilon | tig00000095_arrow-g11424-AFLA_008830 | 2841267 | 2844114 | + |
| BGC_77 | tig00000095_arrow_pilon | tig00000095_arrow-g11425-AFLA_008790 | 2851543 | 2852347 | + |
| BGC_77 | tig00000095_arrow_pilon | tig00000095_arrow-g11426-AFLA_008780 | 2852438 | 2854740 | - |
| BGC_77 | tig00000095_arrow_pilon | tig00000095_arrow-g11427-AFLA_008770 | 2856426 | 2877460 | + |
| BGC_77 | tig00000095_arrow_pilon | tig00000095_arrow-g11428-AFLA_008750 | 2878105 | 2878569 | + |
| BGC_77 | tig00000095_arrow_pilon | tig00000095_arrow-g11429-AFLA_008720 | 2880345 | 2883473 | + |
| BGC_77 | tig00000095_arrow_pilon | tig00000095_arrow-g11430-AFLA_008700 | 2885417 | 2888669 | - |
| BGC_77 | tig00000095_arrow_pilon | tig00000095_arrow-g11431-AFLA_008680 | 2889113 | 2890466 | - |
| BGC_77 | tig00000095_arrow_pilon | tig00000095_arrow-g11432-AFLA_008670 | 2891142 | 2892332 | - |
| BGC_77 | tig00000095_arrow_pilon | tig00000095_arrow-g11433-AFLA_008660 | 2893282 | 2895039 | - |
| BGC_77 | tig00000095_arrow_pilon | tig00000095_arrow-g11434-AFLA_008650 | 2895431 | 2896570 | + |
| BGC_78 | tig00000050_arrow_pilon | tig00000050_arrow-g8821-AFLA_069290  | 1365907 | 1366419 | + |
| BGC_78 | tig00000050_arrow_pilon | tig00000050_arrow-g8822              | 1367675 | 1368685 | + |
| BGC_78 | tig00000050_arrow_pilon | tig00000050_arrow-g8823-AFLA_069300  | 1369444 | 1370753 | + |
| BGC_78 | tig00000050_arrow_pilon | tig00000050_arrow-g8824-AFLA_069310  | 1371213 | 1375267 | + |
| BGC_78 | tig00000050_arrow_pilon | tig00000050_arrow-g8825-AFLA_069320  | 1376178 | 1381483 | - |
| BGC_78 | tig00000050_arrow_pilon | tig00000050_arrow-g8826-AFLA_069330  | 1385831 | 1401845 | + |
| BGC_78 | tig00000050_arrow_pilon | tig00000050_arrow-g8827-AFLA_069350  | 1402414 | 1407729 | - |
| BGC_78 | tig00000050_arrow_pilon | tig00000050_arrow-g8828-AFLA_069360  | 1408667 | 1409079 | + |
| BGC_78 | tig00000050_arrow_pilon | tig00000050_arrow-g8829-AFLA_069370  | 1409763 | 1411148 | - |
| BGC_78 | tig00000050_arrow_pilon | tig00000050_arrow-g8830-AFLA_069380  | 1411979 | 1413104 | - |
| BGC_78 | tig00000050_arrow_pilon | tig00000050_arrow-g8831-AFLA_069390  | 1413795 | 1415728 | - |
| BGC_78 | tig00000050_arrow_pilon | tig00000050_arrow-g8832-AFLA_069400  | 1416018 | 1418599 | + |
| BGC_78 | tig00000050_arrow_pilon | tig00000050_arrow-g8833-AFLA_069410  | 1419655 | 1422141 | - |
| BGC_79 | tig00000050_arrow_pilon | tig00000050_arrow-g9170-AFLA_102390  | 2640506 | 2646375 | - |
| BGC_79 | tig00000050_arrow_pilon | tig00000050_arrow-g9171-AFLA_102360  | 2647180 | 2649369 | - |
| BGC_79 | tig00000050_arrow_pilon | tig00000050_arrow-g9172-AFLA_102340  | 2649693 | 2651587 | - |
| BGC_79 | tig00000050_arrow_pilon | tig00000050_arrow-g9173-AFLA_102330  | 2652158 | 2653249 | - |
| BGC_79 | tig00000050_arrow_pilon | tig00000050_arrow-g9174-AFLA_102320  | 2653791 | 2655317 | + |
| BGC_79 | tig00000050_arrow_pilon | tig00000050_arrow-g9175-AFLA_102300  | 2655936 | 2656475 | + |
| BGC_79 | tig00000050_arrow_pilon | tig00000050_arrow-g9176-AFLA_102290  | 2656672 | 2657677 | - |
| BGC_79 | tig00000050_arrow_pilon | tig00000050_arrow-g9177-AFLA_102270  | 2659939 | 2661562 | + |
| BGC_79 | tig00000050_arrow_pilon | tig00000050_arrow-g9178-AFLA_102260  | 2664561 | 2665427 | - |

|        |                         |                                     |         |         |   |
|--------|-------------------------|-------------------------------------|---------|---------|---|
| BGC_79 | tig00000050_arrow_pilon | tig00000050_arrow-g9179-AFLA_102250 | 2666044 | 2674077 | + |
| BGC_79 | tig00000050_arrow_pilon | tig00000050_arrow-g9180-AFLA_102240 | 2675431 | 2678618 | - |
| BGC_79 | tig00000050_arrow_pilon | tig00000050_arrow-g9181-AFLA_102230 | 2682065 | 2683741 | + |
| BGC_79 | tig00000050_arrow_pilon | tig00000050_arrow-g9182-AFLA_102220 | 2685849 | 2686547 | - |
| BGC_79 | tig00000050_arrow_pilon | tig00000050_arrow-g9183-AFLA_102210 | 2686851 | 2688878 | - |
| BGC_79 | tig00000050_arrow_pilon | tig00000050_arrow-g9184-AFLA_102200 | 2692056 | 2692856 | + |
| BGC_79 | tig00000050_arrow_pilon | tig00000050_arrow-g9185-AFLA_102180 | 2694858 | 2699623 | - |
| BGC_79 | tig00000050_arrow_pilon | tig00000050_arrow-g9186-AFLA_102160 | 2700320 | 2702581 | + |
| BGC_79 | tig00000050_arrow_pilon | tig00000050_arrow-g9187-AFLA_102150 | 2703282 | 2704641 | - |
| BGC_79 | tig00000050_arrow_pilon | tig00000050_arrow-g9188-AFLA_102140 | 2705820 | 2706846 | + |
| BGC_79 | tig00000050_arrow_pilon | tig00000050_arrow-g9189-AFLA_102130 | 2707276 | 2708893 | - |
| BGC_79 | tig00000050_arrow_pilon | tig00000050_arrow-g9190-AFLA_102120 | 2709971 | 2710852 | - |
| BGC_79 | tig00000050_arrow_pilon | tig00000050_arrow-g9191-AFLA_102110 | 2711695 | 2713284 | + |
| BGC_79 | tig00000050_arrow_pilon | tig00000050_arrow-g9192-AFLA_102090 | 2714731 | 2716009 | + |
| BGC_79 | tig00000050_arrow_pilon | tig00000050_arrow-g9193-AFLA_102080 | 2716889 | 2718230 | + |
| BGC_79 | tig00000050_arrow_pilon | tig00000050_arrow-g9194-AFLA_102060 | 2718675 | 2720197 | - |
| BGC_79 | tig00000050_arrow_pilon | tig00000050_arrow-g9195-AFLA_102050 | 2720860 | 2723056 | - |
| BGC_8  | tig00000029_arrow_pilon | tig00000029_arrow-g6650             | 3716418 | 3719325 | - |
| BGC_8  | tig00000029_arrow_pilon | tig00000029_arrow-g6651-AFLA_004300 | 3724014 | 3725354 | + |
| BGC_8  | tig00000029_arrow_pilon | tig00000029_arrow-g6652-AFLA_004290 | 3726285 | 3727667 | - |
| BGC_8  | tig00000029_arrow_pilon | tig00000029_arrow-g6653-AFLA_004280 | 3732230 | 3732997 | - |
| BGC_8  | tig00000029_arrow_pilon | tig00000029_arrow-g6654             | 3734878 | 3736377 | - |
| BGC_80 | tig00000050_arrow_pilon | tig00000050_arrow-g8951-AFLA_070810 | 1823653 | 1825836 | - |
| BGC_80 | tig00000050_arrow_pilon | tig00000050_arrow-g8952-AFLA_070820 | 1829045 | 1830902 | + |
| BGC_80 | tig00000050_arrow_pilon | tig00000050_arrow-g8953-AFLA_070830 | 1831299 | 1841240 | + |
| BGC_80 | tig00000050_arrow_pilon | tig00000050_arrow-g8954-AFLA_070850 | 1841359 | 1842737 | - |
| BGC_80 | tig00000050_arrow_pilon | tig00000050_arrow-g8955-AFLA_070860 | 1843275 | 1854599 | - |
| BGC_80 | tig00000050_arrow_pilon | tig00000050_arrow-g8956-AFLA_070870 | 1855625 | 1856620 | + |
| BGC_80 | tig00000050_arrow_pilon | tig00000050_arrow-g8957-AFLA_070880 | 1857354 | 1858638 | + |
| BGC_80 | tig00000050_arrow_pilon | tig00000050_arrow-g8958-AFLA_070890 | 1860463 | 1861565 | + |
| BGC_80 | tig00000050_arrow_pilon | tig00000050_arrow-g8959-AFLA_070900 | 1862334 | 1863363 | + |
| BGC_80 | tig00000050_arrow_pilon | tig00000050_arrow-g8960-AFLA_070910 | 1864371 | 1865772 | - |
| BGC_80 | tig00000050_arrow_pilon | tig00000050_arrow-g8961-AFLA_070920 | 1867026 | 1870052 | + |
| BGC_80 | tig00000050_arrow_pilon | tig00000050_arrow-g8962-AFLA_070930 | 1871204 | 1872745 | - |
| BGC_80 | tig00000050_arrow_pilon | tig00000050_arrow-g8963-AFLA_070940 | 1873256 | 1874940 | - |
| BGC_80 | tig00000050_arrow_pilon | tig00000050_arrow-g8964-AFLA_070950 | 1876950 | 1878206 | + |
| BGC_80 | tig00000050_arrow_pilon | tig00000050_arrow-g8965-AFLA_070960 | 1879840 | 1882356 | + |
| BGC_80 | tig00000050_arrow_pilon | tig00000050_arrow-g8966-AFLA_070970 | 1883207 | 1885733 | - |
| BGC_80 | tig00000050_arrow_pilon | tig00000050_arrow-g8967-AFLA_070980 | 1886150 | 1888703 | - |
| BGC_80 | tig00000050_arrow_pilon | tig00000050_arrow-g8968-AFLA_070990 | 1889744 | 1891923 | - |
| BGC_81 | tig00000001_arrow_pilon | tig00000001_arrow-g2215-AFLA_125670 | 661165  | 662598  | + |
| BGC_81 | tig00000001_arrow_pilon | tig00000001_arrow-g2216-AFLA_125680 | 663005  | 664931  | - |
| BGC_81 | tig00000001_arrow_pilon | tig00000001_arrow-g2217-AFLA_125690 | 665901  | 667706  | + |
| BGC_81 | tig00000001_arrow_pilon | tig00000001_arrow-g2218-AFLA_125700 | 667764  | 668807  | - |
| BGC_81 | tig00000001_arrow_pilon | tig00000001_arrow-g2219-AFLA_125710 | 670408  | 670899  | - |
| BGC_81 | tig00000001_arrow_pilon | tig00000001_arrow-g2220-AFLA_125730 | 673866  | 674428  | - |
| BGC_81 | tig00000001_arrow_pilon | tig00000001_arrow-g2221-AFLA_125740 | 675216  | 676248  | + |
| BGC_81 | tig00000001_arrow_pilon | tig00000001_arrow-g2222-AFLA_125750 | 676443  | 678063  | - |
| BGC_81 | tig00000001_arrow_pilon | tig00000001_arrow-g2223-AFLA_125760 | 678576  | 680597  | + |
| BGC_81 | tig00000001_arrow_pilon | tig00000001_arrow-g2224-AFLA_125770 | 680930  | 682621  | + |
| BGC_81 | tig00000001_arrow_pilon | tig00000001_arrow-g2225-AFLA_125780 | 683068  | 687111  | + |
| BGC_81 | tig00000001_arrow_pilon | tig00000001_arrow-g2226-AFLA_125790 | 687629  | 688870  | + |
| BGC_81 | tig00000001_arrow_pilon | tig00000001_arrow-g2227-AFLA_125800 | 689092  | 690255  | + |
| BGC_81 | tig00000001_arrow_pilon | tig00000001_arrow-g2228-AFLA_125810 | 692026  | 693295  | + |
| BGC_81 | tig00000001_arrow_pilon | tig00000001_arrow-g2229-AFLA_125820 | 694296  | 694847  | + |
| BGC_81 | tig00000001_arrow_pilon | tig00000001_arrow-g2230-AFLA_125830 | 695493  | 696059  | - |

|        |                         |                                      |         |         |   |
|--------|-------------------------|--------------------------------------|---------|---------|---|
| BGC_81 | tig00000001_arrow_pilon | tig00000001_arrow-g2231-AFLA_125840  | 698561  | 699264  | - |
| BGC_81 | tig00000001_arrow_pilon | tig00000001_arrow-g2232-AFLA_125850  | 700281  | 702228  | - |
| BGC_82 | tig00000001_arrow_pilon | tig00000001_arrow-g2202              | 619745  | 624258  | + |
| BGC_82 | tig00000001_arrow_pilon | tig00000001_arrow-g2203-AFLA_125530  | 624467  | 624880  | + |
| BGC_82 | tig00000001_arrow_pilon | tig00000001_arrow-g2204-AFLA_125540  | 626922  | 628090  | - |
| BGC_82 | tig00000001_arrow_pilon | tig00000001_arrow-g2205-AFLA_125560  | 628409  | 630043  | + |
| BGC_82 | tig00000001_arrow_pilon | tig00000001_arrow-g2206              | 630275  | 632494  | - |
| BGC_82 | tig00000001_arrow_pilon | tig00000001_arrow-g2207-AFLA_125590  | 633343  | 635442  | - |
| BGC_82 | tig00000001_arrow_pilon | tig00000001_arrow-g2208-AFLA_125600  | 635822  | 637635  | + |
| BGC_82 | tig00000001_arrow_pilon | tig00000001_arrow-g2209-AFLA_125610  | 638180  | 639976  | + |
| BGC_82 | tig00000001_arrow_pilon | tig00000001_arrow-g2210-AFLA_125620  | 640074  | 640721  | - |
| BGC_82 | tig00000001_arrow_pilon | tig00000001_arrow-g2211              | 641445  | 649840  | - |
| BGC_82 | tig00000001_arrow_pilon | tig00000001_arrow-g2212              | 650519  | 651411  | + |
| BGC_82 | tig00000001_arrow_pilon | tig00000001_arrow-g2213-AFLA_125650  | 652996  | 653403  | + |
| BGC_82 | tig00000001_arrow_pilon | tig00000001_arrow-g2214-AFLA_125660  | 656474  | 660164  | + |
| BGC_83 | tig00000095_arrow_pilon | tig00000095_arrow-g10572-AFLA_116140 | 108406  | 109691  | - |
| BGC_83 | tig00000095_arrow_pilon | tig00000095_arrow-g10573-AFLA_116150 | 111075  | 111682  | + |
| BGC_83 | tig00000095_arrow_pilon | tig00000095_arrow-g10574-AFLA_116160 | 111993  | 113211  | - |
| BGC_83 | tig00000095_arrow_pilon | tig00000095_arrow-g10575-AFLA_116170 | 115474  | 115862  | - |
| BGC_83 | tig00000095_arrow_pilon | tig00000095_arrow-g10576-AFLA_116180 | 116296  | 116997  | + |
| BGC_83 | tig00000095_arrow_pilon | tig00000095_arrow-g10577-AFLA_116190 | 117925  | 124205  | - |
| BGC_83 | tig00000095_arrow_pilon | tig00000095_arrow-g10578-AFLA_116200 | 125501  | 126007  | + |
| BGC_83 | tig00000095_arrow_pilon | tig00000095_arrow-g10579-AFLA_116210 | 127222  | 128594  | + |
| BGC_83 | tig00000095_arrow_pilon | tig00000095_arrow-g10580-AFLA_116220 | 129333  | 135798  | + |
| BGC_83 | tig00000095_arrow_pilon | tig00000095_arrow-g10581-AFLA_116230 | 136812  | 137975  | + |
| BGC_83 | tig00000095_arrow_pilon | tig00000095_arrow-g10582-AFLA_116240 | 139069  | 140016  | - |
| BGC_83 | tig00000095_arrow_pilon | tig00000095_arrow-g10583-AFLA_116250 | 140791  | 141856  | + |
| BGC_83 | tig00000095_arrow_pilon | tig00000095_arrow-g10584-AFLA_116260 | 142280  | 143289  | + |
| BGC_83 | tig00000095_arrow_pilon | tig00000095_arrow-g10585-AFLA_116270 | 144064  | 145305  | + |
| BGC_83 | tig00000095_arrow_pilon | tig00000095_arrow-g10586-AFLA_116280 | 145624  | 147525  | - |
| BGC_83 | tig00000095_arrow_pilon | tig00000095_arrow-g10587             | 147930  | 148407  | - |
| BGC_83 | tig00000095_arrow_pilon | tig00000095_arrow-g10588-AFLA_116300 | 148840  | 149649  | - |
| BGC_83 | tig00000095_arrow_pilon | tig00000095_arrow-g10589-AFLA_116320 | 152972  | 154895  | + |
| BGC_83 | tig00000095_arrow_pilon | tig00000095_arrow-g10590-AFLA_116330 | 155461  | 156775  | + |
| BGC_84 | tig00000037_arrow_pilon | tig00000037_arrow-g7271-AFLA_060080  | 965318  | 970705  | + |
| BGC_84 | tig00000037_arrow_pilon | tig00000037_arrow-g7272-AFLA_060070  | 971785  | 973596  | - |
| BGC_84 | tig00000037_arrow_pilon | tig00000037_arrow-g7273-AFLA_060060  | 974536  | 976208  | + |
| BGC_84 | tig00000037_arrow_pilon | tig00000037_arrow-g7274-AFLA_060050  | 977600  | 979372  | - |
| BGC_84 | tig00000037_arrow_pilon | tig00000037_arrow-g7275-AFLA_060040  | 980065  | 981402  | + |
| BGC_84 | tig00000037_arrow_pilon | tig00000037_arrow-g7276              | 981655  | 982455  | - |
| BGC_84 | tig00000037_arrow_pilon | tig00000037_arrow-g7277-AFLA_060030  | 982964  | 983998  | - |
| BGC_84 | tig00000037_arrow_pilon | tig00000037_arrow-g7278-AFLA_060020  | 986714  | 992785  | - |
| BGC_84 | tig00000037_arrow_pilon | tig00000037_arrow-g7279-AFLA_060000  | 993561  | 994786  | - |
| BGC_84 | tig00000037_arrow_pilon | tig00000037_arrow-g7280-AFLA_059990  | 995228  | 998692  | + |
| BGC_84 | tig00000037_arrow_pilon | tig00000037_arrow-g7281-AFLA_059980  | 999165  | 1000848 | - |
| BGC_84 | tig00000037_arrow_pilon | tig00000037_arrow-g7282-AFLA_059970  | 1002339 | 1003333 | + |
| BGC_84 | tig00000037_arrow_pilon | tig00000037_arrow-g7283-AFLA_059960  | 1003688 | 1004701 | - |
| BGC_84 | tig00000037_arrow_pilon | tig00000037_arrow-g7284-AFLA_059950  | 1006271 | 1007846 | - |
| BGC_84 | tig00000037_arrow_pilon | tig00000037_arrow-g7285-AFLA_059940  | 1008834 | 1009778 | - |
| BGC_85 | tig00000095_arrow_pilon | tig00000095_arrow-g10834-AFLA_119040 | 888092  | 888684  | + |
| BGC_85 | tig00000095_arrow_pilon | tig00000095_arrow-g10835-AFLA_119050 | 892327  | 893220  | - |
| BGC_85 | tig00000095_arrow_pilon | tig00000095_arrow-g10836-AFLA_119060 | 894116  | 894563  | + |
| BGC_85 | tig00000095_arrow_pilon | tig00000095_arrow-g10837-AFLA_119070 | 894713  | 895907  | + |
| BGC_85 | tig00000095_arrow_pilon | tig00000095_arrow-g10838             | 898602  | 898869  | + |
| BGC_85 | tig00000095_arrow_pilon | tig00000095_arrow-g10839-AFLA_119080 | 900560  | 902691  | - |
| BGC_85 | tig00000095_arrow_pilon | tig00000095_arrow-g10840-AFLA_119090 | 903319  | 904417  | - |

|        |                         |                                      |         |         |   |
|--------|-------------------------|--------------------------------------|---------|---------|---|
| BGC_85 | tig00000095_arrow_pilon | tig00000095_arrow-g10841-AFLA_119110 | 905358  | 908671  | + |
| BGC_85 | tig00000095_arrow_pilon | tig00000095_arrow-g10842-AFLA_119120 | 909250  | 910654  | + |
| BGC_85 | tig00000095_arrow_pilon | tig00000095_arrow-g10843-AFLA_119130 | 911123  | 911850  | + |
| BGC_85 | tig00000095_arrow_pilon | tig00000095_arrow-g10844-AFLA_119140 | 914981  | 915875  | + |
| BGC_85 | tig00000095_arrow_pilon | tig00000095_arrow-g10845-AFLA_119150 | 916319  | 917131  | - |
| BGC_85 | tig00000095_arrow_pilon | tig00000095_arrow-g10846-AFLA_119160 | 917923  | 919706  | - |
| BGC_85 | tig00000095_arrow_pilon | tig00000095_arrow-g10847-AFLA_119180 | 919746  | 920838  | + |
| BGC_85 | tig00000095_arrow_pilon | tig00000095_arrow-g10848             | 921626  | 923586  | - |
| BGC_85 | tig00000095_arrow_pilon | tig00000095_arrow-g10849-AFLA_119200 | 924049  | 924447  | + |
| BGC_85 | tig00000095_arrow_pilon | tig00000095_arrow-g10850-AFLA_119210 | 928310  | 929326  | + |
| BGC_86 | tig00000095_arrow_pilon | tig00000095_arrow-g10817-AFLA_118820 | 829091  | 830113  | - |
| BGC_86 | tig00000095_arrow_pilon | tig00000095_arrow-g10818-AFLA_118830 | 831156  | 833264  | + |
| BGC_86 | tig00000095_arrow_pilon | tig00000095_arrow-g10819-AFLA_118840 | 833439  | 834953  | - |
| BGC_86 | tig00000095_arrow_pilon | tig00000095_arrow-g10820             | 835547  | 836362  | + |
| BGC_86 | tig00000095_arrow_pilon | tig00000095_arrow-g10821-AFLA_118870 | 836991  | 837478  | - |
| BGC_86 | tig00000095_arrow_pilon | tig00000095_arrow-g10822-AFLA_118880 | 838072  | 841207  | + |
| BGC_86 | tig00000095_arrow_pilon | tig00000095_arrow-g10823-AFLA_118900 | 842242  | 843738  | + |
| BGC_86 | tig00000095_arrow_pilon | tig00000095_arrow-g10824-AFLA_118910 | 844714  | 846834  | + |
| BGC_86 | tig00000095_arrow_pilon | tig00000095_arrow-g10825-AFLA_118940 | 848937  | 856576  | - |
| BGC_86 | tig00000095_arrow_pilon | tig00000095_arrow-g10826-AFLA_118950 | 857383  | 858174  | - |
| BGC_86 | tig00000095_arrow_pilon | tig00000095_arrow-g10827-AFLA_118960 | 858491  | 865252  | - |
| BGC_86 | tig00000095_arrow_pilon | tig00000095_arrow-g10828-AFLA_118970 | 865975  | 867498  | + |
| BGC_86 | tig00000095_arrow_pilon | tig00000095_arrow-g10829-AFLA_118980 | 867626  | 868459  | - |
| BGC_86 | tig00000095_arrow_pilon | tig00000095_arrow-g10830-AFLA_118990 | 869682  | 871566  | + |
| BGC_86 | tig00000095_arrow_pilon | tig00000095_arrow-g10831-AFLA_119000 | 873371  | 874811  | + |
| BGC_86 | tig00000095_arrow_pilon | tig00000095_arrow-g10832-AFLA_119020 | 876408  | 881335  | - |
| BGC_86 | tig00000095_arrow_pilon | tig00000095_arrow-g10833-AFLA_119030 | 883671  | 885086  | - |
| BGC_87 | tig00000095_arrow_pilon | tig00000095_arrow-g10635-AFLA_116830 | 283545  | 289899  | + |
| BGC_87 | tig00000095_arrow_pilon | tig00000095_arrow-g10636-AFLA_116840 | 290292  | 291781  | - |
| BGC_87 | tig00000095_arrow_pilon | tig00000095_arrow-g10637-AFLA_116860 | 293247  | 297265  | - |
| BGC_87 | tig00000095_arrow_pilon | tig00000095_arrow-g10638-AFLA_116870 | 297708  | 299072  | - |
| BGC_87 | tig00000095_arrow_pilon | tig00000095_arrow-g10639-AFLA_116880 | 301490  | 303310  | + |
| BGC_87 | tig00000095_arrow_pilon | tig00000095_arrow-g10640-AFLA_116890 | 304030  | 311793  | + |
| BGC_87 | tig00000095_arrow_pilon | tig00000095_arrow-g10641-AFLA_116900 | 312152  | 312864  | - |
| BGC_87 | tig00000095_arrow_pilon | tig00000095_arrow-g10642-AFLA_116920 | 317039  | 317984  | + |
| BGC_87 | tig00000095_arrow_pilon | tig00000095_arrow-g10643             | 318437  | 320443  | + |
| BGC_87 | tig00000095_arrow_pilon | tig00000095_arrow-g10644             | 320551  | 321124  | - |
| BGC_87 | tig00000095_arrow_pilon | tig00000095_arrow-g10645             | 321999  | 323657  | - |
| BGC_87 | tig00000095_arrow_pilon | tig00000095_arrow-g10646-AFLA_116930 | 324907  | 326955  | - |
| BGC_87 | tig00000095_arrow_pilon | tig00000095_arrow-g10647-AFLA_116950 | 328837  | 330095  | + |
| BGC_88 | tig00000023_arrow_pilon | tig00000023_arrow-g4375-AFLA_109360  | 1417564 | 1421238 | + |
| BGC_88 | tig00000023_arrow_pilon | tig00000023_arrow-g4376-AFLA_109370  | 1421632 | 1422186 | - |
| BGC_88 | tig00000023_arrow_pilon | tig00000023_arrow-g4377-AFLA_109380  | 1424061 | 1425423 | + |
| BGC_88 | tig00000023_arrow_pilon | tig00000023_arrow-g4378-AFLA_109390  | 1426444 | 1427303 | + |
| BGC_88 | tig00000023_arrow_pilon | tig00000023_arrow-g4379-AFLA_109400  | 1429086 | 1430126 | - |
| BGC_88 | tig00000023_arrow_pilon | tig00000023_arrow-g4380-AFLA_109420  | 1431479 | 1436768 | + |
| BGC_88 | tig00000023_arrow_pilon | tig00000023_arrow-g4381-AFLA_109430  | 1437228 | 1451568 | - |
| BGC_88 | tig00000023_arrow_pilon | tig00000023_arrow-g4382-AFLA_109440  | 1453971 | 1456041 | + |
| BGC_88 | tig00000023_arrow_pilon | tig00000023_arrow-g4383-AFLA_109450  | 1460004 | 1461508 | + |
| BGC_88 | tig00000023_arrow_pilon | tig00000023_arrow-g4384-AFLA_109460  | 1461852 | 1463162 | - |
| BGC_88 | tig00000023_arrow_pilon | tig00000023_arrow-g4385-AFLA_109480  | 1463920 | 1465367 | - |
| BGC_88 | tig00000023_arrow_pilon | tig00000023_arrow-g4386-AFLA_109490  | 1468824 | 1471865 | + |
| BGC_88 | tig00000023_arrow_pilon | tig00000023_arrow-g4387-AFLA_109500  | 1472398 | 1473294 | - |
| BGC_88 | tig00000023_arrow_pilon | tig00000023_arrow-g4388-AFLA_109510  | 1473706 | 1475330 | + |
| BGC_88 | tig00000023_arrow_pilon | tig00000023_arrow-g4389-AFLA_109520  | 1475953 | 1477026 | - |
| BGC_89 | tig00101499_arrow_pilon | tig00101499_arrow-g10474-AFLA_114890 | 2837371 | 2839072 | - |

|                   |                         |                                      |         |         |   |
|-------------------|-------------------------|--------------------------------------|---------|---------|---|
| BGC_89            | tig00101499_arrow_pilon | tig00101499_arrow-g10475-AFLA_114880 | 2839925 | 2841851 | + |
| BGC_89            | tig00101499_arrow_pilon | tig00101499_arrow-g10476-AFLA_114860 | 2846380 | 2847657 | - |
| BGC_89            | tig00101499_arrow_pilon | tig00101499_arrow-g10477-AFLA_114840 | 2853129 | 2854459 | - |
| BGC_89            | tig00101499_arrow_pilon | tig00101499_arrow-g10478-AFLA_114830 | 2856417 | 2857695 | + |
| BGC_89            | tig00101499_arrow_pilon | tig00101499_arrow-g10479-AFLA_114820 | 2858237 | 2863583 | - |
| BGC_89            | tig00101499_arrow_pilon | tig00101499_arrow-g10480-AFLA_114810 | 2866013 | 2867475 | + |
| BGC_89            | tig00101499_arrow_pilon | tig00101499_arrow-g10481-AFLA_114790 | 2868124 | 2869182 | + |
| BGC_89            | tig00101499_arrow_pilon | tig00101499_arrow-g10482-AFLA_114780 | 2869981 | 2871081 | + |
| BGC_89            | tig00101499_arrow_pilon | tig00101499_arrow-g10483-AFLA_114760 | 2872213 | 2875890 | + |
| BGC_89            | tig00101499_arrow_pilon | tig00101499_arrow-g10484-AFLA_114750 | 2876129 | 2878163 | - |
| BGC_89            | tig00101499_arrow_pilon | tig00101499_arrow-g10485-AFLA_114740 | 2878581 | 2880468 | - |
| BGC_89            | tig00101499_arrow_pilon | tig00101499_arrow-g10486-AFLA_114720 | 2880957 | 2889442 | + |
| BGC_90            | tig00000001_arrow_pilon | tig00000001_arrow-g2427-AFLA_127970  | 1322232 | 1328729 | - |
| BGC_90            | tig00000001_arrow_pilon | tig00000001_arrow-g2428-AFLA_127980  | 1329571 | 1330063 | - |
| BGC_90            | tig00000001_arrow_pilon | tig00000001_arrow-g2429-AFLA_127990  | 1330138 | 1331109 | + |
| BGC_90            | tig00000001_arrow_pilon | tig00000001_arrow-g2430-AFLA_128000  | 1331681 | 1333612 | - |
| BGC_90            | tig00000001_arrow_pilon | tig00000001_arrow-g2431-AFLA_128010  | 1334068 | 1335625 | - |
| BGC_90            | tig00000001_arrow_pilon | tig00000001_arrow-g2432-AFLA_128020  | 1336641 | 1337390 | + |
| BGC_90            | tig00000001_arrow_pilon | tig00000001_arrow-g2433-AFLA_128040  | 1338068 | 1340030 | - |
| BGC_90            | tig00000001_arrow_pilon | tig00000001_arrow-g2434-AFLA_128050  | 1340345 | 1341251 | - |
| BGC_90            | tig00000001_arrow_pilon | tig00000001_arrow-g2435-AFLA_128060  | 1342275 | 1350857 | + |
| BGC_90            | tig00000001_arrow_pilon | tig00000001_arrow-g2436-AFLA_128070  | 1351969 | 1353318 | - |
| BGC_90            | tig00000001_arrow_pilon | tig00000001_arrow-g2437-AFLA_128080  | 1354108 | 1355557 | + |
| BGC_90            | tig00000001_arrow_pilon | tig00000001_arrow-g2438-AFLA_128090  | 1356175 | 1357920 | + |
| BGC_90            | tig00000001_arrow_pilon | tig00000001_arrow-g2439-AFLA_128100  | 1358198 | 1360213 | - |
| BGC_90            | tig00000001_arrow_pilon | tig00000001_arrow-g2440-AFLA_128110  | 1361982 | 1363116 | + |
| BGC_90            | tig00000001_arrow_pilon | tig00000001_arrow-g2441-AFLA_128120  | 1363952 | 1365668 | - |
| BGC_90            | tig00000001_arrow_pilon | tig00000001_arrow-g2442-AFLA_128130  | 1370417 | 1377408 | + |
| BGC_90            | tig00000001_arrow_pilon | tig00000001_arrow-g2443-AFLA_128140  | 1378370 | 1380662 | + |
| BGC_90            | tig00000001_arrow_pilon | tig00000001_arrow-g2444-AFLA_128150  | 1381901 | 1384092 | + |
| BGC_90            | tig00000001_arrow_pilon | tig00000001_arrow-g2445-AFLA_128160  | 1385924 | 1388410 | + |
| BGC_90            | tig00000001_arrow_pilon | tig00000001_arrow-g2446-AFLA_128170  | 1389454 | 1394898 | + |
| BGC_90            | tig00000001_arrow_pilon | tig00000001_arrow-g2447-AFLA_128190  | 1395998 | 1399502 | - |
| BGC_90            | tig00000001_arrow_pilon | tig00000001_arrow-g2448-AFLA_128200  | 1399968 | 1401564 | + |
| BGC_90            | tig00000001_arrow_pilon | tig00000001_arrow-g2449-AFLA_128210  | 1402271 | 1405215 | + |
| BGC_90            | tig00000001_arrow_pilon | tig00000001_arrow-g2450-AFLA_128220  | 1405597 | 1409329 | - |
| BGC_90            | tig00000001_arrow_pilon | tig00000001_arrow-g2451-AFLA_128230  | 1411238 | 1412139 | - |
| BGC_90            | tig00000001_arrow_pilon | tig00000001_arrow-g2452-AFLA_128240  | 1412417 | 1413600 | + |
| BGC_90            | tig00000001_arrow_pilon | tig00000001_arrow-g2453-AFLA_128250  | 1413953 | 1414838 | - |
| BGC_91            | tig00000050_arrow_pilon | tig00000050_arrow-g8624-AFLA_066950  | 756883  | 758954  | + |
| BGC_91            | tig00000050_arrow_pilon | tig00000050_arrow-g8625-AFLA_066970  | 759341  | 760372  | - |
| BGC_91            | tig00000050_arrow_pilon | tig00000050_arrow-g8626              | 760888  | 761707  | - |
| BGC_91            | tig00000050_arrow_pilon | tig00000050_arrow-g8627-AFLA_066980  | 762601  | 773128  | + |
| BGC_91            | tig00000050_arrow_pilon | tig00000050_arrow-g8628-AFLA_067000  | 777499  | 778552  | + |
| BGC_91            | tig00000050_arrow_pilon | tig00000050_arrow-g8629-AFLA_067010  | 780543  | 783135  | + |
| BGC_91            | tig00000050_arrow_pilon | tig00000050_arrow-g8630-AFLA_067020  | 786048  | 790527  | + |
| BGC_91            | tig00000050_arrow_pilon | tig00000050_arrow-g8631-AFLA_067040  | 792579  | 794281  | + |
| CPA               | tig00000023_arrow_pilon | tig00000023_arrow-g5504-AFLA_139470  | 5109935 | 5111302 | + |
| CPA               | tig00000023_arrow_pilon | tig00000023_arrow-g5505-AFLA_139480  | 5111801 | 5113170 | - |
| CPA               | tig00000023_arrow_pilon | tig00000023_arrow-g5506-AFLA_139490  | 5114149 | 5125869 | + |
| Ditryptophenaline | tig00000029_arrow_pilon | tig00000029_arrow-g6547-AFLA_005460  | 3332752 | 3334293 | + |
| Ditryptophenaline | tig00000029_arrow_pilon | tig00000029_arrow-g6548-AFLA_005440  | 3336086 | 3346421 | + |
| Imizoquin         | tig00000050_arrow_pilon | tig00000050_arrow-g8396-AFLA_064240  | 43861   | 54073   | - |
| Imizoquin         | tig00000050_arrow_pilon | tig00000050_arrow-g8397              | 54503   | 56771   | + |
| Imizoquin         | tig00000050_arrow_pilon | tig00000050_arrow-g8398-AFLA_064260  | 57264   | 59192   | - |
| Imizoquin         | tig00000050_arrow_pilon | tig00000050_arrow-g8399-AFLA_064270  | 59836   | 60996   | + |

|                 |                         |                                     |         |         |   |
|-----------------|-------------------------|-------------------------------------|---------|---------|---|
| Imizoquin       | tig00000050_arrow_pilon | tig00000050_arrow-g8400-AFLA_064280 | 61536   | 62754   | + |
| Imizoquin       | tig00000050_arrow_pilon | tig00000050_arrow-g8401-AFLA_064290 | 63125   | 63868   | - |
| Imizoquin       | tig00000050_arrow_pilon | tig00000050_arrow-g8402-AFLA_064300 | 64135   | 65505   | - |
| Imizoquin       | tig00000050_arrow_pilon | tig00000050_arrow-g8403             | 66090   | 69673   | + |
| Imizoquin       | tig00000050_arrow_pilon | tig00000050_arrow-g8404-AFLA_064330 | 70100   | 71518   | - |
| LeporinB        | tig00000050_arrow_pilon | tig00000050_arrow-g8614-AFLA_066840 | 724736  | 736576  | - |
| LeporinB        | tig00000050_arrow_pilon | tig00000050_arrow-g8615-AFLA_066850 | 736861  | 737235  | + |
| LeporinB        | tig00000050_arrow_pilon | tig00000050_arrow-g8616-AFLA_066860 | 737669  | 739944  | - |
| LeporinB        | tig00000050_arrow_pilon | tig00000050_arrow-g8617-AFLA_066880 | 740577  | 742087  | + |
| LeporinB        | tig00000050_arrow_pilon | tig00000050_arrow-g8618-AFLA_066890 | 742686  | 744597  | - |
| LeporinB        | tig00000050_arrow_pilon | tig00000050_arrow-g8619-AFLA_066900 | 746873  | 749409  | + |
| LeporinB        | tig00000050_arrow_pilon | tig00000050_arrow-g8620-AFLA_066910 | 750124  | 751264  | - |
| LeporinB        | tig00000050_arrow_pilon | tig00000050_arrow-g8621-AFLA_066920 | 751624  | 752765  | + |
| LeporinB        | tig00000050_arrow_pilon | tig00000050_arrow-g8622-AFLA_066930 | 752977  | 754828  | - |
| LeporinB        | tig00000050_arrow_pilon | tig00000050_arrow-g8623-AFLA_066940 | 754962  | 756355  | + |
| Lovastatin-like | tig00000037_arrow_pilon | tig00000037_arrow-g8373-AFLA_096580 | 4481241 | 4485628 | - |
| Lovastatin-like | tig00000037_arrow_pilon | tig00000037_arrow-g8374-AFLA_096610 | 4486177 | 4488901 | - |
| Lovastatin-like | tig00000037_arrow_pilon | tig00000037_arrow-g8375-AFLA_096620 | 4489707 | 4490858 | + |
| Lovastatin-like | tig00000037_arrow_pilon | tig00000037_arrow-g8376-AFLA_096630 | 4491470 | 4492816 | + |
| Lovastatin-like | tig00000037_arrow_pilon | tig00000037_arrow-g8377-AFLA_096640 | 4493224 | 4494711 | - |
| Lovastatin-like | tig00000037_arrow_pilon | tig00000037_arrow-g8378-AFLA_096650 | 4495118 | 4495598 | - |
| Lovastatin-like | tig00000037_arrow_pilon | tig00000037_arrow-g8379-AFLA_096660 | 4497021 | 4497393 | + |
| Lovastatin-like | tig00000037_arrow_pilon | tig00000037_arrow-g8380-AFLA_096670 | 4498250 | 4498948 | + |
| Lovastatin-like | tig00000037_arrow_pilon | tig00000037_arrow-g8381-AFLA_096680 | 4499915 | 4501570 | + |
| Lovastatin-like | tig00000037_arrow_pilon | tig00000037_arrow-g8382-AFLA_096690 | 4501843 | 4503198 | - |
| Lovastatin-like | tig00000037_arrow_pilon | tig00000037_arrow-g8383-AFLA_096710 | 4504708 | 4512112 | + |
| Lovastatin-like | tig00000037_arrow_pilon | tig00000037_arrow-g8384-AFLA_096730 | 4513606 | 4515618 | + |
| Lovastatin-like | tig00000037_arrow_pilon | tig00000037_arrow-g8385-AFLA_096740 | 4516009 | 4517524 | - |
| Lovastatin-like | tig00000037_arrow_pilon | tig00000037_arrow-g8386-AFLA_096750 | 4518467 | 4520023 | - |
| Lovastatin-like | tig00000037_arrow_pilon | tig00000037_arrow-g8387-AFLA_096770 | 4520579 | 4535297 | + |
| Lovastatin-like | tig00000037_arrow_pilon | tig00000037_arrow-g8388-AFLA_096780 | 4536140 | 4537587 | - |
| UstiloxinB      | tig00000037_arrow_pilon | tig00000037_arrow-g8238             | 4097546 | 4099357 | + |
| UstiloxinB      | tig00000037_arrow_pilon | tig00000037_arrow-g8239-AFLA_094960 | 4099564 | 4101392 | + |
| UstiloxinB      | tig00000037_arrow_pilon | tig00000037_arrow-g8240-AFLA_094980 | 4102135 | 4102904 | + |
| UstiloxinB      | tig00000037_arrow_pilon | tig00000037_arrow-g8241-AFLA_094990 | 4103349 | 4104258 | - |
| UstiloxinB      | tig00000037_arrow_pilon | tig00000037_arrow-g8242-AFLA_095010 | 4104782 | 4106912 | + |
| UstiloxinB      | tig00000037_arrow_pilon | tig00000037_arrow-g8243-AFLA_095020 | 4107013 | 4107986 | - |
| UstiloxinB      | tig00000037_arrow_pilon | tig00000037_arrow-g8244-AFLA_095030 | 4108429 | 4110493 | + |
| UstiloxinB      | tig00000037_arrow_pilon | tig00000037_arrow-g8245-AFLA_095040 | 4110601 | 4112053 | - |
| UstiloxinB      | tig00000037_arrow_pilon | tig00000037_arrow-g8246-AFLA_095050 | 4112318 | 4113967 | + |
| UstiloxinB      | tig00000037_arrow_pilon | tig00000037_arrow-g8247-AFLA_095060 | 4114182 | 4115531 | + |
| UstiloxinB      | tig00000037_arrow_pilon | tig00000037_arrow-g8248-AFLA_095070 | 4115655 | 4117445 | - |
| UstiloxinB      | tig00000037_arrow_pilon | tig00000037_arrow-g8249-AFLA_095090 | 4119637 | 4121463 | + |
| UstiloxinB      | tig00000037_arrow_pilon | tig00000037_arrow-g8250-AFLA_095100 | 4121770 | 4122660 | - |

<sup>1</sup> Contig and gene names refer to names used in in annotation files (see Drott et al. (21)). Contig names correspond to chromosome names indicated in Fig. S3. When genes were identified by reciprocal best-hit blast as being the same as existing genes named on NCBI, the NCBI gene name was appended to the end of the gene name (indicated as AFLA\_#####).

**Table S3.** Within-population estimates of dN/dS ratios ( $\omega$ ) from the backbone genes of 22 biosynthetic gene clusters (BGCs) where population-specific patterns were identified. Note that dN/dS estimates generated within population must be interpreted cautiously as they may not follow patterns that are often interpreted between species (reviewed by (6)).

| Cluster name                     | Population A         |        |        |        |      | Population B         |        |        |        |      | Population C         |        |        |        |      |
|----------------------------------|----------------------|--------|--------|--------|------|----------------------|--------|--------|--------|------|----------------------|--------|--------|--------|------|
|                                  | $\omega$             | dN     | dS     | Sample | SNPs | $\omega$             | dN     | dS     | Sample | SNPs | $\omega$             | dN     | dS     | Sample | SNPs |
| BGC_2                            |                      |        |        | 0      | 0    |                      |        |        | 0      | 0    |                      |        |        | 6      | 0    |
| BGC_4                            | 0.48209              | 0.0085 | 0.0175 | 6      | 23   |                      |        |        | 0      | 0    |                      |        |        | 6      | 0    |
| BGC_5                            | 0 <sup>1</sup>       | 0      | 0      | 0      | 2    |                      |        |        | 0      | 0    |                      |        |        | 6      | 0    |
| BGC_6                            | 0.41948              | 0.0255 | 0.0607 | 25     | 243  | 0 <sup>1</sup>       | 0      | 0      | 47     | 4    |                      |        |        | 7      | 0    |
| BGC_7                            | 0.57366              | 0.0461 | 0.0803 | 27     | 177  |                      |        |        | 0      | 0    |                      |        |        | 0      | 0    |
| BGC_8                            | 0.75067              | 0.09   | 0.1199 | 32     | 47   | 0 <sup>1</sup>       | 0      | 0      | 48     | 3    | 0 <sup>1</sup>       | 0      | 0      | 11     | 2    |
| Piperazine (InB)                 | 0.26354 <sup>2</sup> | 0.0019 | 0.0074 | 17     | 10   |                      |        |        | 0      | 0    |                      |        |        | 0      | 0    |
| BGC_10                           | 0.52364              | 0.0089 | 0.017  | 6      | 85   |                      |        |        | 0      | 0    |                      |        |        | 0      | 0    |
| BGC_11                           |                      |        |        | 0      | 0    | 2.30471 <sup>2</sup> | 0.0085 | 0.0037 | 48     | 38   |                      |        |        | 0      | 0    |
| Astellolide                      |                      |        |        | 0      | 0    | 0 <sup>1</sup>       | 0      | 0      | 48     | 2    |                      |        |        | 11     | 0    |
| BGC_13                           | 0 <sup>1</sup>       | 0      | 0      | 0      | 2    |                      |        |        | 0      | 0    |                      |        |        | 0      | 0    |
| BGC_14 (AFLA_042400)             | 0.97319              | 0.0451 | 0.0463 | 25     | 61   | 0.29266 <sup>2</sup> | 0.0029 | 0.0098 | 48     | 16   |                      |        |        | 11     | 0    |
| BGC_14 (AFLA_042380)             | 0.34882              | 0.6301 | 1.8065 | 33     | 163  | 0.43781              | 0.0209 | 0.0478 | 48     | 41   |                      |        |        | 11     | 0    |
| BGC_15                           | 0.35482              | 0.0151 | 0.0425 | 33     | 156  | 0.28905              | 0.0076 | 0.0264 | 48     | 90   |                      |        |        | 0      | 0    |
| Lovastatin-like (AFLA_096710)    | 0.67736              | 0.1268 | 0.1872 | 33     | 267  | 0.77471              | 0.1663 | 0.2147 | 48     | 288  | 0.41037              | 0.0114 | 0.0279 | 11     | 56   |
| Lovastatin-like (AFLA_096770)    | 0.19164              | 0.0157 | 0.082  | 33     | 397  | 1.1805 <sup>2</sup>  | 0.0017 | 0.0015 | 40     | 19   | 0.23328              | 0.0037 | 0.0159 | 11     | 93   |
| Aflatoxin                        | 0.55728              | 0.0106 | 0.019  | 33     | 79   | 0 <sup>1</sup>       | 0      | 0      | 21     | 2    | 0.76605 <sup>2</sup> | 0.0027 | 0.0035 | 11     | 18   |
| Cyclopiazonic acid (AFLA_139480) | 0.16904              | 0.0407 | 0.2406 | 33     | 108  | 0.61345              | 0.0046 | 0.0075 | 27     | 7    | 0 <sup>1</sup>       | 0      | 0      | 11     | 1    |
| Cyclopiazonic acid (AFLA_139490) | 0.24031              | 0.0391 | 0.1627 | 33     | 792  | 0.99971 <sup>2</sup> | 0.0044 | 0.0044 | 27     | 42   | 0.43445              | 0.0047 | 0.0108 | 11     | 73   |
| Ustiloxin B                      | 0.03446              | 0.0253 | 0.7334 | 33     | 76   | 0.01187              | 0.0026 | 0.2194 | 43     | 18   | 0.0001               | 0      | 0.2064 | 11     | 32   |
| BGC_20                           | 0.60561              | 0.0309 | 0.0511 | 33     | 107  | 0 <sup>1</sup>       | 0      | 0      | 48     | 5    | 0.43705              | 0.006  | 0.0137 | 11     | 25   |
| BGC_21                           | 0.61364              | 0.0151 | 0.0246 | 33     | 29   | 0.61663              | 0.0185 | 0.03   | 48     | 39   | 0 <sup>1</sup>       | 0      | 0      | 11     | 3    |
| Aflatrem (ATM1)                  | 0.21236              | 0.0173 | 0.0815 | 33     | 55   | 0.80365              | 0.0529 | 0.0659 | 48     | 62   |                      |        |        | 11     | 0    |
| BGC_23 (AFLA_064560)             | 0.27527              | 0.0116 | 0.042  | 33     | 67   | 0.61155 <sup>2</sup> | 0.0028 | 0.0046 | 48     | 15   | 0.31679              | 0.0053 | 0.0166 | 11     | 38   |
| BGC_23 (not in ref)              | 0.17239              | 0.0062 | 0.0357 | 8      | 45   | 0 <sup>1</sup>       | 0      | 0      | 48     | 4    | 0.10254              | 0.0027 | 0.0259 | 3      | 32   |
| BGC_24 (AFLA_066720)             | 0.37579              | 0.0126 | 0.0335 | 33     | 248  | 0.4999               | 0.0035 | 0.0069 | 48     | 81   | 0.39837              | 0.0049 | 0.0122 | 11     | 112  |
| BGC_24 (not in ref)              | 0.76484              | 0.0436 | 0.0571 | 13     | 20   |                      |        |        | 0      | 0    |                      |        |        | 0      | 0    |

<sup>1</sup> Estimates of omega (dN/dS) that arose from five or fewer SNPs have been set to zero

<sup>2</sup> When dS < 0.01 we suggest that there may be insufficient data to support estimates of omega



**Table S4.** High resolution mass data for secondary metabolites

| Metabolite                | Chemical formula                                               | Retention time (min) | ES <sup>+</sup>       |                     | PubChem database <sup>1</sup> | MoNA database | MASST database |
|---------------------------|----------------------------------------------------------------|----------------------|-----------------------|---------------------|-------------------------------|---------------|----------------|
|                           |                                                                |                      | Calculated <i>m/z</i> | Measured <i>m/z</i> |                               |               |                |
| Aflatoxin B1              | C <sub>17</sub> H <sub>12</sub> O <sub>6</sub>                 | 11.6                 | 313.0707              | 313.0702            | -                             | Matched       | -              |
| Cyclopiazonic acid        | C <sub>20</sub> H <sub>20</sub> N <sub>2</sub> O <sub>3</sub>  | 19.9                 | 337.1546              | 337.1547            | -                             | Matched       | -              |
| Leporin B                 | C <sub>22</sub> H <sub>25</sub> NO <sub>3</sub>                | 28.7                 | 352.1907              | 352.1907            | Matched                       | -             | -              |
| Ditryptophenaline         | C <sub>42</sub> H <sub>40</sub> N <sub>6</sub> O <sub>4</sub>  | 17.7                 | 693.3184              | 693.3177            | -                             | -             | Matched        |
| Aflavarin                 | C <sub>24</sub> H <sub>23</sub> O <sub>9</sub>                 | 14.0                 | 455.1337              | 455.1329            | Matched                       | -             | -              |
| Aflatrem                  | C <sub>32</sub> H <sub>39</sub> NO <sub>4</sub>                | 26.9                 | 502.2930              | 502.2917            | -                             | -             | Matched        |
| 14-Deacetyl astellolide A | C <sub>24</sub> H <sub>28</sub> O <sub>7</sub>                 | 16.9                 | 429.1908              | 429.1913            | Matched                       | -             | -              |
| 14-Deacetyl astellolide B | C <sub>24</sub> H <sub>28</sub> O <sub>8</sub>                 | 14.5                 | 445.1857              | 445.1862            | Matched                       | -             | -              |
| Astellolide A             | C <sub>26</sub> H <sub>30</sub> O <sub>8</sub>                 | 20.0                 | 471.3013              | 471.2018            | Matched                       | -             | -              |
| Astellolide B             | C <sub>26</sub> H <sub>30</sub> O <sub>9</sub>                 | 16.8                 | 487.1963              | 487.1968            | Matched                       | -             | -              |
| Asparasone A              | C <sub>18</sub> H <sub>14</sub> O <sub>8</sub>                 | 14.65                | 359.0761              | 359.0767            | Matched                       | -             | -              |
| Piperizine <sup>2</sup>   | C <sub>18</sub> H <sub>21</sub> NO <sub>4</sub>                | 16.2                 | 316.1543              | 316.1549            | -                             | -             | -              |
| Ustiloxin B               | C <sub>26</sub> H <sub>39</sub> N <sub>5</sub> O <sub>12</sub> | 6.65                 | 646.2389              | 646.2394            | Matched                       | -             | -              |

<sup>1</sup>Compounds were confirmed relative to PubChem based on monoisotopic masses/chemical formulas matches. However, these identifications could not be confirmed via fragmentation analysis as chemical standards were not available at this time; therefore these are considered putative identifications

<sup>2</sup>Matching of chemical formula was determined relative to piperazine compound 7 identified by Forseth et al. (26)

## SI References

1. P. Rice, I. Longden, A. Bleasby, EMBOSS: the European molecular biology open software suite. *Trends in Genetics* **16**, 276-277 (2000).
2. H. Wickham, ggplot2: elegant graphics for data analysis. (2016).
3. S. F. Altschul, W. Gish, W. Miller, E. W. Myers, D. J. Lipman, Basic local alignment search tool. *Journal of Molecular Biology* **215**, 403-410 (1990).
4. S. Lu *et al.*, CDD/SPARCLE: the conserved domain database in 2020. *Nucleic Acids Research* **48**, D265-D268 (2020).
5. H. Li, Aligning sequence reads, clone sequences and assembly contigs with BWA-MEM. *arXiv preprint arXiv:1303.3997* (2013).
6. S. Kryazhimskiy, J. B. Plotkin, The population genetics of dN/dS. *PLoS Genet* **4**, e1000304 (2008).
7. K. Katoh, K.-i. Kuma, H. Toh, T. Miyata, MAFFT version 5: improvement in accuracy of multiple sequence alignment. *Nucleic acids research* **33**, 511-518 (2005).
8. L.-T. Nguyen, H. A. Schmidt, A. Von Haeseler, B. Q. Minh, IQ-TREE: a fast and effective stochastic algorithm for estimating maximum-likelihood phylogenies. *Molecular biology and evolution* **32**, 268-274 (2015).
9. M. Suyama, D. Torrents, P. Bork, PAL2NAL: robust conversion of protein sequence alignments into the corresponding codon alignments. *Nucleic acids research* **34**, W609-W612 (2006).
10. Z. Yang, PAML 4: phylogenetic analysis by maximum likelihood. *Molecular biology and evolution* **24**, 1586-1591 (2007).
11. R. Tautenhahn, G. J. Patti, D. Rinehart, G. Siuzdak, XCMS Online: a web-based platform to process untargeted metabolomic data. *Analytical Chemistry* **84**, 5035-5039 (2012).
12. H. Gowda *et al.*, Interactive XCMS Online: simplifying advanced metabolomic data processing and subsequent statistical analyses. *Analytical Chemistry* **86**, 6931-6939 (2014).
13. B. T. Pfannenstiel, C. Greco, A. T. Sukowaty, N. P. Keller, The epigenetic reader SntB regulates secondary metabolism, development and global histone modifications in *Aspergillus flavus*. *Fungal Genetics and Biology* **120**, 9-18 (2018).
14. J. Tannous *et al.*, Fungal attack and host defence pathways unveiled in near-avirulent interactions of *Penicillium expansum* creA mutants on apples. *Molecular Plant Pathology* **19**, 2635-2650 (2018).
15. M. F. Clasquin, E. Melamud, J. D. Rabinowitz, LC-MS data processing with MAVEN: a metabolomic analysis and visualization engine. *Current Protocols in Bioinformatics* **37**, 14.11. 11-14.11. 23 (2012).
16. R. A. Zubarev, P. Håkansson, B. Sundqvist, Accuracy requirements for peptide characterization by monoisotopic molecular mass measurements. *Analytical Chemistry* **68**, 4060-4063 (1996).
17. T. Kind, O. Fiehn, Metabolomic database annotations via query of elemental compositions: mass accuracy is insufficient even at less than 1 ppm. *BMC Bioinformatics* **7**, 234 (2006).

18. X. Domingo-Almenara *et al.*, XCMS-MRM and METLIN-MRM: a cloud library and public resource for targeted analysis of small molecules. *Nature Methods* **15**, 681-684 (2018).
19. S. Lê, J. Josse, F. Husson, FactoMineR: an R package for multivariate analysis. *Journal of Statistical Software* **25**, 1-18 (2008).
20. H. Wickham, Tidyverse: Easily install and load 'Tidyverse' packages. R package version 1.1.1. (2017).
21. M. T. Drott *et al.*, The frequency of sex: population genomics reveals differences in recombination and population structure of the aflatoxin-producing fungus *Aspergillus flavus*. *mBio* **11** (2020).
22. M. T. Drott, L. M. Fessler, M. G. Milgroom, Population subdivision and the frequency of aflatoxigenic isolates in *Aspergillus flavus* in the United States. *Phytopathology* **109**, 878-886 (2019).
23. J. C. Frisvad *et al.*, Taxonomy of *Aspergillus* section *Flavi* and their production of aflatoxins, ochratoxins and other mycotoxins. *Studies in Mycology* **93**, 1-63 (2019).
24. P. Singh, M. J. Orbach, P. J. Cotty, *Aspergillus texensis*: a novel aflatoxin producer with S morphology from the United States. *Toxins* **10**, 513 (2018).
25. J. Houbraken *et al.*, Classification of *Aspergillus*, *Penicillium*, *Talaromyces* and related genera (*Eurotiales*): An overview of families, genera, subgenera, sections, series and species. *Studies in Mycology* **95**, 5-169 (2020).
26. R. R. Forseth *et al.*, Homologous NRPS-like gene clusters mediate redundant small-molecule biosynthesis in *Aspergillus flavus*. *Angewandte Chemie International Edition* **52**, 1590-1594 (2013).
